# Supplementary material for: An antimicrobial peptide-resistant minor subpopulation of Photorhabdus luminescens is responsible for virulence
Source: PubMed Central journal article supplement (PMC5333078; doi:10.1038/srep43670), 2017-03-02
Supplement: srep43670-s1.pdf [file srep43670-s1.pdf]

## Supplementary Information:

### **An antimicrobial peptide-resistant minor subpopulation of *Photorhabdus luminescens* is responsible for virulence**

Annabelle Mouammine<sup>1\*</sup>, Sylvie Pages<sup>1</sup>, Anne Lanois<sup>1</sup>, Sophie Gaudriault<sup>1</sup>, Gregory Jubelin<sup>2</sup>,  
Maurine Bonabaud<sup>3</sup>, Stéphane Cruveiller<sup>4</sup>, Emeric Dubois<sup>3</sup>, David Roche<sup>4</sup>, Ludovic Legrand<sup>5</sup>,  
Julien Brillard<sup>1</sup> and Alain Givaudan<sup>1#</sup>

<sup>1</sup> DGIMI, INRA, Univ. Montpellier, Montpellier, France

<sup>2</sup> INRA, UR454 Microbiologie, Saint-Genès-Champanelle, France

<sup>3</sup> MGX-Montpellier GenomiX, c/o IGF, Montpellier, France

<sup>4</sup> Laboratoire d'Analyse Bioinformatique en Génomique et Métabolisme, CEA, Genoscope & CNRS, Evry, France

<sup>6</sup> LIPM, INRA, CNRS, Castanet-Tolosan, France

#### **Supplementary Legends:**

**Supplementary Figure 1: Only 0.5% of TT01 bacteria are resistant to polymyxin B.** The proportion of resistant TT01 bacteria was assessed by counting CFUs on nutrient agar plates in the presence (100 µg/mL) and absence of polymyxin B. The proportion of resistant bacteria for each OD<sub>540</sub> tested is shown in the boxes. The black line is a representative curve of the growth of the TT01 strain over time. Experiments were performed at least three times.

**Supplementary Figure 2: No insect death and septicemia observed after the injection of the *phoP* or *pbgE* mutants.** Bacterial growth and insect larval mortality following the injection of the *phoP* or *pbgE* mutant strains into *Spodoptera littoralis*. We injected about 10<sup>4</sup>

bacteria into each larva at time zero. The histogram shows the mean numbers of CFU of *phoP* (in green) or *pbgE* (in blue) recovered from four larvae per time point, after plating on nutrient agar. The error bars indicate the standard error of the mean. The lines indicate larval mortality rates (for 20 larvae per treatment). One representative experiment from more than three independent experiments carried out is shown.

**Supplementary Figure 3: The resistant subpopulation kills insects more rapidly than the wild-type strain.** Survival curves over time are shown for TT01 (blue) and the resistant subpopulation preselected with polymyxin B (green). For each set of conditions, we injected  $10^3$  bacteria in a volume of 20  $\mu$ l into each of 20 *Spodoptera littoralis* larvae. More than seven independent experiments were analyzed with R software. Statistically significant differences were detected ( $p < 0.005$ ; Wilcoxon test).

**Supplementary Table 1:** Mutations identified in the polymyxin B-resistant population

**Supplementary Table 2A:** List of 55 genes differentially expressed between *P. luminescens* TT01 wild-type strain and its isogenic *phoP* mutant in LB culture.

**Supplementary Table 2B:** List of 64 genes differentially expressed between *P. luminescens* TT01 wild-type strain and its isogenic *phoP* mutant in low  $Mg^{2+}$  culture.

**Supplementary Table 2C:** List of the 21 genes belonging to the core PhoP regulon of *P. luminescens* TT01.

**Supplementary Table 3A:** List of 445 genes differentially expressed in *P. luminescens* TT01 between LB culture and LB+polymyxin B culture.

**Supplementary Table 3B:** List of 208 genes underexpressed in *P. luminescens* TT01 between LB culture and LB+polymyxin B culture.

**Supplementary Table 3C:** List of 237 genes overexpressed in *P. luminescens* TT01 between LB culture and LB+polymyxin B culture.

**Supplementary Table 3D:** RT-qPCR comparative analysis of 20 differentially expressed marker genes in polyB resistant clones (PolyR) cultivated in LB+polyB or in LB cultures.

**Supplementary Table 4:** Bacterial strains and plasmids used in this study.

**Supplementary Table 5:** Oligonucleotides used in this study.

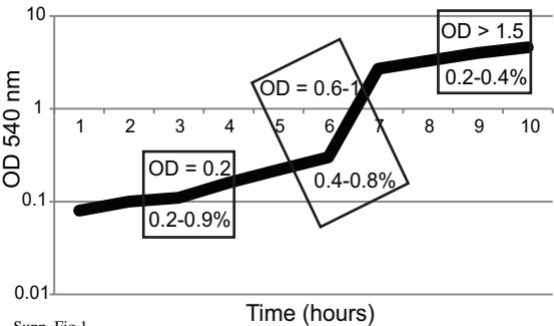

Supp. Fig.1

mean no. CFU/insects larvae (n=4)

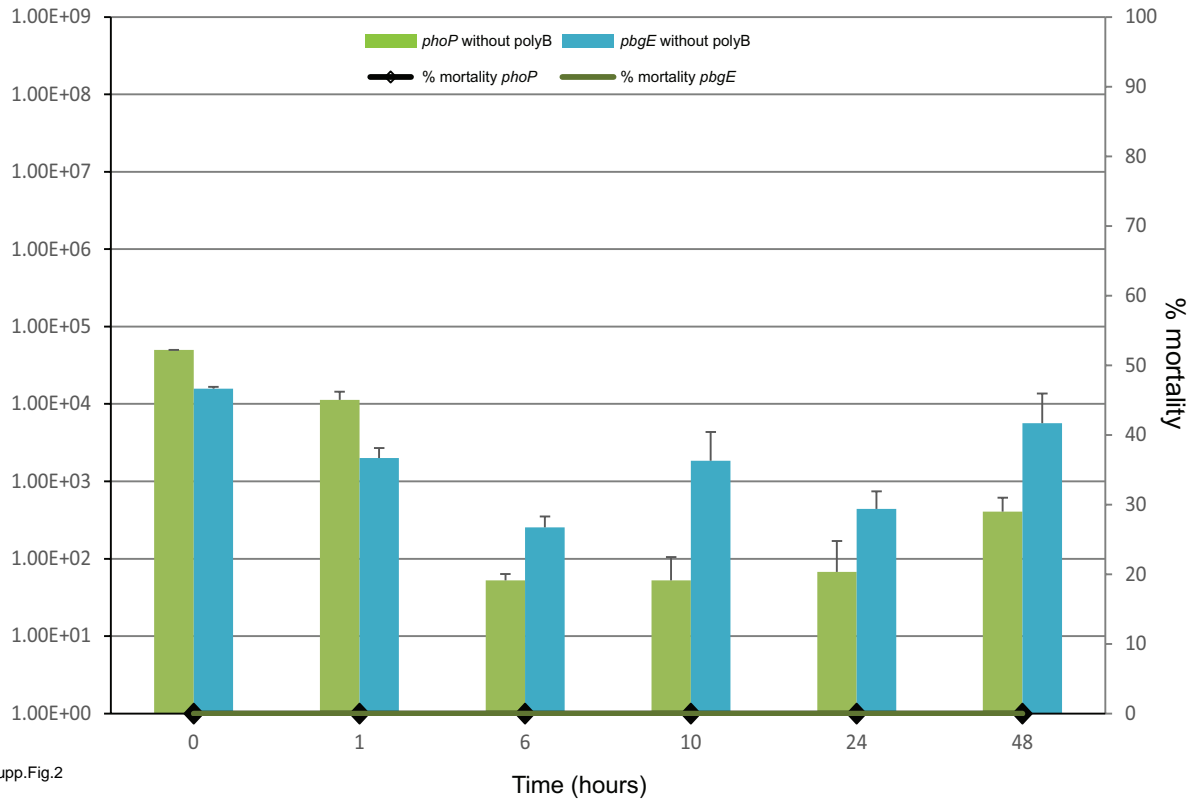

Supp. Figure 3

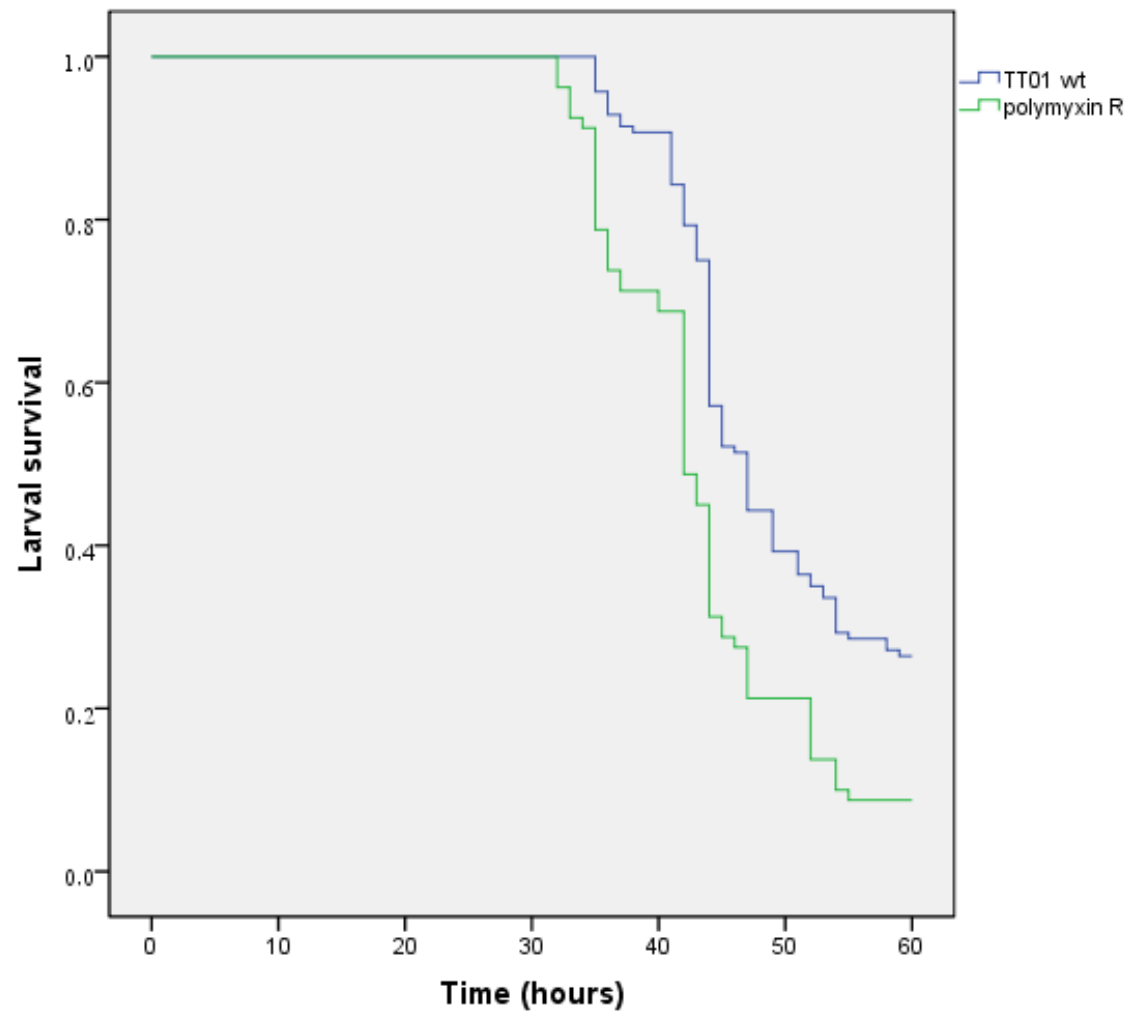

Supplementary Table 1 : Putative mutations identified in the polymyxin B-resistant population <sup>1</sup>

| Proposed mutation | Position in reference | Sequence in reference | Alternative sequence | Repeated region (defined by MaGe) |              | BlastN region analysis                                                                |
|-------------------|-----------------------|-----------------------|----------------------|-----------------------------------|--------------|---------------------------------------------------------------------------------------|
|                   |                       |                       |                      | Inside gene                       | Other repeat |                                                                                       |
| Deletion          | 22 403                | GG                    | G                    | plu0024 (pts11)                   |              | mutation not confirmed                                                                |
| Deletion          | 23 470                | GT                    | G                    |                                   |              | mutation not confirmed                                                                |
| Deletion          | 23 777                | CT                    | C                    |                                   | yes          | mutation not confirmed                                                                |
| Deletion          | 24 262                | GC                    | G                    |                                   |              | mutation not confirmed                                                                |
| Deletion          | 24 448                | TA                    | T                    | plu0027 (pts8)                    |              | mutation not confirmed                                                                |
| Deletion          | 24 489                | CA                    | C                    | plu0027 (pts8)                    |              | mutation not confirmed                                                                |
| Deletion          | 24 589                | GA                    | G                    | plu0027 (pts8)                    |              | mutation not confirmed                                                                |
| Deletion          | 24 602                | CA                    | C                    | plu0027 (pts8)                    |              | mutation not confirmed                                                                |
| SNP               | 26 515                | T                     | C                    | plu0030 (pts5)                    | yes          | mutation not confirmed                                                                |
| Deletion          | 28 253                | TC                    | T                    |                                   |              | mutation not confirmed                                                                |
| Deletion          | 994 863               | TTAAT                 | T                    |                                   |              | mutation not confirmed                                                                |
| Deletion          | 1 065 824             | ACTGTaaaactgtaaaa     | A                    |                                   | yes          | mutation not confirmed                                                                |
| Insertion         | 1 324 642             | A                     | AA                   | plu1145                           | yes          | mutation not confirmed                                                                |
| Insertion         | 1 714 443             | T                     | TT                   |                                   |              | mutation not confirmed                                                                |
| Deletion          | 3 525 319             | CA                    | C                    | plu3025                           |              | mutation not confirmed                                                                |
| SNP               | 4 207 440             | AA                    | TT                   |                                   | yes          | mutation not confirmed                                                                |
| Deletion          | 4 207 442             | AACT                  | A                    |                                   | yes          | mutation not confirmed                                                                |
| SNP               | 4 207 446             | ATC                   | CAG                  |                                   | yes          | mutation not confirmed                                                                |
| Deletion          | 4 779 633             | Tgaagtaaatagtatt      | T                    |                                   | yes          | mutation not confirmed                                                                |
| <b>Insertion</b>  | <b>5 531 259</b>      | <b>C</b>              | <b>Caaataagt</b>     |                                   | yes          | not confirmed but a 12Nt deletion is observed in the polymyxin B resistant population |

<sup>1</sup> The 20 mutations were identified in the polymyxin B-resistant population compared to the control population following the procedure described in Methods section. Their position refers to that in the reference *P. luminescens* TT01 NC\_005126 genome. The majority (n=17) of these 20 mutations was found in duplicated regions or in regions with a high number of repeats. We performed a BlastN comparison of the 0.4-1Kb regions surrounding each of these 20 putative mutations identified in the polymyxin B-resistant population against the control population. It revealed 100% identity for 19 of them between the two populations. Therefore, only one mutation at position 5 531 259 (indicated in bold) was identified: a 12-nucleotide deletion in RPT23004543, a 516-bp repeated sequence, itself located in RPTR964997, a broad region with a large number of repeats (n=435). It therefore remains unclear whether this deletion is a true mutation in the polymyxin B-resistant population or whether it is an artifact due to an incorrect interpretation of the sequence. However, given its location in an intergenic region 395 bp downstream from the stop codon of plu4751 (a transposase-encoding gene) and 617 bp upstream from the start codon of plu4750 (encoding a putative T3SS effector), this hypothetical mutation presumably has no function related to the polymyxin-B resistance of *P. luminescens* TT01.

**Supplementary Table 2A** : List of 55 genes differentially expressed between *P. luminescens* TT01 wild-type strain and its isogenic *phoP* mutant in LB culture (logarithmic phase, FDRs0.005, abs(log2FC)≥1)

# # indicates the genes belonging to the core PhoP regulon.

\* ratio *phoP*/WT

| Label            | Type       | Name         | Product                                                                                                                                              | Begin          | End            | Length      | Frame     | normalized average read count | log2 fold change* | adjusted p-value (FDR) |
|------------------|------------|--------------|------------------------------------------------------------------------------------------------------------------------------------------------------|----------------|----------------|-------------|-----------|-------------------------------|-------------------|------------------------|
| plu0104          | CDS        | -            | Conserved hypothetical secreted protein                                                                                                              | 101566         | 102060         | 495         | 1         | 241                           | -1.93             | 1.08e-6                |
| plu0480          | CDS        | -            | Conserved hypothetical protein with Galactose-binding like domain (IPR008979 domain)                                                                 | 520584         | 521060         | 477         | -2        | 2824                          | -1.30             | 1.70e-6                |
| <b>plu0691##</b> | <b>CDS</b> | <b>cutF</b>  | <b>Copper homeostasis protein CutF precursor</b>                                                                                                     | <b>794390</b>  | <b>795061</b>  | <b>672</b>  | <b>2</b>  | <b>1335</b>                   | <b>-1.98</b>      | <b>4.34e-17</b>        |
| plu0769          | CDS        | mrfA         | Major fimbrial subunit polypeptide, MrfA                                                                                                             | 888552         | 889091         | 540         | 3         | 1488                          | 2.28              | 6.92e-23               |
| plu0770          | CDS        | mrfB         | Fimbrial pilin protein precursor, MrfB                                                                                                               | 889175         | 889723         | 549         | 2         | 55                            | 2.22              | 3.92e-5                |
| plu0771          | CDS        | mrfC         | Outer membrane usher protein MrfC                                                                                                                    | 889743         | 892298         | 2556        | 3         | 257                           | 2.02              | 3.30e-8                |
| plu0858          | CDS        | -            | Conserved hypothetical protein; putative transmembrane protein                                                                                       | 987602         | 988066         | 465         | -3        | 29                            | -3.28             | 8.64e-6                |
| plu1334          | CDS        | -            | Similar to unknown protein VC1449 of <i>Vibrio cholerae</i>                                                                                          | 1552827        | 1553192        | 366         | 3         | 132                           | 1.79              | 2.40e-4                |
| plu1335          | CDS        | rtxC         | Cytolysin-activating lysine-acyltransferase RtxC                                                                                                     | 1553214        | 1553675        | 462         | 3         | 377                           | 1.62              | 9.96e-6                |
| plu1575          | CDS        | -            | Similar to crystalline inclusion protein type II (CipA-like protein)                                                                                 | 1882485        | 1882823        | 339         | -2        | 4463                          | -1.10             | 2.31e-5                |
| <b>plu1579##</b> | <b>CDS</b> | <b>-</b>     | <b>putative bactracin transport permease YbjG of <i>Escherichia coli</i></b>                                                                         | <b>1888106</b> | <b>1888714</b> | <b>609</b>  | <b>-3</b> | <b>234</b>                    | <b>-2.07</b>      | <b>1.61e-9</b>         |
| plu1889          | CDS        | -            | conserved hypothetical protein                                                                                                                       | 2252258        | 2252443        | 186         | -3        | 422                           | -1.22             | 2.52e-3                |
| plu1954          | CDS        | flhC         | Flagellin                                                                                                                                            | 2319961        | 2321028        | 1068        | 1         | 597                           | 1.61              | 3.46e-7                |
| plu2143          | CDS        | -            | hypothetical protein                                                                                                                                 | 2525733        | 2526353        | 621         | -2        | 1933                          | -1.04             | 1.02e-3                |
| <b>plu2480##</b> | <b>CDS</b> | <b>ail1</b>  | <b>Ail protein precursor of <i>Yersinia</i></b>                                                                                                      | <b>2920701</b> | <b>2921228</b> | <b>528</b>  | <b>-2</b> | <b>924</b>                    | <b>-2.37</b>      | <b>2.62e-21</b>        |
| plu2507          | CDS        | ygjB         | Highly similar to hypothetical oxidoreductase Ygjb of <i>Escherichia coli</i>                                                                        | 2951054        | 2951959        | 906         | 2         | 639                           | 1.13              | 2.61e-3                |
| pluCDS3053012R   | CDS        | -            | hypothetical protein                                                                                                                                 | 3053012        | 3053125        | 114         | -3        | 145                           | -1.49             | 2.07e-3                |
| plu2655          | CDS        | pbgE2        | 4-amino-4-deoxy-L-arabinose-phosphoundecaprenol flippase, PbgE2                                                                                      | 3108050        | 3108391        | 342         | -3        | 79                            | -1.56             | 4.45e-3                |
| plu2656          | CDS        | pbgE1        | 4-amino-4-deoxy-L-arabinose transferase, PbgE1 protein                                                                                               | 3108388        | 3110049        | 1662        | -1        | 384                           | -1.50             | 2.23e-6                |
| <b>plu2657##</b> | <b>CDS</b> | <b>pbgP4</b> | <b>Conserved hypothetical protein PbgP4</b>                                                                                                          | <b>3110057</b> | <b>3110950</b> | <b>894</b>  | <b>-3</b> | <b>568</b>                    | <b>-1.88</b>      | <b>2.07e-11</b>        |
| <b>plu2658##</b> | <b>CDS</b> | <b>pbgP3</b> | <b>UDP-L-Ara4N formyltransferase ; UDP-GlcA C-4'-decarboxylase PbgP3</b>                                                                             | <b>3110950</b> | <b>3112932</b> | <b>1983</b> | <b>-1</b> | <b>1364</b>                   | <b>-2.20</b>      | <b>8.52e-21</b>        |
| <b>plu2659##</b> | <b>CDS</b> | <b>pbgP2</b> | <b>undecaprenyl phosphate-L-Ara4FN transferase PbgP2</b>                                                                                             | <b>3112933</b> | <b>3113910</b> | <b>978</b>  | <b>-1</b> | <b>339</b>                    | <b>-2.36</b>      | <b>8.77e-14</b>        |
| <b>plu2660##</b> | <b>CDS</b> | <b>pbgP1</b> | <b>UDP-4-amino-4-deoxy-L-arabinose-oxoglutarate aminotransferase PbgP1</b>                                                                           | <b>3113911</b> | <b>3115056</b> | <b>1146</b> | <b>-1</b> | <b>435</b>                    | <b>-2.70</b>      | <b>4.89e-20</b>        |
| plu2784          | CDS        | pagP         | LipidA acyltransferase PagP                                                                                                                          | 3305063        | 3305686        | 624         | 2         | 54                            | -5.04             | 1.21e-18               |
| plu2807          | CDS        | phoP         | Two-component response regulator PhoP                                                                                                                | 3332475        | 3333143        | 669         | 3         | 122                           | -1.60             | 2.92e-4                |
| plu2959          | CDS        | -            | Some similarities with bacteriophage protein                                                                                                         | 3462838        | 3463425        | 588         | -1        | 642                           | -1.17             | 3.25e-3                |
| plu2962          | CDS        | -            | putative bacteriophage tail fiber protein                                                                                                            | 3466665        | 3468149        | 1485        | -2        | 290                           | -1.55             | 2.36e-4                |
| plu3259          | CDS        | -            | Truncated gene. Some similarities with unknown protein                                                                                               | 3860162        | 3860554        | 393         | -3        | 20                            | -2.66             | 5.13e-5                |
| plu3260          | CDS        | -            | putative Type VI secretion protein, VC_A0114 (IPR010263)                                                                                             | 3860551        | 3861900        | 1350        | -1        | 114                           | -2.32             | 8.44e-9                |
| plu3261          | CDS        | -            | putative type VI secretion protein, EvpB/VC_A0108, tail sheath (domain IPR010269)                                                                    | 3861916        | 3863442        | 1527        | -1        | 162                           | -2.36             | 5.75e-10               |
| plu3262          | CDS        | -            | putative Type VI secretion system, VipA, VC_A0107 or Hcp2 (domain IPR008312)                                                                         | 3863474        | 3863971        | 498         | -3        | 196                           | -2.31             | 1.50e-10               |
|                  |            |              | PTS system, trehalose-specific IIBC component (EIIBC-TRE) (trehalose-permease IIBC component) (phosphotransferase enzyme II, BC component) (EII-TRE) |                |                |             |           |                               |                   |                        |
| plu3288          | CDS        | treB         |                                                                                                                                                      | 3903006        | 3904427        | 1422        | -2        | 436                           | 1.20              | 1.98e-3                |
| <b>plu3736##</b> | <b>CDS</b> | <b>mgfE</b>  | <b>Magnesium transport protein MgfE</b>                                                                                                              | <b>4405167</b> | <b>4406237</b> | <b>1071</b> | <b>-2</b> | <b>1418</b>                   | <b>-3.98</b>      | <b>1.13e-56</b>        |
| plu3749          | CDS        | -            | putative phage lysis protein S (holin)                                                                                                               | 4421407        | 4421733        | 327         | -1        | 500                           | -1.20             | 2.07e-3                |
| <b>plu3988##</b> | <b>CDS</b> | <b>-</b>     | <b>conserved hypothetical protein</b>                                                                                                                | <b>4674261</b> | <b>4675196</b> | <b>936</b>  | <b>3</b>  | <b>542</b>                    | <b>-6.57</b>      | <b>2.64e-72</b>        |
| <b>plu4210##</b> | <b>CDS</b> | <b>-</b>     | <b>Conserved hypothetical protein with SANT/Myb DNA-binding domain (IPR001005)</b>                                                                   | <b>4923248</b> | <b>4925854</b> | <b>2607</b> | <b>-3</b> | <b>216</b>                    | <b>-1.94</b>      | <b>9.93e-8</b>         |
| <b>plu4211##</b> | <b>CDS</b> | <b>-</b>     | <b>Putative Type VI secretion system effector, Hcp (IPR008514)</b>                                                                                   | <b>4925955</b> | <b>4926446</b> | <b>492</b>  | <b>-2</b> | <b>351</b>                    | <b>-3.05</b>      | <b>1.89e-22</b>        |
| <b>plu4212##</b> | <b>CDS</b> | <b>-</b>     | <b>Hypothetical protein</b>                                                                                                                          | <b>4926419</b> | <b>4926589</b> | <b>171</b>  | <b>-3</b> | <b>58</b>                     | <b>-3.49</b>      | <b>5.83e-12</b>        |
| plu4214          | CDS        | -            | Putative type VI secretion system IcmF, C-terminal (domains IPR010623 and IPR009612)                                                                 | 4927191        | 4930550        | 3360        | -2        | 168                           | -2.46             | 1.77e-11               |
| plu4215          | CDS        | -            | Conserved hypothetical protein. Putative membrane protein.                                                                                           | 4930543        | 4931718        | 1176        | -1        | 80                            | -2.60             | 2.42e-9                |
| plu4216          | CDS        | -            | Conserved hypothetical protein                                                                                                                       | 4931721        | 4931996        | 276         | -2        | 46                            | -2.72             | 9.79e-8                |
| plu4217          | CDS        | -            | Conserved hypothetical protein. Putative membrane protein                                                                                            | 4932024        | 4932692        | 669         | -2        | 88                            | -3.03             | 1.65e-11               |
| plu4218          | CDS        | -            | Conserved hypothetical protein. Putative membrane protein.                                                                                           | 4932878        | 4933867        | 990         | -3        | 255                           | -1.49             | 9.38e-5                |
| plu4219          | CDS        | -            | Conserved hypothetical protein. Putative membrane protein.                                                                                           | 4933945        | 4934955        | 1011        | -1        | 339                           | -1.25             | 4.69e-4                |
| <b>plu4220##</b> | <b>CDS</b> | <b>-</b>     | <b>Conserved hypothetical protein with SANT/Myb DNA-binding domain (IPR001005)</b>                                                                   | <b>4934952</b> | <b>4937552</b> | <b>2601</b> | <b>-2</b> | <b>531</b>                    | <b>-3.14</b>      | <b>8.62e-29</b>        |
| <b>plu4221##</b> | <b>CDS</b> | <b>-</b>     | <b>Conserved hypothetical protein</b>                                                                                                                | <b>4937552</b> | <b>4938592</b> | <b>1041</b> | <b>-3</b> | <b>144</b>                    | <b>-4.69</b>      | <b>1.26e-27</b>        |
| <b>plu4222##</b> | <b>CDS</b> | <b>-</b>     | <b>Putative Type VI secretion system, RhsGE-associated Vgr protein (domain IPR006533)</b>                                                            | <b>4938603</b> | <b>4940981</b> | <b>2379</b> | <b>-2</b> | <b>310</b>                    | <b>-4.93</b>      | <b>3.17e-43</b>        |
| <b>plu4223##</b> | <b>CDS</b> | <b>-</b>     | <b>Putative type VI secretion ATPase, ClpV1 family</b>                                                                                               | <b>4940978</b> | <b>4943659</b> | <b>2682</b> | <b>-3</b> | <b>657</b>                    | <b>-4.73</b>      | <b>4.59e-57</b>        |
| <b>plu4224##</b> | <b>CDS</b> | <b>-</b>     | <b>Putative Outer membrane protein, OmpA/MotB, C-terminal (domain IPR006665)</b>                                                                     | <b>4943908</b> | <b>4945584</b> | <b>1677</b> | <b>-1</b> | <b>576</b>                    | <b>-5.36</b>      | <b>2.02e-62</b>        |
| <b>plu4225##</b> | <b>CDS</b> | <b>-</b>     | <b>conserved hypothetical protein. Putative membrane protein</b>                                                                                     | <b>4945601</b> | <b>4946245</b> | <b>645</b>  | <b>-3</b> | <b>380</b>                    | <b>-5.98</b>      | <b>4.15e-57</b>        |
| <b>plu4226##</b> | <b>CDS</b> | <b>-</b>     | <b>Putative Type VI secretion protein, VC_A0114 (domain IPR010263)</b>                                                                               | <b>4946288</b> | <b>4947649</b> | <b>1362</b> | <b>-3</b> | <b>689</b>                    | <b>-5.82</b>      | <b>1.58e-73</b>        |
| <b>plu4227##</b> | <b>CDS</b> | <b>-</b>     | <b>Putative Type VI secretion protein, EvpB/VC_A0108, tail sheath (domain IPR010269)</b>                                                             | <b>4947666</b> | <b>4949198</b> | <b>1533</b> | <b>-2</b> | <b>1092</b>                   | <b>-6.26</b>      | <b>2.72e-94</b>        |
| <b>plu4291##</b> | <b>CDS</b> | <b>-</b>     | <b>conserved hypothetical protein</b>                                                                                                                | <b>5018093</b> | <b>5019289</b> | <b>1197</b> | <b>2</b>  | <b>160</b>                    | <b>-3.27</b>      | <b>8.02e-17</b>        |
| plu4558          | CDS        | ecfJ         | Function unknown; rpoE regulon; periplasmic protein; expressed protein (by similarity)                                                               | 5321428        | 5321982        | 555         | 1         | 1696                          | -1.09             | 2.92e-4                |
| plu4748          | CDS        | -            | Conserved hypothetical protein; putative secreted protein                                                                                            | 5528419        | 5529000        | 582         | 1         | 1954                          | -1.10             | 4.69e-4                |



**Supplementary Table 2B** : List of 64 genes differentially expressed between *P. luminescens* TT01 wild-type strain and its isogenic *phoP* mutant in low Mg<sup>2+</sup> culture (logarithmic phase, FDR≤0.005, abs(log2FC)≥1)  
 ## indicates the genes belonging to the core PhoP regulon  
 \* ratio phoP/WT

| Label            | Type       | Name         | Product                                                                                                          | Begin          | End            | Length      | Frame     | normalized average read count | log2 fold change* | adjusted pvalue (FDR) |
|------------------|------------|--------------|------------------------------------------------------------------------------------------------------------------|----------------|----------------|-------------|-----------|-------------------------------|-------------------|-----------------------|
| plu0158          | CDS        | amt          | L-arginine:lysine amidinotransferase                                                                             | 163665         | 164765         | 1101        | 3         | 836                           | -1.64             | 2.49e-4               |
| plu0159          | CDS        | -            | conserved hypothetical protein                                                                                   | 164775         | 165785         | 1011        | 3         | 166                           | -1.56             | 3.30e-3               |
| plu0261          | CDS        | madA         | fimbrial protein MadA                                                                                            | 277866         | 278471         | 606         | 3         | 145                           | 2.09              | 5.06e-5               |
| plu0655          | CDS        | prtA         | Serralysin-type metalloprotease, PrtA                                                                            | 752825         | 754267         | 1443        | 2         | 8176                          | -1.17             | 3.69e-3               |
| plu0656          | CDS        | inh          | Serralysin-type metalloprotease PrtA inhibitor, Inh                                                              | 754322         | 754726         | 405         | 2         | 1136                          | -1.56             | 5.74e-4               |
| plu0657          | CDS        | prtB         | ATP-binding protein PrtB                                                                                         | 754786         | 756516         | 1731        | 1         | 1779                          | -1.61             | 2.15e-4               |
| plu0658          | CDS        | prtC         | Membrane Fusion Protein PrtC                                                                                     | 756583         | 757911         | 1329        | 1         | 964                           | -1.59             | 4.01e-4               |
| plu0659          | CDS        | prtD         | Outer membrane protein PrtD                                                                                      | 757911         | 759287         | 1377        | 3         | 734                           | -1.41             | 4.02e-3               |
| <b>plu0691##</b> | <b>CDS</b> | <b>cutF</b>  | <b>Copper homeostasis protein CutF precursor</b>                                                                 | <b>794390</b>  | <b>795061</b>  | <b>672</b>  | <b>2</b>  | <b>562</b>                    | <b>-2.06</b>      | <b>2.01e-6</b>        |
| plu1235          | CDS        | -            | putative sigma-70 factor, ECF subfamily                                                                          | 1427552        | 1428052        | 501         | -3        | 45                            | 2.52              | 6.33e-4               |
| plu1369          | CDS        | -            | Putative metal-dependent beta-lactamase                                                                          | 1641988        | 1642788        | 801         | 1         | 66                            | -2.04             | 1.14e-3               |
| plu1574          | CDS        | -            | Conserved hypothetical protein                                                                                   | 1881043        | 1881897        | 855         | -1        | 1159                          | -1.60             | 4.01e-4               |
| <b>plu1579##</b> | <b>CDS</b> | -            | <b>putative bacitracin transport permease YbjG of Escherichia coli</b>                                           | <b>1888106</b> | <b>1888714</b> | <b>609</b>  | <b>-3</b> | <b>232</b>                    | <b>-2.68</b>      | <b>1.50e-9</b>        |
| plu1843          | CDS        | mgtC         | -                                                                                                                | 2190810        | 2191520        | 711         | 3         | 320                           | 1.83              | 1.09e-4               |
| plu1915          | CDS        | flgB         | Flagellar basal-body rod protein FlgB (Putative proximal rod protein)                                            | 2281971        | 2282384        | 414         | 3         | 47                            | 2.43              | 1.22e-3               |
| plu1969          | CDS        | dsdX         | DsdX permease                                                                                                    | 2341397        | 2342734        | 1338        | 2         | 1200                          | 2.74              | 4.14e-11              |
| plu1970          | CDS        | dsdA         | D-serine dehydratase DsdA                                                                                        | 2343419        | 2344750        | 1332        | 2         | 1052                          | 1.60              | 5.74e-4               |
| plu2227          | CDS        | ynfK         | Putative dethiobiotin synthetase YnfK of Escherichia coli                                                        | 2620291        | 2620998        | 708         | 1         | 77                            | -1.82             | 2.92e-3               |
| plu2256          | CDS        | -            | conserved hypothetical protein                                                                                   | 2649009        | 2649305        | 297         | 3         | 787                           | -1.54             | 6.33e-4               |
| plu2336          | CDS        | -            | -                                                                                                                | 2751654        | 2753417        | 1764        | -2        | 282                           | -1.76             | 7.34e-5               |
| <b>plu2480##</b> | <b>CDS</b> | <b>ail1</b>  | <b>Ail protein precursor of Yersinia</b>                                                                         | <b>2920701</b> | <b>2921228</b> | <b>528</b>  | <b>-2</b> | <b>1106</b>                   | <b>-1.56</b>      | <b>6.33e-4</b>        |
| plu2631          | CDS        | -            | -                                                                                                                | 3081215        | 3081412        | 198         | 2         | 588                           | 1.79              | 1.05e-4               |
| <b>plu2657##</b> | <b>CDS</b> | <b>pbpP4</b> | <b>Conserved hypothetical protein PbpP4</b>                                                                      | <b>3110057</b> | <b>3110950</b> | <b>894</b>  | <b>-3</b> | <b>279</b>                    | <b>-1.74</b>      | <b>5.14e-4</b>        |
| <b>plu2658##</b> | <b>CDS</b> | <b>pbpP3</b> | <b>UDP-L-Ara4N formyltransferase ; UDP-GlcA C-4'-decarboxylase PbpP3</b>                                         | <b>3110950</b> | <b>3112932</b> | <b>1983</b> | <b>-1</b> | <b>566</b>                    | <b>-2.16</b>      | <b>1.41e-6</b>        |
| <b>plu2659##</b> | <b>CDS</b> | <b>pbpP2</b> | <b>undecaprenyl phosphate-L-Ara4FN transferase PbpP2</b>                                                         | <b>3112933</b> | <b>3113910</b> | <b>978</b>  | <b>-1</b> | <b>171</b>                    | <b>-2.59</b>      | <b>1.30e-7</b>        |
| <b>plu2660##</b> | <b>CDS</b> | <b>pbpP1</b> | <b>UDP-4-amino-4-deoxy-L-arabinose--oxoglutarate aminotransferase PbpP1</b>                                      | <b>3113911</b> | <b>3115056</b> | <b>1146</b> | <b>-1</b> | <b>249</b>                    | <b>-2.18</b>      | <b>4.17e-6</b>        |
| plu2999          | CDS        | cbiA         | Cobyrinic acid A,C-diamide synthase                                                                              | 3499135        | 3500517        | 1383        | -1        | 84                            | -2.27             | 3.61e-5               |
| plu3067          | CDS        | -            | conserved hypothetical protein                                                                                   | 3575125        | 3575667        | 543         | -1        | 359                           | -1.65             | 3.20e-4               |
| plu3075          | CDS        | phaxA2       | PhaxA2, similar to binary toxin XaxA of Xenorhabdus nematophila                                                  | 3585640        | 3586866        | 1227        | 1         | 406                           | -1.96             | 3.75e-6               |
| plu3076          | CDS        | phaxB2       | PhaxB2, similar to binary toxin XaxB of Xenorhabdus nematophila                                                  | 3586913        | 3587974        | 1062        | 2         | 393                           | -1.84             | 1.96e-5               |
| plu3129          | CDS        | -            | conserved hypothetical protein                                                                                   | 3677817        | 3678092        | 276         | 3         | 124                           | -1.58             | 4.40e-3               |
| plu3134          | CDS        | -            | putative 4-hydroxybenzoate transporter                                                                           | 3692924        | 3694246        | 1323        | -3        | 182                           | -1.89             | 7.34e-5               |
| plu3512          | CDS        | -            | Some similarities with energy transducer TonB. Putative secreted protein                                         | 4104111        | 4104878        | 768         | -2        | 396                           | 1.44              | 4.40e-3               |
| plu3513          | CDS        | -            | Putative TonB-receptor                                                                                           | 4104961        | 4108005        | 3045        | -1        | 1659                          | 1.56              | 5.74e-4               |
| plu3514          | CDS        | -            | conserved hypothetical protein                                                                                   | 4108262        | 4109761        | 1500        | -3        | 881                           | 1.85              | 5.08e-5               |
| plu3595          | CDS        | -            | -                                                                                                                | 4242432        | 4242791        | 360         | -2        | 60                            | 2.64              | 1.82e-4               |
| <b>plu3736##</b> | <b>CDS</b> | <b>mgtE</b>  | <b>Magnesium transport protein MgtE</b>                                                                          | <b>4405167</b> | <b>4406237</b> | <b>1071</b> | <b>-2</b> | <b>1920</b>                   | <b>-2.20</b>      | <b>1.12e-7</b>        |
| plu3795          | CDS        | -            | conserved hypothetical protein                                                                                   | 4459644        | 4460093        | 450         | -2        | 1079                          | -2.00             | 7.12e-6               |
| plu3923          | CDS        | -            | -                                                                                                                | 4601127        | 4601714        | 588         | -2        | 300                           | -1.53             | 2.70e-3               |
| <b>plu3988##</b> | <b>CDS</b> | -            | <b>conserved hypothetical protein</b>                                                                            | <b>4674261</b> | <b>4675196</b> | <b>936</b>  | <b>3</b>  | <b>128</b>                    | <b>-7.23</b>      | <b>3.73e-27</b>       |
| plu4084          | CDS        | -            | putative transport protein and multidrug resistance protein like bicyclomycin resistance protein                 | 4770938        | 4772125        | 1188        | -3        | 93                            | 2.49              | 4.24e-5               |
| <b>plu4210##</b> | <b>CDS</b> | -            | <b>Conserved hypothetical protein with SANT/Myb DNA-binding domain (IPR001005)</b>                               | <b>4923248</b> | <b>4925854</b> | <b>2607</b> | <b>-3</b> | <b>228</b>                    | <b>-1.98</b>      | <b>4.24e-5</b>        |
| <b>plu4211##</b> | <b>CDS</b> | -            | <b>Putative Type VI secretion system effector, Hcp (IPR008514)</b>                                               | <b>4925955</b> | <b>4926446</b> | <b>492</b>  | <b>-2</b> | <b>280</b>                    | <b>-3.43</b>      | <b>5.51e-15</b>       |
| <b>plu4212##</b> | <b>CDS</b> | -            | <b>Hypothetical protein</b>                                                                                      | <b>4926419</b> | <b>4926589</b> | <b>171</b>  | <b>-3</b> | <b>40</b>                     | <b>-3.83</b>      | <b>2.57e-7</b>        |
| <b>plu4220##</b> | <b>CDS</b> | -            | <b>Conserved hypothetical protein with SANT/Myb DNA-binding domain (IPR001005)</b>                               | <b>4934952</b> | <b>4937552</b> | <b>2601</b> | <b>-2</b> | <b>176</b>                    | <b>-1.97</b>      | <b>1.68e-4</b>        |
| <b>plu4221##</b> | <b>CDS</b> | -            | <b>Conserved hypothetical protein</b>                                                                            | <b>4937552</b> | <b>4938592</b> | <b>1041</b> | <b>-3</b> | <b>44</b>                     | <b>-2.66</b>      | <b>4.01e-4</b>        |
| <b>plu4222##</b> | <b>CDS</b> | -            | <b>Putative Type VI secretion system, RhsGE-associated Vgr protein (domain IPR006533)</b>                        | <b>4938603</b> | <b>4940981</b> | <b>2379</b> | <b>-2</b> | <b>84</b>                     | <b>-2.80</b>      | <b>2.45e-6</b>        |
| <b>plu4223##</b> | <b>CDS</b> | -            | <b>Putative type VI secretion ATPase, ClpV1 family</b>                                                           | <b>4940978</b> | <b>4943659</b> | <b>2682</b> | <b>-3</b> | <b>147</b>                    | <b>-3.19</b>      | <b>2.14e-10</b>       |
| <b>plu4224##</b> | <b>CDS</b> | -            | <b>Putative Outer membrane protein, OmpA/MotB, C-terminal (domain IPR006665)</b>                                 | <b>4943908</b> | <b>4945584</b> | <b>1677</b> | <b>-1</b> | <b>231</b>                    | <b>-4.80</b>      | <b>1.10e-23</b>       |
| <b>plu4225##</b> | <b>CDS</b> | -            | <b>conserved hypothetical protein. Putative membrane protein</b>                                                 | <b>4945601</b> | <b>4946245</b> | <b>645</b>  | <b>-3</b> | <b>144</b>                    | <b>-4.95</b>      | <b>2.76e-20</b>       |
| <b>plu4226##</b> | <b>CDS</b> | -            | <b>Putative Type VI secretion protein, VC_A0114 (domain IPR010263)</b>                                           | <b>4946288</b> | <b>4947649</b> | <b>1362</b> | <b>-3</b> | <b>244</b>                    | <b>-4.21</b>      | <b>5.04e-20</b>       |
| <b>plu4227##</b> | <b>CDS</b> | -            | <b>Putative Type VI secretion protein, EvpB/VC_A0108, tail sheath (domain IPR010269)</b>                         | <b>4947666</b> | <b>4949198</b> | <b>1533</b> | <b>-2</b> | <b>292</b>                    | <b>-4.59</b>      | <b>1.10e-23</b>       |
| plu4253          | CDS        | yjiZ         | -                                                                                                                | 4975792        | 4976004        | 213         | -1        | 315                           | 1.58              | 1.50e-3               |
| <b>plu4291##</b> | <b>CDS</b> | -            | <b>conserved hypothetical protein</b>                                                                            | <b>5018093</b> | <b>5019289</b> | <b>1197</b> | <b>2</b>  | <b>133</b>                    | <b>-2.80</b>      | <b>1.05e-8</b>        |
| plu4446          | CDS        | fecA         | Iron(III) dicitrate outer membrane transporter precursor protein FecA                                            | 5194611        | 5196971        | 2361        | 3         | 97                            | 2.09              | 4.01e-4               |
| plu4565          | CDS        | pcfD         | Carbamoyl transferase, NodU family, involved in the induction of Photorhabdus cell clumping                      | 5329532        | 5331229        | 1698        | -3        | 591                           | -2.01             | 1.80e-6               |
| plu4566          | CDS        | pcfC         | Glycine amidinotransferase, involved in the induction of Photorhabdus cell clumping                              | 5331253        | 5332056        | 804         | -1        | 186                           | -1.82             | 1.21e-4               |
| plu4567          | CDS        | pcfB         | Argininosuccinate synthase, involved in the induction of Photorhabdus cell clumping                              | 5332053        | 5333243        | 1191        | -2        | 155                           | -1.51             | 4.02e-3               |
| plu4568          | CDS        | pcfA         | cysteine synthase, O-acetylserine sulfhydrylase subunit, involved in the induction of Photorhabdus cell clumping | 5333233        | 5334261        | 1029        | -1        | 155                           | -1.82             | 2.53e-4               |
| plu4627          | CDS        | fhuF         | Ferric iron reductase protein FhuF                                                                               | 5393763        | 5394542        | 780         | 3         | 236                           | 1.77              | 2.53e-4               |
| plu4797          | CDS        | wblB         | Myo-inositol 2-dehydrogenase (WblB protein)                                                                      | 5571065        | 5572114        | 1050        | 2         | 572                           | -1.36             | 3.94e-3               |
| plu4809          | CDS        | wblM         | WblM protein                                                                                                     | 5583742        | 5585616        | 1875        | 1         | 258                           | -1.42             | 4.40e-3               |
| plu4813          | CDS        | wblQ         | WblQ protein                                                                                                     | 5589089        | 5590216        | 1128        | 2         | 90                            | 1.98              | 1.09e-3               |
| plu4814          | CDS        | wzxB         | WzxB protein                                                                                                     | 5590261        | 5591466        | 1206        | 1         | 104                           | 2.03              | 5.74e-4               |

**Supplementary Table 2C** : List of the 21 genes belonging to the core PhoP regulon of *P. luminescens* TT01

# # indicates the genes belonging to the core PhoP regulon

\* ratio phoP/WT

| Label     | Type | Name  | Product                                                                            | log2 fold change*<br>LB culture<br>RNA-Seq | log2 fold change*<br>LB culture<br>RT-qPCR | log2 fold change*<br>Low Mg2+<br>RNA-Seq | log2 fold change*<br>Low Mg2+<br>RT-qPCR |
|-----------|------|-------|------------------------------------------------------------------------------------|--------------------------------------------|--------------------------------------------|------------------------------------------|------------------------------------------|
| plu0691## | CDS  | cutF  | Copper homeostasis protein CutF precursor                                          | -1.98                                      | -1.86                                      | -2.06                                    | -2.09                                    |
| plu1579## | CDS  | -     | putative bacitracin transport permease YbjG of Escherichia coli                    | -2.07                                      |                                            | -2.68                                    |                                          |
| plu2480## | CDS  | ail1  | Ail protein precursor of Yersinia                                                  | -2.37                                      | -2.26                                      | -1.56                                    | -2.32                                    |
| plu2657## | CDS  | pbgP4 | Conserved hypothetical protein PbgP4                                               | -1.88                                      |                                            | -1.74                                    |                                          |
| plu2658## | CDS  | pbgP3 | UDP-L-Ara4N formyltransferase ; UDP-GlcA C-4'-decarboxylase PbgP3                  | -2.20                                      |                                            | -2.16                                    |                                          |
| plu2659## | CDS  | pbgP2 | undecaprenyl phosphate-L-Ara4FN transferase PbgP2                                  | -2.36                                      |                                            | -2.59                                    |                                          |
| plu2660## | CDS  | pbgP1 | UDP-4-amino-4-deoxy-L-arabinose--oxoglutarate aminotransferase PbgP1               | -2.70                                      | -4.21                                      | -2.18                                    | -3.68                                    |
| plu3736## | CDS  | mgfE  | Magnesium transport protein MgfE                                                   | -3.98                                      | -4.06                                      | -2.20                                    | -4.76                                    |
| plu3988## | CDS  | -     | conserved hypothetical protein                                                     | -6.57                                      | -7.16                                      | -7.23                                    | -7.16                                    |
| plu4210## | CDS  | -     | Conserved hypothetical protein with SANT/Myb DNA-binding domain (IPR001005)        | -1.94                                      |                                            | -1.98                                    |                                          |
| plu4211## | CDS  | -     | Putative Type VI secretion system effector, Hcp (IPR008514)                        | -3.05                                      | -2.82                                      | -3.43                                    | -3.7                                     |
| plu4212## | CDS  | -     | Hypothetical protein                                                               | -3.49                                      |                                            | -3.83                                    |                                          |
| plu4220## | CDS  | -     | Conserved hypothetical protein with SANT/Myb DNA-binding domain (IPR001005)        | -3.14                                      |                                            | -1.97                                    |                                          |
| plu4221## | CDS  | -     | Conserved hypothetical protein                                                     | -4.69                                      |                                            | -2.66                                    |                                          |
| plu4222## | CDS  | -     | Putative Type VI secretion system, RhsGE-associated Vgr protein (domain IPR006533) | -4.93                                      |                                            | -2.80                                    |                                          |
| plu4223## | CDS  | -     | Putative type VI secretion ATPase, ClpV1 family                                    | -4.73                                      |                                            | -3.19                                    |                                          |
| plu4224## | CDS  | -     | Putative Outer membrane protein, OmpA/MotB, C-terminal (domain IPR006665)          | -5.36                                      |                                            | -4.80                                    |                                          |
| plu4225## | CDS  | -     | conserved hypothetical protein. Putative membrane protein                          | -5.98                                      |                                            | -4.95                                    |                                          |
| plu4226## | CDS  | -     | Putative Type VI secretion protein, VC_A0114 (domain IPR010263)                    | -5.82                                      |                                            | -4.21                                    |                                          |
| plu4227## | CDS  | -     | Putative Type VI secretion protein, EvpB/VC_A0108, tail sheath (domain IPR010269)  | -6.26                                      | -6.96                                      | -4.59                                    | -6.06                                    |
| plu4291## | CDS  | -     | conserved hypothetical protein                                                     | -3.27                                      |                                            | -2.80                                    |                                          |

**Supplementary Table 3A:** List of 445 genes differentially expressed in *P. luminescens* TT01 between LB culture and LB+polyB culture (logarithmic phase, FDR≤0.005, abs(log2FC)≥1)  
 # indicates the genes belonging to the PhoP regulon in LB broth.  
 #\* indicates the genes belonging to the core PhoP regulon.

\* ratio LB+polyB/LB  
 fit some functional categories:  
 components of secretion system (33 genes)  
 insecticidal toxins (9 genes)  
 transporter (25 genes)  
 extracellular enzymes

| Label       | Type | Name  | Product                                                                                                                                                         | COG_ID  | COG_classID | COGClassDescription                                                                                     | Begin  | End    | normalized average read count | log2 fold change* | adjusted p-value (FDR) |
|-------------|------|-------|-----------------------------------------------------------------------------------------------------------------------------------------------------------------|---------|-------------|---------------------------------------------------------------------------------------------------------|--------|--------|-------------------------------|-------------------|------------------------|
| plu0008     | CDS  | ogrK  | Ogr protein; transcriptional activator for bacteriophage P2 late genes                                                                                          |         |             | Unclassified                                                                                            | 10251  | 10472  | 45                            | -1.99             | 8.01e-4                |
| plu0010     | CDS  | pts25 | Phage tail protein                                                                                                                                              | COG3499 | X           | Mobilome: prophages, transposons                                                                        | 11631  | 12095  | 71                            | -1.83             | 5.66e-4                |
| plu0011     | CDS  | pts24 | Phage tail protein                                                                                                                                              | COG5283 | X           | Mobilome: prophages, transposons                                                                        | 12098  | 14536  | 382                           | -3.55             | 7.26e-26               |
| plu0012     | CDS  | pts23 | Phage tail protein                                                                                                                                              |         |             | Unclassified                                                                                            | 14517  | 14636  | 75                            | -5.20             | 6.86e-19               |
| plu0013     | CDS  | pts22 | Phage tail protein                                                                                                                                              |         |             | Unclassified                                                                                            | 14651  | 14968  | 404                           | -5.40             | 4.19e-49               |
| plu0014     | CDS  | pts21 | Major phage tail tube protein                                                                                                                                   | COG3498 | X           | Mobilome: prophages, transposons                                                                        | 14995  | 15510  | 670                           | -5.12             | 1.47e-55               |
| plu0015     | CDS  | pts20 | Major phage tail sheath protein                                                                                                                                 | COG3497 | X           | Mobilome: prophages, transposons                                                                        | 15521  | 16693  | 1243                          | -5.87             | 1.78e-81               |
| plu0019     | CDS  | pts16 | Tail fiber assembly protein<br>Alternative tail fiber protein of bacteriophage-related plasmid and bacteriophage                                                | COG2110 | J           | biogenesis                                                                                              | 18438  | 19034  | 127                           | -1.79             | 2.08e-5                |
| plu0020     | CDS  | pts15 | Tail fiber protein of bacteriophage                                                                                                                             | COG4675 | S           | Function unknown                                                                                        | 19034  | 19522  | 89                            | -1.68             | 1.19e-3                |
| plu0021     | CDS  | pts14 | Phage tail protein                                                                                                                                              | COG5301 | X           | Mobilome: prophages, transposons                                                                        | 19522  | 20649  | 145                           | -2.10             | 1.45e-6                |
| plu0022     | CDS  | pts13 | Phage tail protein                                                                                                                                              | COG4385 | X           | Mobilome: prophages, transposons                                                                        | 20646  | 21260  | 82                            | -2.31             | 1.27e-6                |
| plu0023     | CDS  | pts12 | Phage baseplate assembly protein                                                                                                                                | COG3948 | X           | Mobilome: prophages, transposons                                                                        | 21253  | 22251  | 132                           | -2.59             | 4.16e-10               |
| plu0024     | CDS  | pts11 | Phage baseplate assembly protein                                                                                                                                | COG3628 | X           | Mobilome: prophages, transposons                                                                        | 22256  | 22597  | 54                            | -2.98             | 8.39e-9                |
| plu0025     | CDS  | pts10 | Phage-related baseplate assembly protein                                                                                                                        | COG4540 | X           | Mobilome: prophages, transposons                                                                        | 22597  | 23439  | 98                            | -3.47             | 6.24e-14               |
| plu0026     | CDS  | pts9  | Phage tail protein                                                                                                                                              | COG5004 | X           | Mobilome: prophages, transposons                                                                        | 23936  | 24139  | 35                            | -3.96             | 1.48e-10               |
| plu0052     | CDS  | asnA  | Aspartate--ammonia ligase (Asparagine synthetase A)                                                                                                             | COG2502 | E           | Amino acid transport and metabolism                                                                     | 46030  | 47022  | 637                           | 1.92              | 1.04e-9                |
| plu0072     | CDS  | yjCG  | -                                                                                                                                                               | COG4147 | C           | Energy production and conversion                                                                        | 69280  | 70929  | 370                           | 1.41              | 3.72e-5                |
| plu0073     | CDS  | yjCH  | -                                                                                                                                                               | COG3162 | S           | Function unknown                                                                                        | 70926  | 71237  | 34                            | 2.02              | 6.47e-4                |
| plu0074     | CDS  | acs   | acetyl-coenzyme A synthetase (acetate--COA ligase) [acyl-activating enzyme]                                                                                     | COG0365 | I           | Lipid transport and metabolism                                                                          | 71302  | 73257  | 1315                          | 1.92              | 3.29e-14               |
| plu0082     | CDS  | -     | conserved hypothetical protein                                                                                                                                  | COG5572 | S           | Function unknown                                                                                        | 78376  | 78669  | 174                           | 1.22              | 4.44e-3                |
| plu0100     | CDS  | pckA  | phosphoenolpyruvate carboxykinase [ATP]                                                                                                                         | COG1866 | C           | Energy production and conversion                                                                        | 96415  | 98034  | 1188                          | 1.13              | 1.24e-5                |
| plu0104#    | CDS  | -     | Conserved hypothetical secreted protein                                                                                                                         | COG3193 | S           | Function unknown                                                                                        | 101566 | 102060 | 166                           | -6.83             | 1.21e-36               |
| plu0112     | CDS  | cynS  | cyanate lyase (cyanate hydrolase) (cyanase)                                                                                                                     | COG1513 | P           | metabolism                                                                                              | 115374 | 115844 | 157                           | 1.23              | 4.63e-3                |
| plu0121     | CDS  | uspA  | universal stress protein A                                                                                                                                      | COG0589 | T           | Signal transduction mechanisms                                                                          | 126961 | 127392 | 1033                          | 1.11              | 3.98e-5                |
| plu0157     | CDS  | cipB  | Crystalline inclusion protein CipB                                                                                                                              |         |             | Unclassified                                                                                            | 162599 | 162901 | 68                            | -2.21             | 4.00e-4                |
| plu0158     | CDS  | amt   | L-arginine:lysine amidinotransferase                                                                                                                            | COG1834 | E           | Amino acid transport and metabolism                                                                     | 163665 | 164765 | 79                            | -2.80             | 1.50e-8                |
| plu0162     | CDS  | -     | conserved hypothetical protein                                                                                                                                  | COG1680 | V           | Defense mechanisms                                                                                      | 168154 | 169746 | 218                           | -1.69             | 3.41e-5                |
| plu0163     | CDS  | -     | conserved hypothetical protein                                                                                                                                  | COG1680 | V           | Defense mechanisms                                                                                      | 169909 | 170412 | 8.83                          | -3.15             | 1.99e-3                |
| plu0165     | CDS  | -     | conserved hypothetical protein                                                                                                                                  | COG1680 | V           | Defense mechanisms                                                                                      | 172935 | 174524 | 92                            | -2.11             | 2.21e-5                |
| plu0182     | CDS  | cpmA  | CpmA protein involved in carbapenem biosynthesis                                                                                                                | COG0367 | E           | Amino acid transport and metabolism                                                                     | 192436 | 193941 | 1786                          | -1.30             | 8.04e-7                |
| plu0183     | CDS  | cpmB  | CpmB protein involved in carbapenem biosynthesis                                                                                                                | COG1024 | I           | Lipid transport and metabolism<br>Secondary metabolites biosynthesis,                                   | 193944 | 194693 | 1082                          | -1.09             | 5.50e-5                |
| plu0184     | CDS  | cpmC  | CpmC protein involved in carbapenem biosynthesis                                                                                                                | COG2175 | Q           | transport and catabolism<br>Inorganic ion transport and                                                 | 194707 | 195528 | 1562                          | -1.04             | 5.23e-5                |
| plu0208     | CDS  | feoB  | ferrous iron transport protein B                                                                                                                                | COG0370 | P           | metabolism<br>Inorganic ion transport and                                                               | 211862 | 214174 | 703                           | 1.36              | 1.84e-5                |
| plu0209     | CDS  | feoA  | ferrous iron transport protein A                                                                                                                                | COG1918 | P           | metabolism<br>Inorganic ion transport and                                                               | 214227 | 214460 | 195                           | 1.56              | 1.63e-4                |
| plu0221     | CDS  | -     | putative amino acid permease component of ABC transporter                                                                                                       | COG0765 | E           | Amino acid transport and metabolism                                                                     | 227701 | 228444 | 551                           | -1.16             | 9.56e-4                |
| plu0224     | CDS  | -     | conserved hypothetical protein                                                                                                                                  |         |             | Unclassified                                                                                            | 229778 | 230323 | 189                           | 2.83              | 4.45e-14               |
| plu0225     | CDS  | -     | Putative TpsA-related protein                                                                                                                                   | COG3210 | U           | Intracellular trafficking, secretion, and vesicular transport                                           | 230329 | 235488 | 737                           | 3.62              | 7.75e-35               |
| plu0226     | CDS  | -     | TpsB protein                                                                                                                                                    | COG2831 | U           | vesicular transport<br>Cell wall/membrane/envelope                                                      | 235518 | 237197 | 176                           | 4.53              | 3.48e-25               |
| plu0228     | CDS  | -     | conserved hypothetical protein<br>putative TRP-1 protein encoded by the toxA gene of Burkholderia glumae, methyltransferase involved in toxoflavin biosynthesis | COG1807 | M           | biogenesis                                                                                              | 237589 | 239052 | 472                           | 1.16              | 6.75e-4                |
| plu0250     | CDS  | -     | Conserved hypothetical protein                                                                                                                                  | COG4976 | R           | General function prediction only                                                                        | 267752 | 268495 | 64                            | -2.10             | 1.32e-4                |
| plu0300     | CDS  | dppA  | Periplasmic dipeptide transport protein precursor DppA                                                                                                          | COG0747 | E           | Amino acid transport and metabolism<br>Amino acid transport and metabolism, inorganic ion transport and | 317950 | 319557 | 852                           | 2.15              | 7.06e-16               |
| plu0301     | CDS  | dppB  | Dipeptide transport system permease protein DppB                                                                                                                | COG0601 | EP          | metabolism<br>Amino acid transport and metabolism, inorganic ion transport and                          | 319676 | 320695 | 249                           | 1.99              | 1.21e-8                |
| plu0302     | CDS  | dppC  | Dipeptide transport system permease protein DppC                                                                                                                | COG1173 | EP          | metabolism<br>Amino acid transport and metabolism, inorganic ion transport and                          | 320706 | 321605 | 345                           | 1.80              | 2.56e-8                |
| plu0303     | CDS  | dppD  | Dipeptide transport ATP-binding protein dppD                                                                                                                    | COG0444 | EP          | metabolism<br>Amino acid transport and metabolism, inorganic ion transport and                          | 321618 | 322598 | 269                           | 2.00              | 9.47e-9                |
| plu0304     | CDS  | dppF  | Dipeptide transport ATP-binding protein dppF                                                                                                                    | COG4608 | E           | Amino acid transport and metabolism                                                                     | 322595 | 323614 | 414                           | 1.33              | 7.85e-5                |
| plu0315     | CDS  | -     | conserved hypothetical protein                                                                                                                                  |         |             | Unclassified                                                                                            | 333297 | 333845 | 67                            | -1.64             | 2.38e-3                |
| plu0318     | CDS  | -     | Putative ADA protein                                                                                                                                            |         |             | Unclassified                                                                                            | 341028 | 341618 | 145                           | -1.92             | 5.26e-5                |
| plu0358     | CDS  | -     | Putative Type VI secretion, VsaB, ImpH, VC_A0111 (IPR010732 domain)                                                                                             | COG3520 | U           | Intracellular trafficking, secretion, and vesicular transport                                           | 395492 | 396472 | 244                           | -1.42             | 4.12e-5                |
| plu0369     | CDS  | -     | Putative type VI secretion system, VCA0110 (domain IPR010272)<br>Conserved hypothetical protein with basic-leucine zipper domain (IPR04827)                     | COG3519 | U           | vesicular transport<br>Intracellular trafficking, secretion, and                                        | 396508 | 398355 | 679                           | -1.25             | 8.14e-6                |
| plu0370     | CDS  | -     | Conserved hypothetical protein                                                                                                                                  | COG3518 | U           | vesicular transport<br>Intracellular trafficking, secretion, and                                        | 398357 | 398797 | 248                           | -1.60             | 7.64e-6                |
| plu0371     | CDS  | -     | Putative type VI secretion protein, EvpB/VC_A0108, tail sheath (domain IPR010269)                                                                               | COG3517 | U           | vesicular transport<br>Intracellular trafficking, secretion, and                                        | 398804 | 400282 | 1379                          | -1.58             | 4.37e-10               |
| plu0372     | CDS  | -     | Putative Type VI secretion system, VtpA, VC_A0107 or Hcp2 (domain IPR008312)                                                                                    | COG3516 | U           | vesicular transport<br>Intracellular trafficking, secretion, and                                        | 400306 | 400803 | 679                           | -1.88             | 1.85e-11               |
| plu0373     | CDS  | -     | Putative Type VI secretion system effector, Hcp (IPR008514)                                                                                                     | COG3157 | U           | vesicular transport                                                                                     | 401704 | 402222 | 5526                          | -2.01             | 1.25e-17               |
| plu0418     | CDS  | -     | Major structural subunit MrpA of Proteus mirabilis                                                                                                              | COG3539 | N           | Cell motility                                                                                           | 447141 | 447707 | 210                           | 1.34              | 1.66e-4                |
| plu0441     | CDS  | -     | conserved hypothetical protein                                                                                                                                  | COG4683 | S           | Function unknown                                                                                        | 472833 | 473132 | 169                           | 1.33              | 3.15e-3                |
| plu0480#    | CDS  | -     | Conserved hypothetical protein with Galactose-binding like domain (IPR008979 domain)                                                                            | COG2273 | G           | Carbohydrate transport and metabolism                                                                   | 520584 | 521060 | 1908                          | -3.34             | 7.36e-39               |
| plu0515     | CDS  | tcac  | B component of insecticidal toxin complex, protein TcaC                                                                                                         | COG3209 | R           | General function prediction only<br>Translation, ribosomal structure and                                | 567083 | 571540 | 381                           | 1.37              | 2.78e-5                |
| plu0525     | CDS  | -     | Similar to probable acetyltransferase                                                                                                                           | COG0456 | J           | biogenesis                                                                                              | 582031 | 582573 | 101                           | 1.97              | 2.08e-5                |
| plu0526     | CDS  | -     | conserved hypothetical protein                                                                                                                                  |         |             | Unclassified                                                                                            | 582534 | 583718 | 96                            | 2.95              | 5.10e-10               |
| pluCD505837 | CDS  | -     | -                                                                                                                                                               |         |             | Unclassified                                                                                            | 583732 | 584238 | 153                           | 1.48              | 6.70e-4                |
| plu0527     | CDS  | -     | conserved hypothetical protein                                                                                                                                  | COG3220 | S           | Function unknown                                                                                        | 584213 | 584992 | 151                           | 2.89              | 2.19e-12               |
| plu0528     | CDS  | -     | Conserved hypothetical protein                                                                                                                                  | COG3220 | S           | Function unknown<br>Intracellular trafficking, secretion, and                                           | 584996 | 586072 | 419                           | 3.69              | 1.42e-29               |
| plu0549     | CDS  | -     | CdiB protein (TpsB family)                                                                                                                                      | COG2831 | U           | vesicular transport                                                                                     | 618550 | 620268 | 37                            | -2.43             | 1.48e-4                |
| plu0578     | CDS  | yaah  | -                                                                                                                                                               | COG1584 | C           | Energy production and conversion                                                                        | 654920 | 655489 | 260                           | -1.30             | 6.42e-5                |
| plu0628     | CDS  | yadB  | -                                                                                                                                                               |         |             | Unclassified                                                                                            | 712917 | 713402 | 181                           | 2.21              | 5.10e-8                |
| plu0634     | CDS  | -     | Toxin secretion ABC transporter protein, HlyB family                                                                                                            | COG2274 | V           | Defense mechanisms<br>Cell wall/membrane/envelope                                                       | 726383 | 728518 | 2133                          | 3.69              | 2.64e-46               |
| plu0635     | CDS  | -     | HlyD family secretion protein                                                                                                                                   | COG0845 | MV          | biogenesis, Defense mechanisms                                                                          | 728660 | 730075 | 589                           | 3.85              | 9.48e-36               |
| plu0636     | CDS  | -     | conserved hypothetical protein                                                                                                                                  |         |             | Unclassified                                                                                            | 730185 | 730706 | 331                           | 3.38              | 1.87e-23               |
| plu0637     | CDS  | -     | conserved hypothetical protein                                                                                                                                  | COG0722 | E           | Amino acid transport and metabolism                                                                     | 730755 | 731276 | 640                           | 3.68              | 2.52e-35               |
| plu0638     | CDS  | -     | conserved hypothetical protein                                                                                                                                  |         |             | Unclassified                                                                                            | 731335 | 731856 | 530                           | 3.60              | 4.90e-31               |
| plu0639     | CDS  | -     | conserved hypothetical protein                                                                                                                                  |         |             | Unclassified                                                                                            | 731915 | 732445 | 698                           | 3.72              | 7.24e-37               |
| plu0640     | CDS  | -     | Conserved hypothetical protein                                                                                                                                  | COG5000 | T           | Signal transduction mechanisms                                                                          | 732504 | 733025 | 1231                          | 3.78              | 1.83e-45               |
| plu0641     | CDS  | -     | conserved hypothetical protein                                                                                                                                  |         |             | Unclassified                                                                                            | 733074 | 733595 | 461                           | 3.93              | 1.02e-35               |
| plu0642     | CDS  | -     | conserved hypothetical protein                                                                                                                                  |         |             | Unclassified                                                                                            | 733644 | 734165 | 1125                          | 3.93              | 7.50e-48               |
| plu0643     | CDS  | -     | Putative transmembrane protein. The central region presents some similarities with proprotein convertase.                                                       | COG1404 | O           | Posttranslational modification, protein turnover, chaperones                                            | 734216 | 740587 | 7912                          | 3.64              | 2.42e-54               |
| pluRNA0744  | RNA  | -     | transfer RNA-Met                                                                                                                                                |         |             | Unclassified                                                                                            | 744628 | 744704 | 740                           | -1.50             | 1.54e-7                |

| plu0691#    | CDS | cutF  | Copper homeostasis protein CutF precursor                                                                   | COG3015 | MV | Cell wall/membrane/envelope biogenesis, Defense mechanisms                                   | 794390  | 795061  | 3705 | 1.60  | 2.51e-10 |
|-------------|-----|-------|-------------------------------------------------------------------------------------------------------------|---------|----|----------------------------------------------------------------------------------------------|---------|---------|------|-------|----------|
| plu0697     | CDS | metN  | D-methionine transport ATP-binding protein MetN                                                             | COG1135 | E  | Amino acid transport and metabolism                                                          | 799779  | 800810  | 345  | -1.09 | 1.27e-3  |
| plu0734     | CDS | -     | conserved hypothetical protein                                                                              | COG1621 | G  | Carbohydrate transport and metabolism                                                        | 841205  | 842320  | 95   | -3.40 | 6.40e-13 |
| plu0760     | CDS | -     | putative acid-CoA ligase and gramicidin S synthase 2                                                        | COG0318 | IQ | Lipid transport and metabolism, Secondary metabolites biosynthesis, transport and catabolism | 878406  | 879983  | 99   | -1.82 | 1.76e-5  |
| plu0761     | CDS | -     | -                                                                                                           | COG0534 | V  | Defense mechanisms                                                                           | 880009  | 881409  | 137  | -1.69 | 1.79e-5  |
| plu0762     | CDS | -     | -                                                                                                           | COG1960 | I  | Lipid transport and metabolism                                                               | 881414  | 882493  | 239  | -1.14 | 4.02e-4  |
| plu0763     | CDS | -     | hypothetical protein                                                                                        | -       | -  | Unclassified                                                                                 | 882486  | 883160  | 177  | -2.12 | 7.13e-9  |
| plu0764     | CDS | -     | hypothetical protein                                                                                        | COG0332 | I  | Lipid transport and metabolism                                                               | 883171  | 884049  | 353  | -2.71 | 1.90e-17 |
| plu0765     | CDS | -     | putative acyl carrier protein                                                                               | COG0236 | IQ | Lipid transport and metabolism, Secondary metabolites biosynthesis, transport and catabolism | 884051  | 884314  | 249  | -2.68 | 6.96e-14 |
| plu0786     | CDS | -     | Conserved hypothetical protein. Probable transmembrane protein with 3 candidate membrane-spanning segments. | COG3539 | N  | Cell motility                                                                                | 905365  | 905925  | 639  | -5.19 | 4.96e-57 |
| plu0787     | CDS | -     | putative fibrial chaperone                                                                                  | COG3121 | W  | Extracellular structures                                                                     | 906027  | 906743  | 55   | -2.60 | 3.13e-7  |
| plu0788     | CDS | -     | conserved hypothetical protein                                                                              | COG3539 | N  | Cell motility                                                                                | 905743  | 907315  | 31   | -2.90 | 6.24e-6  |
| plu0789     | CDS | -     | putative fibrial chaperone                                                                                  | COG3121 | W  | Extracellular structures                                                                     | 907349  | 908098  | 29   | -2.31 | 2.51e-4  |
| plu0824     | CDS | -     | Some similarities with gp31 protein of Bacteriophage                                                        | -       | -  | Unclassified                                                                                 | 955418  | 956575  | 122  | 1.27  | 4.46e-3  |
| plu0842     | CDS | speD  | S-adenosylmethionine decarboxylase proenzyme                                                                | COG1586 | E  | Amino acid transport and metabolism                                                          | 973875  | 974669  | 644  | 1.43  | 8.83e-7  |
| plu0843     | CDS | speE  | spermidine synthase (putrescine aminopropyltransferase)                                                     | COG0421 | E  | Amino acid transport and metabolism                                                          | 974708  | 975577  | 948  | 2.02  | 8.62e-14 |
| plu0855     | CDS | -     | -                                                                                                           | COG0845 | MV | Cell wall/membrane/envelope biogenesis, Defense mechanisms                                   | 985470  | 985898  | 75   | -2.39 | 2.26e-6  |
| plu0856     | CDS | -     | conserved hypothetical protein                                                                              | COG2850 | J  | Translation, ribosomal structure and biogenesis                                              | 985888  | 987054  | 330  | -3.67 | 1.85e-24 |
| plu0857     | CDS | -     | -                                                                                                           | -       | -  | Unclassified                                                                                 | 987214  | 987588  | 1049 | -2.33 | 2.33e-17 |
| plu0858#    | CDS | -     | Conserved hypothetical protein; putative transmembrane protein                                              | -       | -  | Unclassified                                                                                 | 987602  | 988066  | 23   | -4.97 | 9.24e-9  |
| plu0884     | CDS | -     | conserved hypothetical protein                                                                              | COG3266 | D  | Cell cycle control, cell division, chromosome partitioning                                   | 1012869 | 1014542 | 2543 | 1.33  | 5.35e-8  |
| plu0885     | CDS | -     | putative pyocin S3 immunity protein                                                                         | -       | -  | Unclassified                                                                                 | 1014542 | 1014994 | 3375 | 1.20  | 1.07e-7  |
| plu0886     | CDS | -     | Putative pyocin S3 immunity protein                                                                         | -       | -  | Unclassified                                                                                 | 1015076 | 1015528 | 551  | 1.21  | 1.53e-5  |
| plu0887     | CDS | -     | C-terminal region of klebicin B, pyocin S2 and the killer protein of pyocin S1                              | COG4104 | U  | Intracellular trafficking, secretion, and vesicular transport                                | 1015625 | 1016074 | 430  | 1.34  | 6.28e-6  |
| plu0888     | CDS | -     | putative colicin / pyocin immunity protein                                                                  | -       | -  | Unclassified                                                                                 | 1016082 | 1016333 | 713  | 1.46  | 3.60e-8  |
| plu0902     | CDS | hemL  | glutamate-1-semialdehyde 2,1-aminomutase                                                                    | COG0001 | H  | Coenzyme transport and metabolism                                                            | 1036929 | 1038212 | 1225 | 1.45  | 1.07e-7  |
| plu0903     | CDS | -     | conserved hypothetical protein                                                                              | COG0657 | I  | Lipid transport and metabolism                                                               | 1038263 | 1039048 | 862  | 1.85  | 1.47e-10 |
| plu0932     | CDS | -     | hypothetical protein                                                                                        | COG1708 | R  | General function prediction only                                                             | 1073495 | 1074538 | 152  | 4.07  | 8.51e-22 |
| plu0933     | CDS | -     | Conserved hypothetical protein                                                                              | -       | -  | Unclassified                                                                                 | 1074544 | 1075578 | 60   | 4.50  | 5.89e-15 |
| plu0934     | CDS | -     | -                                                                                                           | COG0483 | G  | Carbohydrate transport and metabolism                                                        | 1075575 | 1076420 | 24   | 4.18  | 6.00e-8  |
| plu0935     | CDS | -     | Putative biotin synthase-related enzyme                                                                     | COG2516 | R  | General function prediction only                                                             | 1076423 | 1077556 | 48   | 3.10  | 2.60e-8  |
| plu0961     | CDS | tcdB1 | B component of insecticidal toxin complex, protein TcdB1                                                    | COG3209 | R  | General function prediction only                                                             | 1103029 | 1107459 | 212  | 1.80  | 6.76e-7  |
| plu0962     | CDS | tcdA1 | A component of insecticidal toxin complex, protein TcdA1                                                    | COG0497 | L  | Replication, recombination and repair                                                        | 1107512 | 1115089 | 423  | 2.00  | 3.31e-11 |
| plu0969     | CDS | tcdB2 | B component of insecticidal toxin complex, protein TcdB2                                                    | COG3209 | R  | General function prediction only                                                             | 1132074 | 1136501 | 105  | 2.70  | 7.36e-10 |
| plu0970     | CDS | tcdA2 | A component of insecticidal toxin complex, protein TcdA1                                                    | COG0497 | L  | Replication, recombination and repair                                                        | 1136558 | 1143892 | 264  | 3.48  | 1.30e-23 |
| plu0973     | CDS | -     | putative di-tripeptide transporter protein YhiP of Escherichia coli                                         | COG3104 | E  | Amino acid transport and metabolism                                                          | 1152675 | 1154144 | 310  | 1.97  | 1.72e-10 |
| plu0994     | CDS | phfA  | PhfA protein; adhesion protein; fimbriae                                                                    | COG3539 | N  | Cell motility                                                                                | 1177360 | 1178340 | 22   | -3.86 | 6.29e-8  |
| plu0995     | CDS | phd   | Fimbria; Membrane; Outer membrane; Transmembrane; Transport                                                 | COG3188 | NW | Cell motility, Extracellular structures                                                      | 1178368 | 1180881 | 155  | -4.10 | 3.35e-21 |
| plu0996     | CDS | phfC  | PhfC protein, putative adhesion protein, fimbriae                                                           | COG3121 | W  | Extracellular structures                                                                     | 1180887 | 1181555 | 105  | -4.54 | 1.64e-20 |
| plu0997     | CDS | phfS  | PhfC protein, putative adhesion protein, fimbriae                                                           | COG3539 | N  | Cell motility                                                                                | 1181612 | 1182121 | 609  | -4.37 | 1.66e-44 |
| plu1010     | CDS | -     | hypothetical protein                                                                                        | -       | -  | Unclassified                                                                                 | 1195389 | 1195637 | 81   | 1.58  | 8.97e-4  |
| plu1012     | CDS | -     | conserved hypothetical protein                                                                              | COG5441 | S  | Function unknown                                                                             | 1196502 | 1197746 | 694  | 1.16  | 2.47e-5  |
| plu1149     | CDS | -     | CdiA protein (TpsA-related family); presence of the VENN motif and DUF638 domain                            | COG3210 | U  | Intracellular trafficking, secretion, and vesicular transport                                | 1327789 | 1336602 | 7344 | 2.53  | 3.65e-28 |
| plu1150     | CDS | -     | CdiB protein (TpsB family)                                                                                  | COG2831 | U  | Intracellular trafficking, secretion, and vesicular transport                                | 1336651 | 1338315 | 2726 | 2.33  | 2.52e-23 |
| plu1191     | CDS | lysA  | diaminopimelate decarboxylase (DAP decarboxylase)                                                           | COG0019 | E  | Amino acid transport and metabolism                                                          | 1373105 | 1374415 | 1126 | -2.62 | 1.57e-24 |
| plu1192     | CDS | fadE  | -                                                                                                           | COG1960 | I  | Lipid transport and metabolism                                                               | 1374488 | 1376923 | 128  | 1.46  | 1.24e-3  |
| plu1234     | CDS | -     | putative exported protein                                                                                   | COG0584 | I  | Lipid transport and metabolism                                                               | 1426574 | 1427470 | 60   | 1.75  | 9.01e-4  |
| plu1241     | CDS | ggt   | xanthine-guanine phosphoribosyltransferase (XGPRT)                                                          | COG2236 | H  | Coenzyme transport and metabolism                                                            | 1435168 | 1435629 | 698  | -1.01 | 4.57e-3  |
| plu1242     | CDS | yafA  | -                                                                                                           | COG1073 | T  | Signal transduction mechanisms                                                               | 1435644 | 1436891 | 750  | -1.06 | 1.10e-3  |
| plu1266     | CDS | yfiA  | Highly similar to probable sigma-54 modulation protein YfiA of Escherichia coli                             | COG1544 | J  | Translation, ribosomal structure and biogenesis                                              | 1466407 | 1466769 | 92   | 1.95  | 3.37e-5  |
| plu1306     | CDS | glu   | Glutamate/aspartate transport system permease protein Glu                                                   | COG0765 | E  | Amino acid transport and metabolism                                                          | 1514978 | 1515718 | 114  | 1.67  | 4.05e-4  |
| plu1307     | CDS | glit  | Glutamate/aspartate transport system permease protein Glit                                                  | COG0834 | ET | Amino acid transport and metabolism, Signal transduction mechanisms                          | 1515851 | 1516744 | 579  | 2.04  | 1.03e-12 |
| pluCDS16291 | CDS | -     | -                                                                                                           | -       | -  | Unclassified                                                                                 | 1629184 | 1629867 | 697  | 2.26  | 5.21e-18 |
| plu1367     | CDS | -     | CdiA protein (TpsA-related family); presence of the VENN motif and DUF638 domain                            | COG3210 | U  | Intracellular trafficking, secretion, and vesicular transport                                | 1629806 | 1638091 | 3391 | 2.92  | 5.98e-35 |
| plu1368     | CDS | -     | CdiB protein (TpsB family)                                                                                  | COG2831 | U  | Intracellular trafficking, secretion, and vesicular transport                                | 1638740 | 1640404 | 495  | 3.01  | 2.76e-24 |
| plu1382     | CDS | prtS  | Extracellular M4 metalloprotease precursor PrtS                                                             | COG3227 | O  | Posttranslational modification, protein turnover, chaperones                                 | 1661809 | 1662906 | 1566 | -2.16 | 1.46e-17 |
| pluRNA1682  | RNA | -     | transfer RNA-Val                                                                                            | -       | -  | Unclassified                                                                                 | 1683915 | 1683990 | 156  | -1.49 | 1.11e-3  |
| pluRNA1684  | RNA | -     | transfer RNA-Lys                                                                                            | -       | -  | Unclassified                                                                                 | 1684372 | 1684447 | 474  | -1.05 | 3.44e-3  |
| plu1409     | CDS | -     | putative MFS transporter                                                                                    | COG2814 | G  | Carbohydrate transport and metabolism                                                        | 1691868 | 1693100 | 398  | -2.07 | 1.43e-10 |
| plu1410     | CDS | -     | conserved hypothetical protein                                                                              | COG1475 | D  | Cell cycle control, cell division, chromosome partitioning                                   | 1693066 | 1693461 | 164  | -2.20 | 4.14e-8  |
| plu1411     | CDS | -     | -                                                                                                           | COG0399 | M  | Cell wall/membrane/envelope biogenesis                                                       | 1693448 | 1694650 | 370  | -2.46 | 2.12e-14 |
| plu1412     | CDS | -     | putative hemolysin erythrocyte lysis protein 2                                                              | COG0079 | E  | Amino acid transport and metabolism                                                          | 1694887 | 1696743 | 260  | -2.65 | 1.15e-13 |
| plu1413     | CDS | -     | -                                                                                                           | COG0223 | J  | Translation, ribosomal structure and biogenesis                                              | 1696740 | 1697414 | 135  | -1.87 | 9.71e-6  |
| plu1414     | CDS | -     | putative hydrolase                                                                                          | COG0561 | HR | Coenzyme transport and metabolism, General function prediction only                          | 1697422 | 1698249 | 496  | -1.15 | 4.95e-4  |
| plu1415     | CDS | -     | Protein containing Membrane Attack Complex/Perforin (MACPF) domains                                         | -       | -  | Unclassified                                                                                 | 1698682 | 1700214 | 31   | -1.88 | 3.31e-3  |
| plu1419     | CDS | kdpB  | potassium-transporting ATPase B chain                                                                       | COG2216 | P  | Inorganic ion transport and metabolism                                                       | 1704464 | 1706530 | 40   | 1.82  | 6.40e-4  |
| plu1420     | CDS | kdpA  | potassium-transporting ATPase A chain                                                                       | COG2060 | P  | Inorganic ion transport and metabolism                                                       | 1706551 | 1708257 | 72   | 1.85  | 7.93e-5  |
| pluRNA175C  | RNA | -     | transfer RNA-Lys                                                                                            | -       | -  | Unclassified                                                                                 | 1749948 | 1750023 | 935  | -1.39 | 9.16e-7  |
| pluRNA175E  | RNA | -     | transfer RNA-Lys                                                                                            | -       | -  | Unclassified                                                                                 | 1750058 | 1750133 | 216  | -1.51 | 1.42e-4  |
| plu1504     | CDS | -     | Putative 2-amino-3-ketobutyrate coenzyme A ligase                                                           | COG0156 | H  | Coenzyme transport and metabolism                                                            | 1801468 | 1802814 | 375  | -2.12 | 3.54e-10 |
| plu1515     | CDS | -     | Similar to MccB protein of Escherichia coli, involved in the production of microcin C7                      | COG0476 | H  | Coenzyme transport and metabolism                                                            | 1814537 | 1815595 | 134  | 1.99  | 1.19e-6  |
| plu1516     | CDS | -     | Lipase                                                                                                      | COG3675 | I  | Lipid transport and metabolism                                                               | 1815904 | 1817010 | 290  | -1.41 | 5.46e-4  |
| plu1519     | CDS | -     | Lipase                                                                                                      | COG3675 | I  | Lipid transport and metabolism                                                               | 1820645 | 1821769 | 563  | -1.74 | 9.34e-8  |
| plu1534     | CDS | -     | DNA protection during starvation protein                                                                    | COG0783 | PV | Inorganic ion transport and metabolism, Defense mechanisms                                   | 1835229 | 1835576 | 40   | -2.47 | 8.47e-7  |
| plu1537     | CDS | pit   | Insecticidal crystal-related protein Pit                                                                    | -       | -  | Unclassified                                                                                 | 1838326 | 1838736 | 5919 | -2.04 | 9.27e-17 |
| plu1561     | CDS | -     | Putative calcium-dependent cell adhesion molecule-1 of Dictyostelium discoideum                             | -       | -  | Unclassified                                                                                 | 1866612 | 1867232 | 1030 | -2.28 | 9.76e-17 |
| plu1578     | CDS | -     | Similar to crystalline inclusion protein type II (Cjpa-like protein)                                        | -       | -  | Unclassified                                                                                 | 1882485 | 1882823 | 2740 | -4.58 | 2.00e-68 |
| plu1576     | CDS | cjpa  | Crystalline inclusion protein Cjpa                                                                          | -       | -  | Unclassified                                                                                 | 1883974 | 1884288 | 179  | -3.41 | 1.14e-15 |
| plu1579#    | CDS | -     | putative bacitracin transport permease YbjG of Escherichia coli                                             | COG0671 | I  | Lipid transport and metabolism                                                               | 1888106 | 1888714 | 741  | 1.82  | 2.45e-10 |
| plu1592     | CDS | csdP  | Cold shock-like protein CsdP                                                                                | COG1278 | K  | Transcription                                                                                | 1899373 | 1899594 | 192  | 1.79  | 3.02e-6  |
| plu1651     | CDS | -     | -                                                                                                           | -       | -  | Unclassified                                                                                 | 1969768 | 1970754 | 22   | -2.27 | 1.61e-3  |
| plu1654     | CDS | -     | conserved hypothetical protein                                                                              | COG1196 | D  | Cell cycle control, cell division, chromosome partitioning                                   | 1973894 | 1975858 | 7.03 | -2.78 | 3.59e-3  |

|            |      |       |                                                                                                                                                                |         |    |                                                                         |         |         |      |       |          |
|------------|------|-------|----------------------------------------------------------------------------------------------------------------------------------------------------------------|---------|----|-------------------------------------------------------------------------|---------|---------|------|-------|----------|
| plu1665    | CDS  | -     | conserved hypothetical protein                                                                                                                                 | COG3497 | X  | Mobilome: prophages, transposons                                        | 1988466 | 1989899 | 95   | -3.17 | 2.35e-11 |
| plu1666    | CDS  | -     | conserved hypothetical protein                                                                                                                                 | COG3497 | X  | Mobilome: prophages, transposons                                        | 1989911 | 1990993 | 72   | -2.97 | 2.61e-10 |
| plu1667    | CDS  | -     | conserved hypothetical protein                                                                                                                                 | COG0399 | M  | biogenesis                                                              | 1991047 | 1991496 | 39   | -3.82 | 5.34e-9  |
| plu1694    | CDS  | -     | conserved hypothetical protein                                                                                                                                 | COG3422 | S  | Unclassified                                                            | 2021795 | 2023357 | 11   | 2.79  | 1.69e-3  |
| plu1697    | CDS  | -     | conserved hypothetical protein                                                                                                                                 | COG3422 | S  | Function unknown                                                        | 2025763 | 2028669 | 28   | 2.00  | 2.12e-3  |
| plu1698    | CDS  | -     | conserved hypothetical protein                                                                                                                                 | COG3299 | X  | Mobilome: prophages, transposons                                        | 2028666 | 2031368 | 30   | 1.95  | 2.42e-3  |
| plu1706    | CDS  | -     | conserved hypothetical protein                                                                                                                                 | COG3497 | X  | Mobilome: prophages, transposons                                        | 2036552 | 2038036 | 265  | 3.50  | 2.37e-22 |
| plu1707    | CDS  | -     | conserved hypothetical protein                                                                                                                                 | COG3497 | X  | Mobilome: prophages, transposons                                        | 2038048 | 2039124 | 148  | 3.92  | 4.44e-20 |
| plu1708    | CDS  | -     | conserved hypothetical protein                                                                                                                                 | COG0399 | M  | biogenesis                                                              | 2039178 | 2039627 | 55   | 4.24  | 4.78e-14 |
| plu1780    | CDS  | mgsA  | methylglyoxal synthase                                                                                                                                         | COG1803 | G  | Carbohydrate transport and metabolism                                   | 2125558 | 2126016 | 53   | 1.82  | 1.66e-3  |
| plu1808    | CDS  | -     | hypothetical protein                                                                                                                                           | COG1803 | G  | Unclassified                                                            | 2156934 | 2157293 | 189  | 1.32  | 1.16e-3  |
| plu1813    | CDS  | -     | putative di-tripeptide ABC transporter                                                                                                                         | COG3104 | E  | Amino acid transport and metabolism                                     | 2159566 | 2161104 | 120  | 2.50  | 3.71e-9  |
| pluRNA2186 | tRNA | -     | transfer RNA-Asn                                                                                                                                               | COG3104 | E  | Unclassified                                                            | 2186131 | 2186206 | 51   | -2.67 | 3.65e-7  |
| plu1840    | CDS  | -     | Conserved hypothetical protein                                                                                                                                 | COG3104 | E  | Unclassified                                                            | 2187702 | 2188778 | 147  | -1.89 | 2.74e-5  |
| plu1864    | CDS  | -     | Truncated gene. Putative phosphoenolpyruvate phosphomutase                                                                                                     | COG0615 | M  | Cell wall/membrane/envelope biogenesis                                  | 2210011 | 2210184 | 98   | 3.96  | 3.15e-17 |
| plu1865    | CDS  | -     | Truncated gene. Putative phosphoenolpyruvate phosphomutase                                                                                                     | COG2513 | G  | Carbohydrate transport and metabolism                                   | 2210256 | 2210996 | 57   | 2.90  | 1.15e-8  |
| plu1866    | CDS  | -     | Similar to nitrilotriacetate monooxygenase component A                                                                                                         | COG2141 | HR | Coenzyme transport and metabolism, General function prediction only     | 2211178 | 2212509 | 73   | 3.57  | 9.74e-12 |
| plu1867    | CDS  | -     | Truncated gene, similar to N-terminal of homocitrate synthase                                                                                                  | COG0119 | E  | Amino acid transport and metabolism                                     | 2212546 | 2213232 | 61   | 2.92  | 1.01e-8  |
| plu1868    | CDS  | -     | Truncated gene, similar to C-terminal of homocitrate synthase                                                                                                  | COG0119 | E  | Amino acid transport and metabolism                                     | 2213239 | 2213682 | 38   | 2.84  | 1.00e-6  |
| plu1869    | CDS  | -     | Similar to large subunit of 3-isopropylmalate dehydratase, large subunit                                                                                       | COG0065 | E  | Amino acid transport and metabolism                                     | 2213679 | 2214920 | 151  | 1.92  | 7.66e-7  |
| plu1870    | CDS  | -     | Similar to 3-isopropylmalate dehydratase, small subunit (leuD-2)                                                                                               | COG0066 | E  | Amino acid transport and metabolism                                     | 2214913 | 2215470 | 43   | 1.62  | 3.58e-3  |
| plu1871    | CDS  | -     | Putative methyltransferases                                                                                                                                    | COG2226 | H  | Coenzyme transport and metabolism                                       | 2215467 | 2216252 | 53   | 1.80  | 8.09e-4  |
| plu1882    | CDS  | syfC  | Similar to non-ribosomal peptide synthetase (NRPS) proline dehydrogenase (Proline oxidase) / delta-1-pyrroline-5-carboxylate dehydrogenase (p5C dehydrogenase) | COG0506 | E  | Unclassified                                                            | 2240985 | 2242391 | 213  | 1.24  | 1.22e-3  |
| plu1957    | CDS  | putA  | proline dehydrogenase (Proline oxidase) / delta-1-pyrroline-5-carboxylate dehydrogenase (p5C dehydrogenase)                                                    | COG0506 | E  | Amino acid transport and metabolism                                     | 2322639 | 2326619 | 1675 | 1.33  | 1.26e-7  |
| plu1958    | CDS  | putP  | Sodium/proline symporter (Proline permease)                                                                                                                    | COG0591 | E  | Amino acid transport and metabolism                                     | 2327106 | 2328590 | 3142 | 1.03  | 3.69e-5  |
| plu1967    | CDS  | pagC  | PagC-like membrane protein (virulence-related membrane protein) of Escherichia coli O157:H7                                                                    | COG3637 | M  | Cell wall/membrane/envelope biogenesis                                  | 2339359 | 2339907 | 377  | -1.16 | 1.14e-3  |
| plu1968    | CDS  | dsdC  | D-serine dehydratase (deaminase) transcriptional activator DsdC                                                                                                | COG0583 | K  | Transcription                                                           | 2340217 | 2341155 | 146  | -1.16 | 4.05e-3  |
| plu1969    | CDS  | dsdX  | DsdX permease                                                                                                                                                  | COG2610 | GR | Carbohydrate transport and metabolism, General function prediction only | 2341397 | 2342734 | 3063 | -3.51 | 6.32e-53 |
| plu1970    | CDS  | dsdA  | D-serine dehydratase DsdA                                                                                                                                      | COG3048 | E  | Amino acid transport and metabolism                                     | 2343419 | 2344750 | 2905 | -2.35 | 1.22e-26 |
| plu1975    | CDS  | -     | putative xenobiotic reductase B and NAD(P)H-dependent 2-cyclohexen-1-one reductase homolog                                                                     | COG1902 | C  | Energy production and conversion                                        | 2348123 | 2349178 | 296  | 2.23  | 5.54e-11 |
| plu1979    | CDS  | sgcA  | Putative phosphotransferase enzyme II, A component SgcA                                                                                                        | COG1762 | GT | Carbohydrate transport and metabolism, Signal transduction mechanisms   | 2351773 | 2352216 | 284  | 1.04  | 1.22e-3  |
| plu1983    | CDS  | -     | putative transcriptional regulator                                                                                                                             | COG2197 | TK | Signal transduction mechanisms, Transcription                           | 2354123 | 2354818 | 31   | -2.39 | 1.37e-3  |
| plu1984    | CDS  | -     | -                                                                                                                                                              | COG2771 | K  | Transcription                                                           | 2354999 | 2355448 | 45   | -2.76 | 1.24e-6  |
| plu1985    | CDS  | -     | -                                                                                                                                                              | COG2771 | K  | Transcription                                                           | 2355488 | 2355625 | 21   | -3.12 | 2.33e-5  |
| plu1986    | CDS  | -     | hypothetical protein                                                                                                                                           | COG2771 | K  | Transcription                                                           | 2355775 | 2356209 | 156  | -2.65 | 1.09e-10 |
| plu1992    | CDS  | fruB  | PTS system, fructose-specific IIA/FPr component                                                                                                                | COG1925 | TG | Signal transduction mechanisms, Carbohydrate transport and metabolism   | 2362665 | 2363792 | 488  | 3.37  | 4.01e-28 |
| plu1993    | CDS  | fruA  | PTS system, fructose-specific IIBC component                                                                                                                   | COG1299 | G  | Carbohydrate transport and metabolism                                   | 2363862 | 2365532 | 303  | 2.50  | 1.00e-13 |
| plu1996    | CDS  | yhfX  | -                                                                                                                                                              | COG3457 | E  | Amino acid transport and metabolism                                     | 2367087 | 2368265 | 698  | 1.50  | 4.19e-8  |
| plu2008    | CDS  | -     | putative transcriptional regulator, LuxR family                                                                                                                | COG2197 | TK | Signal transduction mechanisms, Transcription                           | 2377769 | 2378449 | 39   | -2.44 | 1.53e-4  |
| plu2011    | CDS  | -     | -                                                                                                                                                              | COG2197 | TK | Signal transduction mechanisms, Transcription                           | 2380505 | 2381185 | 108  | -2.09 | 6.85e-5  |
| plu2012    | CDS  | -     | -                                                                                                                                                              | COG2197 | TK | Signal transduction mechanisms, Transcription                           | 2381346 | 2382026 | 147  | -2.06 | 9.02e-6  |
| plu2013    | CDS  | -     | -                                                                                                                                                              | COG2197 | TK | Signal transduction mechanisms, Transcription                           | 2382053 | 2382733 | 135  | -2.19 | 4.62e-6  |
| plu2014    | CDS  | -     | -                                                                                                                                                              | COG2197 | TK | Signal transduction mechanisms, Transcription                           | 2382718 | 2382864 | 77   | -2.55 | 7.66e-7  |
| plu2015    | CDS  | -     | -                                                                                                                                                              | COG2197 | TK | Signal transduction mechanisms, Transcription                           | 2382894 | 2383571 | 245  | -2.38 | 3.22e-9  |
| plu2016    | CDS  | -     | -                                                                                                                                                              | COG2197 | TK | Signal transduction mechanisms, Transcription                           | 2383627 | 2384319 | 520  | -2.25 | 2.35e-11 |
| plu2019    | CDS  | -     | putative transcriptional regulator, LuxR family                                                                                                                | COG2197 | TK | Signal transduction mechanisms, Transcription                           | 2387125 | 2387799 | 44   | -2.03 | 1.01e-3  |
| plu2023    | CDS  | -     | putative tail fiber protein of a prophage                                                                                                                      | COG4675 | S  | Function unknown                                                        | 2392707 | 2394188 | 161  | -1.50 | 7.72e-4  |
| pluRNA247C | tRNA | -     | transfer RNA-Ser                                                                                                                                               | COG4675 | S  | Unclassified                                                            | 2470432 | 2470521 | 514  | -1.27 | 1.01e-4  |
| plu2133    | CDS  | yeaY  | -                                                                                                                                                              | COG3065 | M  | Cell wall/membrane/envelope biogenesis                                  | 2516428 | 2517006 | 877  | 1.24  | 1.71e-5  |
| plu2143#   | CDS  | -     | hypothetical protein                                                                                                                                           | COG3065 | M  | Unclassified                                                            | 2525733 | 2526353 | 1418 | -1.94 | 1.74e-12 |
| plu2144    | CDS  | hslJ  | Heat shock protein HslJ                                                                                                                                        | COG3187 | O  | Posttranslational modification, protein turnover, chaperones            | 2526677 | 2527090 | 3227 | -1.83 | 2.46e-13 |
| plu2153    | CDS  | -     | conserved hypothetical protein                                                                                                                                 | COG1376 | M  | Cell wall/membrane/envelope biogenesis                                  | 2538015 | 2538377 | 84   | 3.37  | 9.33e-13 |
| plu2162    | CDS  | ydgI  | -                                                                                                                                                              | COG0531 | E  | Amino acid transport and metabolism                                     | 2546307 | 2547698 | 401  | -1.09 | 1.90e-3  |
| plu2191    | CDS  | -     | Similarity with diaminobutyric acid aminotransferase                                                                                                           | COG0160 | E  | Amino acid transport and metabolism                                     | 2576697 | 2580116 | 3267 | 3.51  | 2.40e-44 |
| plu2192    | CDS  | -     | Similar to molybdopterin and thiamine biosynthesis protein                                                                                                     | COG0476 | H  | Coenzyme transport and metabolism                                       | 2580119 | 2581237 | 799  | 3.12  | 3.48e-28 |
| plu2193    | CDS  | -     | Putative gamma-butyrobetaine,2-oxoglutarate                                                                                                                    | COG2175 | Q  | Secondary metabolites biosynthesis, transport and catabolism            | 2581248 | 2582255 | 753  | 3.09  | 2.51e-27 |
| plu2194    | CDS  | -     | Similar to acetyltransferase                                                                                                                                   | COG0456 | J  | Translation, ribosomal structure and biogenesis                         | 2582304 | 2582744 | 389  | 3.27  | 1.45e-23 |
| plu2195    | CDS  | -     | Hypothetical protein                                                                                                                                           | COG2843 | M  | Cell wall/membrane/envelope biogenesis                                  | 2582780 | 2583016 | 126  | 3.16  | 9.62e-13 |
| plu2196    | CDS  | -     | Similar to capsule biosynthesis protein                                                                                                                        | COG2843 | M  | Cell wall/membrane/envelope biogenesis                                  | 2582988 | 2583881 | 543  | 3.17  | 3.48e-25 |
| plu2197    | CDS  | -     | Similar to NtkS protein involved in the biosynthesis of the peptidyl nucleoside antibiotic nikkomycin                                                          | COG0026 | F  | Nucleotide transport and metabolism                                     | 2583890 | 2585077 | 631  | 3.06  | 1.90e-25 |
| plu2198    | CDS  | -     | Similar to the phosphoribosylamine-glycine ligase                                                                                                              | COG0151 | F  | Nucleotide transport and metabolism                                     | 2585118 | 2586380 | 558  | 3.02  | 2.31e-24 |
| plu2199    | CDS  | -     | Similar to permeases of the major facilitator superfamily                                                                                                      | COG2271 | G  | Carbohydrate transport and metabolism                                   | 2586407 | 2587792 | 464  | 2.79  | 2.14e-20 |
| plu2200    | CDS  | -     | Similar to glutamyl-tRNA(Gln) amidotransferase chain A                                                                                                         | COG0154 | J  | Translation, ribosomal structure and biogenesis                         | 2587792 | 2589135 | 399  | 2.41  | 9.35e-15 |
| plu2231    | CDS  | ynfD  | -                                                                                                                                                              | COG1508 | K  | Unclassified                                                            | 2624343 | 2624606 | 695  | 1.37  | 1.47e-6  |
| plu2232    | CDS  | ynfB  | -                                                                                                                                                              | COG1508 | K  | Transcription                                                           | 2624622 | 2624984 | 679  | 1.33  | 3.62e-6  |
| plu2238    | CDS  | attM  | NAHL lactonase; Zn-metallohydrolase family                                                                                                                     | COG0491 | R  | General function prediction only                                        | 2632964 | 2633734 | 59   | 1.57  | 1.38e-3  |
| plu2267    | CDS  | -     | conserved hypothetical protein                                                                                                                                 | COG5301 | X  | Unclassified                                                            | 2664517 | 2665476 | 50   | -1.99 | 9.56e-4  |
| plu2303    | CDS  | -     | putative tail fiber protein                                                                                                                                    | COG5301 | X  | Mobilome: prophages, transposons                                        | 2704727 | 2705602 | 20   | -2.88 | 2.87e-4  |
| plu2313    | CDS  | -     | Lipase                                                                                                                                                         | COG2931 | Q  | Secondary metabolites biosynthesis, transport and catabolism            | 2709005 | 2710858 | 173  | 1.29  | 1.91e-3  |
| plu2315    | CDS  | -     | Probable transcriptional regulator of the luminibactin locus                                                                                                   | COG2207 | K  | Transcription                                                           | 2712189 | 2713160 | 263  | -1.12 | 4.78e-3  |
| plu2316    | CDS  | -     | Luminibactin receptor                                                                                                                                          | COG4771 | P  | Inorganic ion transport and metabolism                                  | 2713457 | 2715463 | 855  | -1.10 | 3.28e-5  |
| plu2326    | CDS  | txp40 | Txp40, 40 kDa insecticidal protein (previously name A24tox)                                                                                                    | COG1960 | I  | Unclassified                                                            | 2744886 | 2745893 | 81   | 3.33  | 7.68e-12 |
| plu2336    | CDS  | -     | -                                                                                                                                                              | COG1960 | I  | Lipid transport and metabolism                                          | 2751654 | 2753417 | 30   | -2.10 | 1.58e-3  |
| plu2337    | CDS  | -     | hypothetical protein                                                                                                                                           | COG1038 | C  | Energy production and conversion                                        | 2753942 | 2754256 | 317  | -2.68 | 6.01e-15 |
| plu2347    | CDS  | goaG  | 4-aminobutyrate aminotransferase (gamma-amino-N-butyrate transaminase) (GABA transaminase)                                                                     | COG0160 | E  | Amino acid transport and metabolism                                     | 2764455 | 2765732 | 46   | 1.69  | 4.63e-3  |

|          |       |        |                                                                                                                     |         |    |                                                                               |         |         |      |       |          |
|----------|-------|--------|---------------------------------------------------------------------------------------------------------------------|---------|----|-------------------------------------------------------------------------------|---------|---------|------|-------|----------|
| plu2350  | CDS   | -      | Oligopeptide ABC transporter; periplasmic binding protein                                                           | COG4166 | E  | Amino acid transport and metabolism                                           | 2768877 | 2770487 | 18   | -2.68 | 2.95e-3  |
| plu2355  | CDS   | -      | hypothetical protein                                                                                                |         |    | Unclassified                                                                  | 2774021 | 2774488 | 58   | -2.53 | 2.06e-6  |
| plu2412  | CDS   | -      | conserved hypothetical protein                                                                                      | COG1216 | G  | Carbohydrate transport and metabolism                                         | 2832866 | 2833933 | 193  | 1.06  | 1.84e-3  |
| plu2420  | CDS   | -      | -                                                                                                                   |         |    | Unclassified                                                                  | 2839044 | 2843954 | 262  | 1.82  | 6.68e-8  |
| plu2453  | CDS   | -      | Putative TpsA-related protein                                                                                       | COG3210 | U  | Intracellular trafficking, secretion, and vesicular transport                 | 2880371 | 2885434 | 126  | -2.05 | 1.70e-6  |
| plu2480# | CDS   | ail1   | Ail protein precursor of Yersinia                                                                                   | COG3637 | M  | Cell wall/membrane/envelope biogenesis                                        | 2920701 | 2921228 | 3938 | 2.29  | 2.09e-21 |
| plu2481  | CDS   | ail2   | Similar to Ail protein precursor of Yersinia                                                                        | COG3637 | M  | Cell wall/membrane/envelope biogenesis                                        | 2921745 | 2922290 | 904  | -3.09 | 5.55e-26 |
| plu2507# | CDS   | ygbJ   | Highly similar to hypothetical oxidoreductase YgbJ of Escherichia coli                                              | COG2084 | I  | Lipid transport and metabolism                                                | 2951054 | 2951959 | 803  | 1.87  | 2.51e-9  |
| plu2508  | CDS   | ygbK   | Function unknown; regulated by FliDC and FliA; mutants are not defective in motility or chemotaxis (by similarity)  | COG3395 | S  | Function unknown                                                              | 2951959 | 2953236 | 607  | 2.05  | 3.54e-10 |
| plu2509  | CDS   | ygbL   | -                                                                                                                   | COG0235 | G  | Carbohydrate transport and metabolism                                         | 2953229 | 2953870 | 319  | 2.14  | 8.41e-9  |
| plu2510  | CDS   | ygbM   | -                                                                                                                   | COG3622 | G  | Carbohydrate transport and metabolism                                         | 2953889 | 2954668 | 439  | 2.01  | 4.73e-9  |
| plu2511  | CDS   | ygbI   | -                                                                                                                   | COG1349 | KG | Transcription, Carbohydrate transport and metabolism                          | 2954681 | 2955448 | 383  | 2.30  | 3.76e-11 |
| plu2512  | CDS   | -      | Putative nucleoside-diphosphate-sugar epimerase                                                                     | COG0451 | M  | Cell wall/membrane/envelope biogenesis                                        | 2955621 | 2956586 | 441  | 2.58  | 1.68e-14 |
| plu2513  | CDS   | -      | -                                                                                                                   | COG2610 | GR | Carbohydrate transport and metabolism, General function prediction only       | 2956589 | 2957974 | 549  | 2.27  | 7.53e-13 |
| plu2534  | CDS   | -      | conserved hypothetical protein; weak similarity with PirA of Photobacterium luminescens Hm                          | COG4633 | R  | General function prediction only                                              | 2982682 | 2983026 | 3943 | -2.63 | 1.38e-27 |
| plu2560  | CDS   | dadX   | Alanine racemase, catabolic                                                                                         | COG0787 | M  | Cell wall/membrane/envelope biogenesis                                        | 3004014 | 3005102 | 300  | 1.63  | 3.84e-7  |
| plu2561  | CDS   | dadA   | D-amino acid dehydrogenase small subunit                                                                            | COG0665 | E  | Amino acid transport and metabolism                                           | 3005109 | 3006422 | 278  | 1.80  | 2.05e-8  |
| plu2598  | CDS   | ydhH   | -                                                                                                                   | COG2377 | M  | Cell wall/membrane/envelope biogenesis                                        | 3041021 | 3042139 | 371  | 1.71  | 2.52e-7  |
| plu2599  | CDS   | slyB   | Outer membrane lipoprotein SlyB precursor                                                                           | COG3133 | M  | Cell wall/membrane/envelope biogenesis                                        | 3042481 | 3042951 | 4157 | 1.18  | 2.26e-6  |
| plu2600  | CDS   | slyA   | Transcriptional regulator protein SlyA                                                                              | COG1846 | K  | Transcription                                                                 | 3043036 | 3043467 | 406  | -1.20 | 4.55e-4  |
| plu2609  | CDS   | -      | -                                                                                                                   | COG2309 | E  | Amino acid transport and metabolism                                           | 3051950 | 3052927 | 167  | 1.19  | 1.10e-3  |
| plu2609# | CDS   | -      | hypothetical protein                                                                                                | COG0469 | G  | Carbohydrate transport and metabolism                                         | 3053012 | 3053125 | 300  | 1.17  | 6.83e-5  |
| plu2634  | CDS   | -      | putative hemin-binding protein                                                                                      | COG4558 | P  | Inorganic ion transport and metabolism                                        | 3084624 | 3085442 | 576  | -1.32 | 3.29e-5  |
| plu2637  | CDS   | -      | hypothetical protein                                                                                                |         |    | Unclassified                                                                  | 3087284 | 3087898 | 767  | -1.53 | 1.23e-7  |
| plu2653  | CDS   | nlpC   | Probable lipoprotein NlpC precursor                                                                                 | COG0791 | M  | Cell wall/membrane/envelope biogenesis                                        | 3107082 | 3107567 | 119  | 2.01  | 4.15e-6  |
| plu2654  | CDS   | pbgE3  | 4-amino-4-deoxy-L-arabinose-phosphoundecaprenol flippase, PbgE3                                                     | COG2076 | V  | Defense mechanisms                                                            | 3107673 | 3108053 | 196  | 2.33  | 2.79e-10 |
| plu2655# | CDS   | pbgE2  | 4-amino-4-deoxy-L-arabinose-phosphoundecaprenol flippase, PbgE2                                                     | COG2076 | V  | Defense mechanisms                                                            | 3108050 | 3108391 | 259  | 2.03  | 3.99e-9  |
| plu2656# | CDS   | pbgE1  | 4-amino-4-deoxy-L-arabinose transferase, PbgE1 protein                                                              | COG1807 | M  | Cell wall/membrane/envelope biogenesis                                        | 3108388 | 3110049 | 1447 | 2.29  | 1.06e-18 |
| plu2657# | CDS   | pbgP4  | Conserved hypothetical protein PbgP4                                                                                | COG0726 | GM | Carbohydrate transport and metabolism, Cell wall/membrane/envelope biogenesis | 3110057 | 3110950 | 2419 | 2.40  | 5.20e-22 |
| plu2658# | CDS   | pbgP3  | UDP-L-Ara4N formyltransferase ; UDP-GlcA C-4'-decarboxylase PbgP3                                                   | COG0223 | J  | Translation, ribosomal structure and biogenesis                               | 3110950 | 3112932 | 6214 | 2.44  | 1.95e-24 |
| plu2659# | CDS   | pbgP2  | undecaprenyl phosphate-L-Ara4FN transferase PbgP2                                                                   | COG0463 | M  | Cell wall/membrane/envelope biogenesis                                        | 3112933 | 3113910 | 1623 | 2.49  | 1.84e-22 |
| plu2660# | CDS   | pbgP1  | UDP-4-amino-4-deoxy-L-arabinose--oxoglutarate aminotransferase PbgP1                                                | COG0399 | M  | Cell wall/membrane/envelope biogenesis                                        | 3113911 | 3115056 | 2190 | 2.52  | 8.88e-24 |
| plu2689  | CDS   | ftnA   | nonheme ferritin 1                                                                                                  | COG1528 | P  | Inorganic ion transport and metabolism                                        | 3191952 | 3192455 | 2640 | 1.01  | 5.37e-6  |
| plu2691  | CDS   | pip    | proline iminopeptidase (PIP)                                                                                        | COG0596 | HR | Coenzyme transport and metabolism, General function prediction only           | 3193177 | 3194130 | 1359 | 1.89  | 1.29e-15 |
| plu2692  | CDS   | yebF   | -                                                                                                                   |         |    | Unclassified                                                                  | 3194204 | 3194578 | 433  | 1.68  | 1.86e-8  |
| plu2696  | CDS   | sdaA   | L-serine dehydratase 1 (SDH 1)                                                                                      | COG1760 | E  | Amino acid transport and metabolism                                           | 3197110 | 3198474 | 396  | -1.27 | 3.96e-5  |
| plu2704  | CDS   | -      | -                                                                                                                   | COG0846 | O  | Posttranslational modification, protein turnover, chaperones                  | 3204991 | 3208869 | 309  | 1.16  | 1.53e-3  |
| plu2779  | CDS   | yegP   | -                                                                                                                   | COG3422 | S  | Function unknown                                                              | 3297706 | 3298050 | 157  | 1.63  | 7.26e-5  |
| plu2784# | CDS   | pagP   | LipidA acyltransferase PagP                                                                                         |         |    | Unclassified                                                                  | 3305063 | 3305686 | 201  | 1.80  | 2.10e-6  |
| plu2807# | CDS   | phoP   | Two-component response regulator PhoP                                                                               | COG0745 | TK | Signal transduction mechanisms, Transcription                                 | 3332475 | 3333143 | 302  | 1.49  | 5.42e-5  |
| plu2808  | CDS   | phoQ   | Two-component sensor kinase PhoQ                                                                                    | COG0642 | T  | Signal transduction mechanisms                                                | 3333163 | 3334626 | 354  | 1.37  | 5.97e-5  |
| plu2821  | CDS   | ndh    | NADH dehydrogenase                                                                                                  | COG1252 | C  | Energy production and conversion                                              | 3351843 | 3353147 | 430  | -1.20 | 1.13e-5  |
| plu2842  | CDS   | -      | conserved hypothetical protein                                                                                      | COG0702 | R  | General function prediction only                                              | 3373241 | 3373873 | 304  | 1.37  | 2.11e-5  |
| plu2849  | CDS   | yeeF   | -                                                                                                                   | COG0531 | E  | Amino acid transport and metabolism                                           | 3380945 | 3382327 | 1457 | -1.11 | 1.11e-4  |
| plu2957  | CDS   | -      | Similar to bacteriophage protein                                                                                    | COG4675 | S  | Function unknown                                                              | 3460804 | 3461709 | 82   | -2.51 | 4.29e-7  |
| plu2958  | CDS   | -      | putative tail fiber assembly protein                                                                                | COG1881 | R  | General function prediction only                                              | 3462413 | 3462835 | 363  | -2.28 | 2.30e-11 |
| plu2959# | CDS   | -      | Some similarities with bacteriophage protein                                                                        | COG4675 | S  | Function unknown                                                              | 3462838 | 3463425 | 462  | -2.30 | 5.07e-13 |
| plu2960  | CDS   | -      | Similar to bacteriophage tail fiber protein                                                                         | COG4675 | S  | Function unknown                                                              | 3463959 | 3464723 | 104  | -3.36 | 4.42e-12 |
| plu2961  | CDS   | -      | putative bacteriophage tail fiber protein                                                                           | COG4675 | S  | Function unknown                                                              | 3465167 | 3466582 | 135  | -2.42 | 2.03e-8  |
| plu2962# | CDS   | -      | putative bacteriophage tail fiber protein                                                                           | COG4675 | S  | Function unknown                                                              | 3466665 | 3468149 | 207  | -3.26 | 3.39e-16 |
| plu2972  | CDS   | -      | conserved hypothetical protein                                                                                      |         |    | Unclassified                                                                  | 3478972 | 3479619 | 224  | -1.70 | 1.90e-5  |
| plu2977  | CDS   | -      | conserved hypothetical protein                                                                                      |         |    | Unclassified                                                                  | 3481924 | 3482754 | 48   | -2.87 | 2.64e-7  |
| plu2978  | CDS   | -      | putative Hcp protein                                                                                                | COG3157 | U  | Intracellular trafficking, secretion, and vesicular transport                 | 3482762 | 3483241 | 68   | -4.01 | 1.83e-13 |
| plu3001  | CDS   | -      | conserved hypothetical protein                                                                                      | COG3591 | E  | Amino acid transport and metabolism                                           | 3502295 | 3503821 | 331  | -1.96 | 1.10e-8  |
| plu3001# | trRNA | 353    | transfer RNA-Thr                                                                                                    |         |    | Unclassified                                                                  | 3538549 | 3538624 | 844  | -1.21 | 4.59e-4  |
| plu3044  | CDS   | ahpD   | AhpD, carboxymuconolactone decarboxylase involved in 2,5-dihydroxyphenylalanine, precursor of 2,5-dihydroxystilbene | COG2128 | P  | Inorganic ion transport and metabolism                                        | 3543179 | 3543721 | 477  | -1.14 | 7.00e-4  |
| plu3067  | CDS   | -      | conserved hypothetical protein                                                                                      | COG0654 | HC | Energy production and conversion                                              | 3575125 | 3575667 | 1508 | 2.22  | 1.90e-17 |
| plu3075  | CDS   | phaxA2 | PhaxA2, similar to binary toxin XaxA of Xenorhabdus nematophila                                                     |         |    | Unclassified                                                                  | 3585640 | 3586866 | 40   | -2.61 | 1.20e-5  |
| plu3090  | CDS   | lrhA   | Transcriptional regulator LrhA (HexA)                                                                               | COG0583 | K  | Transcription                                                                 | 3603871 | 3604800 | 1403 | -1.17 | 1.73e-6  |
| plu3095  | CDS   | ackA   | acetate kinase (acetokinase)                                                                                        | COG0282 | C  | Energy production and conversion                                              | 3611182 | 3612384 | 860  | -1.62 | 4.90e-12 |
| plu3096  | CDS   | pta    | Phosphate acetyltransferase (phosphotransacetylase)                                                                 | COG0280 | C  | Energy production and conversion                                              | 3612456 | 3614597 | 1549 | -1.21 | 7.94e-9  |
| plu3098  | CDS   | -      | conserved hypothetical protein                                                                                      |         |    | Unclassified                                                                  | 3616168 | 3616842 | 84   | -2.12 | 3.79e-5  |
| plu3102  | CDS   | -      | putative methyltransferase                                                                                          | COG2226 | H  | Coenzyme transport and metabolism                                             | 3621255 | 3622079 | 242  | 1.82  | 7.57e-8  |
| plu3103  | CDS   | -      | putative cysteine desulfurase (NifS protein homolog)                                                                | COG1104 | E  | Amino acid transport and metabolism                                           | 3622091 | 3623257 | 190  | 1.81  | 2.08e-6  |
| plu3104  | CDS   | -      | conserved hypothetical protein                                                                                      |         |    | Unclassified                                                                  | 3623257 | 3624141 | 265  | 2.46  | 8.03e-13 |
| plu3107  | CDS   | astB   | succinylarginine dihydrolase                                                                                        | COG3724 | E  | Amino acid transport and metabolism                                           | 3627587 | 3628930 | 43   | 1.87  | 7.58e-4  |
| plu3108  | CDS   | astD   | succinylglutamic semialdehyde dehydrogenase                                                                         | COG1012 | C  | Energy production and conversion                                              | 3628981 | 3630456 | 109  | 2.21  | 4.99e-7  |
| plu3109  | CDS   | astA   | arginine N-succinyltransferase (AOST) succinylornithine transaminase (succinylornithine aminotransferase)           | COG3138 | E  | Amino acid transport and metabolism                                           | 3630459 | 3631490 | 70   | 2.47  | 4.65e-7  |
| plu3110  | CDS   | argM   | (carbon starvation protein C)                                                                                       | COG4992 | E  | Amino acid transport and metabolism                                           | 3631512 | 3632720 | 102  | 2.75  | 1.29e-10 |
| plu3120  | CDS   | -      | Putative membrane protein                                                                                           | COG3209 | R  | General function prediction only                                              | 3639471 | 3643967 | 194  | 1.85  | 2.31e-6  |
| plu3121  | CDS   | -      | hypothetical protein                                                                                                |         |    | Unclassified                                                                  | 3643983 | 3644150 | 199  | 1.79  | 2.55e-6  |
| plu3146  | CDS   | lsrB   | ABC transporter Binding Protein (BP) LsrB                                                                           | COG1879 | G  | Carbohydrate transport and metabolism                                         | 3709664 | 3710683 | 149  | 1.25  | 4.12e-3  |
| plu3154  | CDS   | -      | Hemolysin-coregulated protein (Hcp protein)                                                                         | COG3157 | U  | Intracellular trafficking, secretion, and vesicular transport                 | 3714422 | 3714901 | 481  | 1.40  | 2.19e-7  |
| plu3159  | CDS   | pdl    | putative lipase of Photobacterium luminescens, strain W14                                                           | COG3675 | I  | Lipid transport and metabolism                                                | 3718571 | 3720448 | 135  | -1.69 | 1.89e-4  |
| plu3164  | CDS   | yfcG   | -                                                                                                                   | COG0625 | O  | Posttranslational modification, protein turnover, chaperones                  | 3724793 | 3725413 | 511  | 1.08  | 1.54e-3  |
| plu3181  | CDS   | tctC   | Probable tricarboxylate transport protein TctC                                                                      | COG3181 | C  | Energy production and conversion                                              | 3742383 | 3743363 | 54   | -1.55 | 3.67e-3  |

|             |     |       |                                                                                                                                                                                                                      |         |    |                                                                                                      |         |         |      |       |          |
|-------------|-----|-------|----------------------------------------------------------------------------------------------------------------------------------------------------------------------------------------------------------------------|---------|----|------------------------------------------------------------------------------------------------------|---------|---------|------|-------|----------|
| plu3201     | CDS | fadI  | Beta-ketoacyl-CoA thiolase, anaerobic beta-oxidation complex II; in FadR regulon (by similarity)                                                                                                                     | COG0183 | I  | Lipid transport and metabolism                                                                       | 3766624 | 3767934 | 152  | 1.41  | 1.16e-3  |
| plu3204     | CDS | -     | -                                                                                                                                                                                                                    | COG3103 | R  | General function prediction only                                                                     | 3771375 | 3771728 | 2541 | -1.38 | 1.28e-8  |
| plu3219     | CDS | -     | Similar to probable transcription regulator, LuxR family                                                                                                                                                             | COG2771 | K  | Transcription                                                                                        | 3807331 | 3808020 | 757  | -1.69 | 2.74e-8  |
| plu3220     | CDS | -     | Similar to probable transcription regulator, LuxR family                                                                                                                                                             | COG2197 | TK | Signal transduction mechanisms, Transcription                                                        | 3808060 | 3808746 | 871  | -1.71 | 1.58e-8  |
| plu3221     | CDS | -     | Similar to probable transcription regulator, LuxR family                                                                                                                                                             | COG2197 | TK | Signal transduction mechanisms, Transcription                                                        | 3809059 | 3809727 | 183  | -2.21 | 9.46e-8  |
| plu3287     | CDS | treC  | Trehalose-6-phosphate hydrolase (alpha, alpha-phosphotrehalase) PTS system, trehalose-specific IIBC component (EIIBC-TRE) (trehalose permease IIBC component) (phosphotransferase enzyme II, BC component) (EII-TRE) | COG3066 | G  | Carbohydrate transport and metabolism                                                                | 3901245 | 3902906 | 1241 | 1.88  | 1.30e-12 |
| plu3288#    | CDS | treB  | conserved hypothetical protein                                                                                                                                                                                       | COG1263 | G  | metabolism                                                                                           | 3903006 | 3904427 | 643  | 2.21  | 2.59e-14 |
| plu3330     | CDS | -     | conserved hypothetical protein                                                                                                                                                                                       | COG4675 | S  | Function unknown                                                                                     | 3959757 | 3960584 | 100  | -2.14 | 1.46e-5  |
| plu3507     | CDS | -     | Putative major fimbrial sub-unit protein                                                                                                                                                                             | COG3539 | N  | Cell motility                                                                                        | 4099071 | 4099475 | 280  | 6.26  | 9.09e-47 |
| plu3508     | CDS | -     | putative Fimbrial regulatory gene                                                                                                                                                                                    | -       | -  | Unclassified                                                                                         | 4100136 | 4100411 | 68   | 4.61  | 2.92e-17 |
| plu3509     | CDS | -     | conserved hypothetical protein                                                                                                                                                                                       | COG0456 | J  | Translation, ribosomal structure and biogenesis                                                      | 4100619 | 4101074 | 166  | 1.81  | 3.70e-6  |
| plu3539     | CDS | prpE  | Propionate-CoA ligase (Propionyl-CoA synthetase)                                                                                                                                                                     | COG0365 | I  | Lipid transport and metabolism                                                                       | 4168817 | 4170703 | 213  | 1.18  | 4.20e-4  |
| plu3540     | CDS | prpD  | 2-methylcitrate dehydratase                                                                                                                                                                                          | COG2079 | G  | Carbohydrate transport and metabolism                                                                | 4170776 | 4172227 | 254  | 1.43  | 3.21e-6  |
| plu3541     | CDS | prpC  | 2-methylcitrate synthase (Methylcitrate synthase) (Citrate synthase 2)                                                                                                                                               | COG0372 | C  | Energy production and conversion                                                                     | 4172282 | 4173448 | 209  | 1.62  | 5.93e-7  |
| plu3542     | CDS | prpB  | Probable methylsuccinate lyase (2-methylsuccinate lyase)                                                                                                                                                             | COG2513 | G  | Carbohydrate transport and metabolism                                                                | 4173509 | 4174399 | 200  | 1.93  | 2.57e-9  |
| plu3543     | CDS | prpR  | Propionate catabolism operon regulatory protein                                                                                                                                                                      | COG3829 | KT | Transcription, Signal transduction mechanisms                                                        | 4174732 | 4176399 | 373  | 1.46  | 1.71e-5  |
| plu3563     | CDS | -     | putative p-aminobenzoic acid synthase                                                                                                                                                                                | COG0147 | EH | Amino acid transport and metabolism, Coenzyme transport and metabolism                               | 4198009 | 4200084 | 495  | -1.37 | 1.75e-5  |
| plu3565     | CDS | -     | putative class II aminotransferase and 5-aminolevulinic acid synthase                                                                                                                                                | COG0156 | H  | Coenzyme transport and metabolism                                                                    | 4200468 | 4201742 | 188  | -1.69 | 2.08e-5  |
| plu3566     | CDS | -     | putative methylase and with protoporphyrinogen oxidase                                                                                                                                                               | COG2890 | J  | Translation, ribosomal structure and biogenesis                                                      | 4201767 | 4202618 | 129  | -2.37 | 3.15e-8  |
| plu3567     | CDS | -     | putative N-formimidoyl tetracycline A synthase                                                                                                                                                                       | COG0665 | E  | Amino acid transport and metabolism                                                                  | 4202615 | 4204048 | 211  | -3.19 | 1.20e-16 |
| plu3568     | CDS | -     | Tps8 protein                                                                                                                                                                                                         | COG2821 | U  | Intracellular trafficking, secretion, and vesicular transport                                        | 4208442 | 4210121 | 145  | 2.89  | 2.68e-12 |
| plu3593     | CDS | -     | conserved hypothetical protein                                                                                                                                                                                       | COG3210 | U  | Intracellular trafficking, secretion, and vesicular transport                                        | 4235193 | 4236086 | 25   | 3.34  | 7.30e-7  |
| plu3594     | CDS | -     | Putative TpsA-related protein                                                                                                                                                                                        | COG3210 | U  | Intracellular trafficking, secretion, and vesicular transport                                        | 4236073 | 4242480 | 4387 | 3.58  | 7.76e-50 |
| plu3595     | CDS | -     | -                                                                                                                                                                                                                    | COG2831 | U  | Intracellular trafficking, secretion, and vesicular transport                                        | 4242432 | 4242791 | 384  | 3.48  | 8.52e-26 |
| plu3596     | CDS | gcvP  | glycine dehydrogenase [decarboxylating] (glycine decarboxylase) (glycine cleavage system P-protein)                                                                                                                  | COG0403 | E  | Amino acid transport and metabolism                                                                  | 4243413 | 4246289 | 1528 | 1.76  | 7.96e-13 |
| plu3597     | CDS | gcvH  | glycine cleavage system H protein                                                                                                                                                                                    | COG0509 | E  | Amino acid transport and metabolism                                                                  | 4246377 | 4246769 | 828  | 1.12  | 6.57e-5  |
| plu3598     | CDS | gcvT  | aminomethyltransferase (glycine cleavage system T protein)                                                                                                                                                           | COG0404 | E  | Amino acid transport and metabolism                                                                  | 4246891 | 4247985 | 973  | 1.45  | 3.70e-8  |
| plu3611     | CDS | yggE  | -                                                                                                                                                                                                                    | COG2968 | S  | Function unknown                                                                                     | 4259005 | 4259727 | 5876 | -1.25 | 5.93e-7  |
| plu3622     | CDS | aceF  | dihydropolipoamide acetyltransferase component of pyruvate dehydrogenase complex (E2)                                                                                                                                | COG0508 | C  | Energy production and conversion                                                                     | 4271312 | 4272910 | 3617 | -1.53 | 2.85e-13 |
| plu3623     | CDS | aceE  | pyruvate dehydrogenase E1 component                                                                                                                                                                                  | COG2609 | C  | Energy production and conversion                                                                     | 4272925 | 4275588 | 6728 | -1.83 | 3.66e-18 |
| plu3624     | CDS | pdhR  | pyruvate dehydrogenase complex repressor                                                                                                                                                                             | COG2186 | K  | Transcription                                                                                        | 4275778 | 4276542 | 681  | -2.36 | 9.09e-20 |
| plu3625     | CDS | -     | hypothetical protein                                                                                                                                                                                                 | -       | -  | Unclassified                                                                                         | 4277274 | 4277642 | 324  | 1.20  | 4.39e-4  |
| plu3626     | CDS | -     | -                                                                                                                                                                                                                    | COG0472 | M  | Cell wall/membrane/envelope biogenesis                                                               | 4277690 | 4278037 | 134  | 1.53  | 3.16e-4  |
| plu3627     | CDS | -     | putative transcription regulator.                                                                                                                                                                                    | COG3655 | K  | Transcription                                                                                        | 4278307 | 4278528 | 295  | 1.14  | 3.42e-4  |
| plu3628     | CDS | -     | conserved hypothetical protein                                                                                                                                                                                       | COG1086 | MO | Cell wall/membrane/envelope biogenesis, Posttranslational modification, protein turnover, chaperones | 4278537 | 4279115 | 843  | 1.53  | 3.98e-8  |
| plu3630     | CDS | -     | Conserved hypothetical protein                                                                                                                                                                                       | COG3539 | N  | Cell motility                                                                                        | 4280090 | 4280476 | 144  | 5.03  | 1.21e-26 |
| pluCD542807 | CDS | -     | hypothetical protein                                                                                                                                                                                                 | -       | -  | Unclassified                                                                                         | 4280440 | 4280703 | 115  | 5.30  | 4.11e-25 |
| plu3631     | CDS | -     | putative fimbrial chaperone YcbR precursor of Escherichia coli                                                                                                                                                       | COG3121 | W  | Extracellular structures                                                                             | 4280806 | 4281522 | 98   | 4.73  | 9.09e-20 |
| plu3632     | CDS | -     | -                                                                                                                                                                                                                    | COG3539 | N  | Cell motility                                                                                        | 4281533 | 4281748 | 30   | 3.98  | 1.67e-9  |
| plu3633     | CDS | -     | -                                                                                                                                                                                                                    | COG3539 | N  | Cell motility                                                                                        | 4281700 | 4281996 | 28   | 4.22  | 1.17e-9  |
| plu3634     | CDS | -     | putative the N-terminal region of outer membrane usher protein precursor                                                                                                                                             | COG3188 | NW | Cell motility, Extracellular structures                                                              | 4282079 | 4283065 | 26   | 3.57  | 2.59e-7  |
| plu3635     | CDS | -     | conserved hypothetical protein                                                                                                                                                                                       | COG1473 | K  | Transcription                                                                                        | 4283163 | 4283507 | 742  | 3.30  | 7.20e-4  |
| plu3669     | CDS | -     | conserved hypothetical protein                                                                                                                                                                                       | COG0790 | T  | Signal transduction mechanisms                                                                       | 4320004 | 4320630 | 187  | -1.61 | 7.26e-5  |
| plu3672     | CDS | leuO  | activator protein in leuABCD operon                                                                                                                                                                                  | COG0583 | K  | Transcription                                                                                        | 4323714 | 4324658 | 265  | -1.43 | 5.98e-5  |
| plu3680     | CDS | speB  | agmatinase (agmatine ureohydrolase) (AUH)                                                                                                                                                                            | COG0010 | E  | Amino acid transport and metabolism                                                                  | 4334743 | 4335666 | 865  | -1.09 | 2.18e-4  |
| plu3681     | CDS | speA  | biosynthetic arginine decarboxylase (ADC)                                                                                                                                                                            | COG1166 | E  | Amino acid transport and metabolism                                                                  | 4335836 | 4337740 | 795  | -1.38 | 3.77e-6  |
| plu3682     | CDS | -     | hypothetical protein                                                                                                                                                                                                 | -       | -  | Unclassified                                                                                         | 4337867 | 4338079 | 438  | -1.20 | 4.40e-4  |
| plu3718     | CDS | -     | CdIA protein (TpsA-related family); presence of the VENN motif and DUF638 domain                                                                                                                                     | COG3210 | U  | Intracellular trafficking, secretion, and vesicular transport                                        | 4374057 | 4383140 | 1683 | 3.27  | 4.86e-39 |
| plu3719     | CDS | -     | CdIB protein (TpsB family)                                                                                                                                                                                           | COG2821 | U  | Intracellular trafficking, secretion, and vesicular transport                                        | 4383189 | 4384853 | 198  | 3.13  | 4.07e-17 |
| plu3725     | CDS | abgB  | aminobenzoyle-glutamate utilization protein B                                                                                                                                                                        | COG1473 | R  | General function prediction only                                                                     | 4391036 | 4392484 | 34   | 1.98  | 1.00e-3  |
| plu3727     | CDS | abgR  | Putative transcriptional regulator of abgA/BT operon                                                                                                                                                                 | COG0583 | K  | Transcription                                                                                        | 4394074 | 4394973 | 94   | 2.23  | 4.75e-7  |
| plu3739     | CDS | aldB  | Aldehyde dehydrogenase B (Lactaldehyde dehydrogenase)                                                                                                                                                                | COG1012 | C  | Energy production and conversion                                                                     | 4409211 | 4410695 | 1813 | -1.23 | 8.43e-5  |
| plu3740     | CDS | -     | putative sodium:alanine symporter and other amino acid transport proteins                                                                                                                                            | COG1115 | E  | Amino acid transport and metabolism                                                                  | 4410741 | 4412108 | 670  | 1.36  | 6.34e-7  |
| plu3767     | CDS | sctN  | Type III secretion component protein SctN                                                                                                                                                                            | COG1157 | NU | Cell motility, Intracellular trafficking, secretion, and vesicular transport                         | 4434397 | 4435719 | 79   | 2.57  | 5.22e-7  |
| plu3771     | CDS | sctR  | Type III secretion component protein SctR                                                                                                                                                                            | COG4790 | U  | Intracellular trafficking, secretion, and vesicular transport                                        | 4438248 | 4438901 | 769  | 3.86  | 4.81e-4  |
| plu3790     | CDS | cspl  | cold shock-like protein (CPS-I)                                                                                                                                                                                      | COG1278 | K  | Transcription                                                                                        | 4452723 | 4452938 | 6615 | -1.37 | 8.48e-9  |
| plu3908     | CDS | ggt   | gamma-glutamyltranspeptidase                                                                                                                                                                                         | COG0405 | E  | Amino acid transport and metabolism                                                                  | 4579987 | 4581747 | 895  | 1.22  | 8.07e-6  |
| plu3983     | CDS | -     | hypothetical protein                                                                                                                                                                                                 | -       | -  | Unclassified                                                                                         | 4670172 | 4670273 | 213  | -1.43 | 6.98e-4  |
| plu3991     | CDS | ssT   | Na+/serine (threonine) symporter                                                                                                                                                                                     | COG3633 | E  | Amino acid transport and metabolism                                                                  | 4678384 | 4679631 | 234  | 1.19  | 2.34e-3  |
| pluCD546866 | CDS | -     | -                                                                                                                                                                                                                    | -       | -  | Unclassified                                                                                         | 4686529 | 4686873 | 433  | -1.08 | 1.53e-4  |
| plu4011     | CDS | -     | -                                                                                                                                                                                                                    | -       | -  | Unclassified                                                                                         | 4702279 | 4702785 | 127  | -1.51 | 1.28e-3  |
| plu4084     | CDS | -     | putative transport protein and multidrug resistance protein like bicyclomycin resistance protein                                                                                                                     | COG2814 | G  | Carbohydrate transport and metabolism                                                                | 4770938 | 4772125 | 249  | 1.36  | 2.61e-4  |
| plu4089     | CDS | fis   | DNA-binding protein (Factor-for-inversion stimulation protein) (HIN recombinational enhancer binding protein)                                                                                                        | COG2901 | K  | Transcription                                                                                        | 4776705 | 4777001 | 4539 | -1.05 | 2.37e-5  |
| plu4168     | CDS | tccB1 | A component of insecticidal toxin complex (part 2), protein TccB1                                                                                                                                                    | COG1538 | M  | Cell wall/membrane/envelope biogenesis                                                               | 4869362 | 4874056 | 737  | 1.04  | 4.61e-4  |
| plu4169     | CDS | tccA1 | A component of insecticidal toxin complex (part 1), protein TccA1                                                                                                                                                    | COG3206 | M  | Cell wall/membrane/envelope biogenesis                                                               | 4874151 | 4877051 | 482  | 1.49  | 1.38e-6  |
| plu4172     | CDS | -     | putative pyocin S3 immunity protein and to Photobacterium luminescens proteins                                                                                                                                       | -       | -  | Unclassified                                                                                         | 4878614 | 4879081 | 305  | 1.00  | 4.20e-3  |
| plu4186     | CDS | antI  | Hydrolase/peptidase AntI involved in anthraquinone biosynthesis (type II polyketide synthase)                                                                                                                        | COG1073 | T  | Signal transduction mechanisms                                                                       | 4898888 | 4900042 | 547  | -3.48 | 5.71e-29 |
| plu4187     | CDS | antH  | Cyclase/aromatase AntH involved in anthraquinone biosynthesis (type II polyketide synthase)                                                                                                                          | COG2867 | J  | Translation, ribosomal structure and biogenesis                                                      | 4900062 | 4901504 | 339  | -2.67 | 8.14e-16 |
| plu4188     | CDS | antG  | CoA ligase AntG involved in anthraquinone biosynthesis (type II polyketide synthase)                                                                                                                                 | COG0318 | IQ | Lipid transport and metabolism, Secondary metabolites biosynthesis, Transport and catabolism         | 4901504 | 4903051 | 182  | -3.69 | 5.46e-19 |
| plu4189     | CDS | antF  | Acyl carrier protein AntF involved in anthraquinone biosynthesis (type II polyketide synthase)                                                                                                                       | COG0236 | IQ | Lipid transport and metabolism, Secondary metabolites biosynthesis, transport and catabolism         | 4903075 | 4903323 | 96   | -4.13 | 8.65e-17 |
| plu4190     | CDS | antE  | Ketosynthase KS-beta AntE involved in anthraquinone biosynthesis (type II polyketide synthase)                                                                                                                       | COG0304 | IQ | Lipid transport and metabolism, Secondary metabolites biosynthesis, transport and catabolism         | 4903358 | 4904473 | 263  | -2.32 | 4.88e-11 |



|                  |     |      |                                                                                                                                                                                         |         |     |                                                                                                                                   |         |         |         |       |          |
|------------------|-----|------|-----------------------------------------------------------------------------------------------------------------------------------------------------------------------------------------|---------|-----|-----------------------------------------------------------------------------------------------------------------------------------|---------|---------|---------|-------|----------|
| plu4191          | CDS | antD | Ketosynthase KS-alpha AntD involved in anthraquinone biosynthesis (type II polyketide synthase)                                                                                         | COG0304 | IQ  | Lipid transport and metabolism, Secondary metabolites biosynthesis, transport and catabolism                                      | 4904466 | 4905752 | 302     | -3.68 | 1.33e-25 |
| plu4192          | CDS | antC | Cyclase AntC involved in anthraquinone biosynthesis (type II polyketide synthase)                                                                                                       | COG1878 | E   | Amino acid transport and metabolism                                                                                               | 4906404 | 4907219 | 206     | -4.20 | 4.11e-25 |
| plu4193          | CDS | antB | Phosphogantethinyl transferase AntB involved in anthraquinone biosynthesis (type II polyketide synthase)                                                                                | COG2091 | H   | Coenzyme transport and metabolism                                                                                                 | 4907212 | 4907925 | 295     | -4.70 | 1.82e-34 |
| plu4194          | CDS | antA | Ketoreductase AntA involved in anthraquinone biosynthesis (type II polyketide synthase)                                                                                                 | COG1028 | IQR | Lipid transport and metabolism, Secondary metabolites biosynthesis, transport and catabolism, General function prediction only    | 4907928 | 4908704 | 460     | -3.80 | 2.75e-33 |
| plu4210#         | CDS | -    | Conserved hypothetical protein with SANT/Myb DNA-binding domain (IPR001005)                                                                                                             | COG0287 | E   | Amino acid transport and metabolism                                                                                               | 4923248 | 4925854 | 554     | 1.46  | 4.75e-7  |
| plu4211#         | CDS | -    | Putative Type VI secretion system effector, Hcp (IPR008514)                                                                                                                             | COG3157 | U   | Intracellular trafficking, secretion, and vesicular transport                                                                     | 4925955 | 4926446 | 1819    | 2.52  | 7.93e-26 |
| plu4212#         | CDS | -    | Hypothetical protein                                                                                                                                                                    |         |     | Unclassified                                                                                                                      | 4926419 | 4926589 | 248     | 2.14  | 3.54e-10 |
| plu4213          | CDS | -    | Hypothetical protein                                                                                                                                                                    |         |     | Unclassified                                                                                                                      | 4926590 | 4926778 | 50      | 2.46  | 2.41e-6  |
| plu4214#         | CDS | -    | Putative type VI secretion system IcmF, C-terminal (domains IPR010623 and IPR009612)                                                                                                    | COG3523 | U   | Intracellular trafficking, secretion, and vesicular transport                                                                     | 4927191 | 4930550 | 672     | 2.17  | 3.29e-14 |
| plu4215#         | CDS | -    | Conserved hypothetical protein. Putative membrane protein.                                                                                                                              | COG3000 | I   | Lipid transport and metabolism                                                                                                    | 4930543 | 4931718 | 275     | 1.86  | 1.31e-7  |
| plu4216#         | CDS | -    | Conserved hypothetical protein                                                                                                                                                          |         |     | Intracellular trafficking, secretion, and vesicular transport                                                                     | 4931721 | 4931996 | 135     | 1.54  | 1.87e-4  |
| plu4217#         | CDS | -    | Conserved hypothetical protein. Putative membrane protein                                                                                                                               | COG4104 | U   | Unclassified                                                                                                                      | 4932024 | 4932692 | 260     | 1.50  | 7.79e-6  |
| plu4220#         | CDS | -    | Conserved hypothetical protein with SANT/Myb DNA-binding domain (IPR001005)                                                                                                             | COG0287 | E   | Amino acid transport and metabolism                                                                                               | 4934952 | 4937552 | 1320    | 1.14  | 9.94e-5  |
| plu4221#         | CDS | -    | Conserved hypothetical protein                                                                                                                                                          |         |     | Unclassified                                                                                                                      | 4937552 | 4938592 | 427     | 1.36  | 1.15e-4  |
| plu4222#         | CDS | -    | Putative Type VI secretion system, RhsGE-associated Vgr protein (domain IPR006533)                                                                                                      | COG3501 | UXR | Intracellular trafficking, secretion, and vesicular transport, Mobilome: prophages, transposons, General function prediction only | 4938603 | 4940981 | 907     | 1.33  | 3.63e-5  |
| plu4223#         | CDS | -    | Putative type VI secretion ATPase, ClpV1 family                                                                                                                                         | COG0542 | O   | Posttranslational modification, protein turnover, chaperones                                                                      | 4940978 | 4943659 | 1722    | 1.11  | 4.55e-4  |
| plu4230          | CDS | -    | conserved hypothetical protein                                                                                                                                                          |         |     | Unclassified                                                                                                                      | 4952453 | 4953391 | 62      | -3.38 | 1.21e-10 |
| plu4238          | CDS | -    | conserved hypothetical protein                                                                                                                                                          |         |     | Unclassified                                                                                                                      | 4960560 | 4961522 | 77      | -4.28 | 9.27e-17 |
| plu4241          | CDS | -    | -                                                                                                                                                                                       |         |     | Unclassified                                                                                                                      | 4964137 | 4965018 | 45      | -2.19 | 1.83e-4  |
| plu4242          | CDS | ppxA | phosphotrioxin A                                                                                                                                                                        | COG1524 | R   | General function prediction only                                                                                                  | 4965343 | 4967037 | 35      | -2.06 | 1.33e-3  |
| pluRNA44975 tRNA | -   | -    | transfer RNA-Leu                                                                                                                                                                        |         |     | Unclassified                                                                                                                      | 4975533 | 4975739 | 223     | -1.22 | 2.94e-3  |
| plu4291#         | CDS | -    | conserved hypothetical protein                                                                                                                                                          | COG3577 | R   | General function prediction only                                                                                                  | 5018093 | 5019289 | 644     | 2.05  | 5.07e-12 |
| plu4336          | CDS | -    | -                                                                                                                                                                                       | COG3670 | Q   | Secondary metabolites biosynthesis, transport and catabolism                                                                      | 5064178 | 5065650 | 82      | -2.44 | 8.47e-7  |
| plu4382          | CDS | dltD | DltD protein for D-alanine esterification of lipoteichoic acid and wall teichoic acid                                                                                                   | COG3966 | M   | Cell wall/membrane/envelope biogenesis                                                                                            | 5116163 | 5117365 | 255     | -1.97 | 1.14e-7  |
| plu4383          | CDS | dltB | DltB protein for D-alanine esterification of lipoteichoic acid and wall teichoic acid                                                                                                   | COG1696 | M   | Cell wall/membrane/envelope biogenesis                                                                                            | 5117509 | 5118633 | 72      | -2.21 | 2.10e-5  |
| plu4384          | CDS | dltA | D-alanine-activating enzyme (DAE) [D-alanine-D-alanyl carrier protein ligase] (DCL)                                                                                                     | COG1020 | Q   | Secondary metabolites biosynthesis, transport and catabolism                                                                      | 5118630 | 5120093 | 90      | -1.68 | 1.13e-3  |
| plu4393          | CDS | -    | conserved hypothetical protein                                                                                                                                                          | COG0823 | U   | Intracellular trafficking, secretion, and vesicular transport                                                                     | 5131421 | 5131987 | 117     | -2.40 | 1.95e-8  |
| plu4402          | CDS | fadB | Fatty oxidation complex alpha subunit [includes: enoyl-CoA hydratase; delta(3)-cis-delta(2)-trans-enoyl-CoA isomerase; 3-hydroxyacyl-CoA dehydrogenase; 3-hydroxybutyryl-CoA epimerase] | COG1024 | I   | Lipid transport and metabolism                                                                                                    | 5149379 | 5151565 | 386     | 1.54  | 6.21e-7  |
| plu4403          | CDS | fadA | 3-ketoacyl-CoA thiolase (fatty oxidation complex beta subunit) (beta-ketothiolase) [acetyl-CoA acyltransferase]                                                                         | COG0183 | I   | Lipid transport and metabolism                                                                                                    | 5151577 | 5152743 | 256     | 1.37  | 1.24e-4  |
| plu4418          | CDS | -    | putative pyrrolidone-carboxylate peptidase (5-oxopropyl-peptidase) (Pyroglyutamyl-peptidase I) (PGP-I) (Pyrase)                                                                         | COG2039 | O   | Posttranslational modification, protein turnover, chaperones                                                                      | 5166814 | 5167470 | 104     | -1.71 | 3.63e-4  |
| plu4419          | CDS | -    | putative exported protein                                                                                                                                                               | COG3485 | Q   | Secondary metabolites biosynthesis, transport and catabolism                                                                      | 5167715 | 5168548 | 99      | -1.92 | 2.51e-4  |
| plu4424          | CDS | -    | putative MFS transporter                                                                                                                                                                | COG2814 | G   | Carbohydrate transport and metabolism                                                                                             | 5175988 | 5177184 | 198     | -2.44 | 5.27e-11 |
| plu4496          | CDS | -    | conserved hypothetical protein                                                                                                                                                          | COG2509 | R   | General function prediction only                                                                                                  | 5252293 | 5253813 | 179     | -3.01 | 3.92e-13 |
| pluCD552537      | CDS | -    | -                                                                                                                                                                                       | COG3335 | X   | Mobilome: prophages, transposons                                                                                                  | 5253759 | 5254148 | 136     | -3.11 | 2.35e-12 |
| plu4502          | CDS | -    | -                                                                                                                                                                                       | COG0023 | J   | Translation, ribosomal structure and biogenesis                                                                                   | 5259368 | 5259619 | 1.21e+4 | -1.10 | 3.25e-6  |
| plu4523          | CDS | deaD | inducible ATP-independent RNA helicase                                                                                                                                                  | COG0513 | L   | Replication, recombination and repair                                                                                             | 5281393 | 5283327 | 4394    | -1.15 | 6.34e-7  |
| plu4540          | CDS | obgE | DNA-binding GTPase involved in cell partitioning; multicopy suppressor of ftsI(rnm)                                                                                                     | COG0536 | DL  | chromosome partitioning, Replication, recombination and repair                                                                    | 5302270 | 5303445 | 1651    | -1.08 | 3.63e-5  |
| plu4556          | CDS | ytfl | Function unknown; p0E regulon; periplasmic protein; expressed protein (by similarity)                                                                                                   | COG1253 | R   | General function prediction only                                                                                                  | 5319488 | 5320819 | 253     | 1.32  | 1.50e-4  |
| plu4558#         | CDS | ecfI | Function unknown; p0E regulon; periplasmic protein; expressed protein (by similarity)                                                                                                   | COG3054 | R   | General function prediction only                                                                                                  | 5321428 | 5321982 | 1426    | -1.21 | 1.66e-5  |
| plu4570          | CDS | rpII | S0S ribosomal subunit protein L9                                                                                                                                                        | COG0359 | J   | Translation, ribosomal structure and biogenesis                                                                                   | 5336224 | 5336676 | 8280    | -1.02 | 1.33e-4  |
| pluRNA5355 tRNA  | -   | -    | transfer RNA-Gly                                                                                                                                                                        |         |     | Unclassified                                                                                                                      | 5359645 | 5359720 | 980     | -1.09 | 3.29e-4  |
| pluRNA5355 tRNA  | -   | -    | transfer RNA-Gly                                                                                                                                                                        |         |     | Unclassified                                                                                                                      | 5359917 | 5359992 | 378     | -1.18 | 5.46e-4  |
| plu4601          | CDS | -    | -                                                                                                                                                                                       | COG3501 | UXR | Intracellular trafficking, secretion, and vesicular transport, Mobilome: prophages, transposons, General function prediction only | 5368573 | 5370549 | 1438    | 1.35  | 2.16e-6  |
| plu4602          | CDS | -    | Conserved hypothetical protein                                                                                                                                                          | COG1716 | T   | Signal transduction mechanisms                                                                                                    | 5370546 | 5371037 | 620     | 1.43  | 4.68e-6  |
| plu4603          | CDS | -    | conserved hypothetical protein                                                                                                                                                          |         |     | Unclassified                                                                                                                      | 5371040 | 5371384 | 341     | 1.29  | 4.00e-4  |
| plu4604          | CDS | -    | conserved hypothetical protein                                                                                                                                                          |         |     | Unclassified                                                                                                                      | 5371386 | 5371994 | 338     | 1.40  | 6.45e-5  |
| plu4605          | CDS | -    | Conserved hypothetical protein                                                                                                                                                          |         |     | Unclassified                                                                                                                      | 5372018 | 5372740 | 428     | 1.44  | 5.86e-6  |
| plu4606          | CDS | -    | conserved hypothetical protein                                                                                                                                                          |         |     | Intracellular trafficking, secretion, and vesicular transport                                                                     | 5372743 | 5373006 | 110     | 1.38  | 2.86e-3  |
| plu4607          | CDS | -    | conserved hypothetical protein                                                                                                                                                          | COG4104 | U   | Unclassified                                                                                                                      | 5373170 | 5373802 | 270     | 1.46  | 7.69e-5  |
| plu4608          | CDS | -    | Conserved hypothetical protein                                                                                                                                                          |         |     | Unclassified                                                                                                                      | 5373851 | 5374585 | 395     | 1.52  | 8.62e-7  |
| plu4609          | CDS | -    | conserved hypothetical protein                                                                                                                                                          |         |     | Intracellular trafficking, secretion, and vesicular transport                                                                     | 5374588 | 5374851 | 145     | 1.54  | 5.76e-4  |
| plu4611          | CDS | -    | conserved hypothetical protein                                                                                                                                                          | COG4104 | U   | Unclassified                                                                                                                      | 5375668 | 5376402 | 71      | 1.63  | 1.10e-3  |
| plu4628          | CDS | -    | putative L-2,4-diaminobutyrate decarboxylase                                                                                                                                            | COG0076 | E   | Amino acid transport and metabolism                                                                                               | 5394901 | 5396445 | 104     | -1.46 | 2.17e-4  |
| plu4629          | CDS | -    | -                                                                                                                                                                                       | COG3486 | Q   | Secondary metabolites biosynthesis, transport and catabolism                                                                      | 5396476 | 5397777 | 66      | -1.49 | 2.28e-3  |
| plu4630          | CDS | -    | putative rhizobactin and aerobactin siderophores biosynthesis proteins RhsF and LucC                                                                                                    | COG1670 | JO  | Translation, ribosomal structure and biogenesis, Posttranslational modification, protein turnover, chaperones                     | 5397777 | 5400194 | 184     | -1.07 | 4.18e-3  |
| plu4668          | CDS | ilvC | ketol-acid reductoisomerase (acetohydroxy-acidisomeroeductase) (alpha-keto-beta-hydroxyacyl reductoisomerase)                                                                           | COG0059 | EH  | Amino acid transport and metabolism, Coenzyme transport and metabolism                                                            | 5443372 | 5444850 | 5347    | -2.14 | 6.40e-24 |
| plu4748#         | CDS | -    | -                                                                                                                                                                                       |         |     | Unclassified                                                                                                                      | 5528419 | 5529000 | 1453    | -1.93 | 7.79e-13 |
| plu4758          | CDS | rpmE | S0S ribosomal subunit protein L31                                                                                                                                                       | COG0254 | J   | Translation, ribosomal structure and biogenesis                                                                                   | 5539633 | 5539848 | 8211    | -1.02 | 3.71e-5  |
| plu4767          | CDS | glpF | glycerol uptake facilitator protein                                                                                                                                                     | COG0580 | G   | Carbohydrate transport and metabolism                                                                                             | 5548786 | 5549616 | 373     | 1.07  | 1.84e-3  |
| plu4774          | CDS | pfkA | 6-phosphofructokinase isozyme I (phosphofructokinase-1)                                                                                                                                 | COG0205 | G   | Carbohydrate transport and metabolism                                                                                             | 5555554 | 5556525 | 828     | 1.24  | 3.19e-5  |
| plu4777          | CDS | ynbA | -                                                                                                                                                                                       | COG0558 | I   | Lipid transport and metabolism                                                                                                    | 5558482 | 5559156 | 170     | 1.32  | 1.59e-3  |
| plu4793          | CDS | cxpP | periplasmic protein precursor                                                                                                                                                           | COG3678 | O   | Posttranslational modification, protein turnover, chaperones                                                                      | 5566624 | 5567118 | 246     | 2.25  | 1.60e-11 |
| plu4844          | CDS | ppy5 | ketosynthase responsible for production of pyrone, signaling molecule causing Phototribus cell clumping                                                                                 | COG0332 | I   | Lipid transport and metabolism                                                                                                    | 5617384 | 5618445 | 18      | -2.18 | 2.94e-3  |
| plu4873          | CDS | -    | conserved hypothetical protein                                                                                                                                                          |         |     | Unclassified                                                                                                                      | 5645829 | 5646260 | 576     | -1.19 | 3.39e-4  |
| plu4892          | CDS | -    | -                                                                                                                                                                                       | COG0500 | QR  | Secondary metabolites biosynthesis, transport and catabolism, General function prediction only                                    | 5665879 | 5666832 | 36      | -2.58 | 9.73e-5  |



**Supplementary Table 3B:** List of 208 genes underexpressed in *P. luminescens* TT01 between LB culture and LB+polyB culture (logarithmic phase, FDRs0.005, -1<sub>2</sub> log<sub>2</sub>FC)

# indicates the genes belonging to the PhoP regulon in LB broth.

# # indicates the genes belonging to the core PhoP regulon.

\* ratio LB+polyB/LB

Colors highlight some functional categories:  
 components of secretion system (33 genes)  
 insecticidal toxins (9 genes)  
 transporter (25 genes)  
 extracellular enzymes

| Label           | Type       | Name     | Product                                                                                                                       | COG_ID              | COG_classID | COGClassDescription                                                                          | Begin         | End           | normalized average read count | log2 fold change* | adjusted p-value (FDR) |
|-----------------|------------|----------|-------------------------------------------------------------------------------------------------------------------------------|---------------------|-------------|----------------------------------------------------------------------------------------------|---------------|---------------|-------------------------------|-------------------|------------------------|
| plu0008         | CDS        | ogrK     | Ogr protein; transcriptional activator for bacteriophage P2 late genes                                                        |                     |             | Unclassified                                                                                 | 10251         | 10472         | 45                            | -1.99             | 8.01e-4                |
| plu0010         | CDS        | pts25    | Phage tail protein                                                                                                            | COG3499             | X           | Mobilome: prophages, transposons                                                             | 11631         | 12095         | 71                            | -1.83             | 5.66e-4                |
| plu0011         | CDS        | pts24    | Phage tail protein                                                                                                            | COG5283             | X           | Mobilome: prophages, transposons                                                             | 12098         | 14536         | 382                           | -3.55             | 7.26e-26               |
| plu0012         | CDS        | pts23    | Phage tail protein                                                                                                            |                     |             | Unclassified                                                                                 | 14517         | 14636         | 75                            | -5.20             | 6.86e-19               |
| plu0013         | CDS        | pts22    | Phage tail protein                                                                                                            |                     |             | Unclassified                                                                                 | 14651         | 14968         | 404                           | -5.40             | 4.19e-49               |
| plu0014         | CDS        | pts21    | Major phage tail tube protein                                                                                                 | COG3498             | X           | Mobilome: prophages, transposons                                                             | 14995         | 15510         | 670                           | -5.12             | 1.47e-55               |
| plu0015         | CDS        | pts20    | Major phage tail sheath protein                                                                                               | COG3497             | X           | Mobilome: prophages, transposons                                                             | 15521         | 16693         | 1243                          | -5.87             | 1.78e-81               |
| plu0019         | CDS        | pts16    | Tail fiber assembly protein                                                                                                   | COG2110             | J           | Translation, ribosomal structure and biogenesis                                              | 18438         | 19034         | 127                           | -1.79             | 2.08e-5                |
| plu0020         | CDS        | pts15    | Alternative tail fiber protein of bacteriophage-related plasmid and bacteriophage                                             | COG4675             | S           | Function unknown                                                                             | 19034         | 19522         | 89                            | -1.68             | 1.19e-3                |
| plu0021         | CDS        | pts14    | Tail fiber protein of bacteriophage                                                                                           | COG5301             | X           | Mobilome: prophages, transposons                                                             | 19522         | 20649         | 145                           | -2.10             | 1.45e-6                |
| plu0022         | CDS        | pts13    | Phage tail protein                                                                                                            | COG4385             | X           | Mobilome: prophages, transposons                                                             | 20646         | 21260         | 82                            | -2.31             | 1.27e-6                |
| plu0023         | CDS        | pts12    | Phage baseplate assembly protein                                                                                              | COG3948             | X           | Mobilome: prophages, transposons                                                             | 21253         | 22251         | 132                           | -2.59             | 4.16e-10               |
| plu0024         | CDS        | pts11    | Phage baseplate assembly protein                                                                                              | COG3628             | X           | Mobilome: prophages, transposons                                                             | 22256         | 22597         | 54                            | -2.98             | 8.39e-9                |
| plu0025         | CDS        | pts10    | Phage-related baseplate assembly protein                                                                                      | COG4540             | X           | Mobilome: prophages, transposons                                                             | 22597         | 23439         | 98                            | -3.47             | 6.24e-14               |
| plu0026         | CDS        | pts9     | Phage tail protein                                                                                                            | COG5004             | X           | Mobilome: prophages, transposons                                                             | 23936         | 24139         | 35                            | -3.96             | 1.48e-10               |
| <b>plu0104#</b> | <b>CDS</b> | -        | <b>Conserved hypothetical secreted protein</b>                                                                                | <b>COG3193</b>      | <b>S</b>    | <b>Function unknown</b>                                                                      | <b>101566</b> | <b>102060</b> | <b>166</b>                    | <b>-6.83</b>      | <b>1.21e-36</b>        |
| plu0157         | CDS        | cipB     | Crystalline inclusion protein CipB                                                                                            |                     |             | Unclassified                                                                                 | 162599        | 162901        | 68                            | -2.21             | 4.00e-4                |
| plu0158         | CDS        | amt      | L-arginine:lysine amidinotransferase                                                                                          | COG1834             | E           | Amino acid transport and metabolism                                                          | 163665        | 164765        | 79                            | -2.80             | 1.50e-8                |
| plu0162         | CDS        | -        | conserved hypothetical protein                                                                                                | COG1680             | V           | Defense mechanisms                                                                           | 168154        | 169746        | 218                           | -1.69             | 3.41e-5                |
| plu0163         | CDS        | -        | conserved hypothetical protein                                                                                                | COG1680             | V           | Defense mechanisms                                                                           | 169909        | 170412        | 8.83                          | -3.15             | 1.99e-3                |
| plu0165         | CDS        | -        | conserved hypothetical protein                                                                                                | COG1680             | V           | Defense mechanisms                                                                           | 172935        | 174524        | 92                            | -2.11             | 2.21e-5                |
| plu0182         | CDS        | cpmA     | CpmA protein involved in carbapenem biosynthesis                                                                              | COG0367             | E           | Amino acid transport and metabolism                                                          | 192436        | 193941        | 1786                          | -1.30             | 8.04e-7                |
| plu0183         | CDS        | cpmB     | CpmB protein involved in carbapenem biosynthesis                                                                              | COG1024             | I           | Lipid transport and metabolism                                                               | 193944        | 194693        | 1082                          | -1.09             | 5.50e-5                |
| plu0184         | CDS        | cpmC     | CpmC protein involved in carbapenem biosynthesis                                                                              | COG2175             | Q           | Secondary metabolites biosynthesis, transport and catabolism                                 | 194707        | 195528        | 1562                          | -1.04             | 5.23e-5                |
| plu0221         | CDS        | -        | putative amino acid permease component of ABC transporter                                                                     | COG0765             | E           | Amino acid transport and metabolism                                                          | 227701        | 228444        | 551                           | -1.16             | 9.56e-4                |
| plu0250         | CDS        | -        | putative TRP-1 protein encoded by the toxA gene of Burkholderia glumae, methyltransferase involved in toxoflavin biosynthesis | COG4976             | R           | General function prediction only                                                             | 267752        | 268495        | 64                            | -2.10             | 1.32e-4                |
| plu0315         | CDS        | -        | conserved hypothetical protein                                                                                                |                     |             | Unclassified                                                                                 | 333297        | 333845        | 67                            | -1.64             | 2.38e-3                |
| plu0318         | CDS        | -        | Putative Aida protein                                                                                                         |                     |             | Unclassified                                                                                 | 341028        | 341618        | 145                           | -1.92             | 5.26e-3                |
| plu0368         | CDS        | -        | Putative Type VI secretion, VasB, ImpH, VC_A0111 (IPR010732 domain)                                                           | COG3520             | U           | Intracellular trafficking, secretion, and vesicular transport                                | 395492        | 396472        | 244                           | -1.42             | 4.12e-5                |
| plu0369         | CDS        | -        | Putative type VI secretion system, VCA0110 (domain IPR010272)                                                                 | COG3519             | U           | Intracellular trafficking, secretion, and vesicular transport                                | 396508        | 398355        | 679                           | -1.25             | 8.14e-6                |
| plu0370         | CDS        | -        | Conserved hypothetical protein with basic-leucine zipper domain (IPR004827)                                                   | COG3518             | U           | Intracellular trafficking, secretion, and vesicular transport                                | 398357        | 398797        | 248                           | -1.60             | 7.64e-6                |
| plu0371         | CDS        | -        | Putative type VI secretion protein, EvpB/VC_A0108, tail sheath (domain IPR010269)                                             | COG3517             | U           | Intracellular trafficking, secretion, and vesicular transport                                | 398804        | 400282        | 1379                          | -1.58             | 4.37e-10               |
| plu0372         | CDS        | -        | Putative Type VI secretion system, VipA, VC_A0107 or Hcp2 (domain IPR008312)                                                  | COG3516             | U           | Intracellular trafficking, secretion, and vesicular transport                                | 400306        | 400803        | 679                           | -1.88             | 1.85e-11               |
| plu0373         | CDS        | -        | Putative Type VI secretion system effector, Hcp (IPR008514)                                                                   | COG3157             | U           | Intracellular trafficking, secretion, and vesicular transport                                | 401704        | 402222        | 5526                          | -2.01             | 1.25e-17               |
| <b>plu0480#</b> | <b>CDS</b> | <b>-</b> | <b>Conserved hypothetical protein with Galactose-binding like domain (IPR008979 domain)</b>                                   | <b>COG2273</b>      | <b>G</b>    | <b>Carbohydrate transport and metabolism</b>                                                 | <b>520584</b> | <b>521060</b> | <b>1908</b>                   | <b>-3.34</b>      | <b>7.36e-39</b>        |
| plu0549         | CDS        | -        | CdiB protein (TpsB family)                                                                                                    | COG2831             | U           | Intracellular trafficking, secretion, and vesicular transport                                | 618550        | 620268        | 37                            | -2.43             | 1.48e-4                |
| plu0578         | CDS        | yaaH     | -                                                                                                                             | COG1584             | C           | Energy production and conversion                                                             | 654920        | 655489        | 260                           | -1.30             | 6.42e-5                |
| pluRNA0744 tRNA | -          | -        | transfer RNA-Met                                                                                                              |                     |             | Unclassified                                                                                 | 744628        | 744704        | 740                           | -1.50             | 1.54e-7                |
| plu0697         | CDS        | metN     | D-methionine transport ATP-binding protein MetN                                                                               | COG1135             | E           | Amino acid transport and metabolism                                                          | 799779        | 800810        | 345                           | -1.09             | 1.27e-3                |
| plu0734         | CDS        | -        | conserved hypothetical protein                                                                                                | COG1621             | G           | Carbohydrate transport and metabolism                                                        | 841205        | 842320        | 95                            | -3.40             | 6.40e-13               |
| plu0760         | CDS        | -        | putative acid-CoA ligase and gramicidin S synthase 2                                                                          | COG0318             | IQ          | Lipid transport and metabolism, Secondary metabolites biosynthesis, transport and catabolism | 878406        | 879983        | 99                            | -1.82             | 1.76e-5                |
| plu0761         | CDS        | -        | -                                                                                                                             | COG0534             | V           | Defense mechanisms                                                                           | 880009        | 881409        | 137                           | -1.69             | 1.79e-5                |
| plu0762         | CDS        | -        | -                                                                                                                             | COG1960             | I           | Lipid transport and metabolism                                                               | 881414        | 882493        | 239                           | -1.14             | 4.02e-4                |
| plu0763         | CDS        | -        | hypothetical protein                                                                                                          |                     |             | Unclassified                                                                                 | 882486        | 883160        | 177                           | -2.12             | 7.13e-9                |
| plu0764         | CDS        | -        | hypothetical protein                                                                                                          | COG0332             | I           | Lipid transport and metabolism                                                               | 883171        | 884049        | 353                           | -2.71             | 1.90e-17               |
| plu0765         | CDS        | -        | putative acyl carrier protein                                                                                                 | COG0236             | IQ          | Lipid transport and metabolism, Secondary metabolites biosynthesis, transport and catabolism | 884051        | 884314        | 249                           | -2.68             | 6.96e-14               |
| plu0786         | CDS        | -        | Conserved hypothetical protein. Probable transmembrane protein with 3 candidate membrane-spanning segments.                   | COG3539             | N           | Cell motility                                                                                | 905365        | 905925        | 639                           | -5.19             | 4.96e-57               |
| plu0787         | CDS        | -        | putative fimbrial chaperone                                                                                                   | COG3121             | W           | Extracellular structures                                                                     | 906027        | 906743        | 55                            | -2.60             | 3.13e-7                |
| plu0788         | CDS        | -        | conserved hypothetical protein                                                                                                | COG3539             | N           | Cell motility                                                                                | 906743        | 907315        | 31                            | -2.90             | 6.24e-6                |
| plu0789         | CDS        | -        | putative fimbrial chaperone                                                                                                   | COG3121             | W           | Extracellular structures                                                                     | 907349        | 908098        | 29                            | -2.31             | 2.51e-4                |
| plu0855         | CDS        | -        | -                                                                                                                             | COG0845             | MV          | Cell wall/membrane/envelope biogenesis, Defense mechanisms                                   | 985470        | 985898        | 75                            | -2.39             | 2.26e-6                |
| plu0856         | CDS        | -        | conserved hypothetical protein                                                                                                | COG2850             | J           | Translation, ribosomal structure and biogenesis                                              | 985888        | 987054        | 330                           | -3.67             | 1.85e-24               |
| plu0857         | CDS        | -        | -                                                                                                                             |                     |             | Unclassified                                                                                 | 987214        | 987588        | 1049                          | -2.33             | 2.33e-17               |
| <b>plu0858#</b> | <b>CDS</b> | <b>-</b> | <b>Conserved hypothetical protein; putative transmembrane protein</b>                                                         | <b>Unclassified</b> |             | <b>987602</b>                                                                                | <b>988066</b> | <b>23</b>     | <b>-4.97</b>                  | <b>9.24e-9</b>    |                        |
| plu0994         | CDS        | phfA     | PhfA protein; adhesion protein; fimbriae                                                                                      | COG3539             | N           | Cell motility                                                                                | 1177360       | 1178340       | 22                            | -3.86             | 6.29e-8                |

|            |      |      |                                                                                             |         |    |                                                                         |         |         |      |       |          |
|------------|------|------|---------------------------------------------------------------------------------------------|---------|----|-------------------------------------------------------------------------|---------|---------|------|-------|----------|
| plu0995    | CDS  | phfD | Fimbria; Membrane; Outer membrane; Transmembrane; Transport                                 | COG3188 | NW | Cell motility, Extracellular structures                                 | 1178368 | 1180881 | 155  | -4.10 | 3.35e-21 |
| plu0996    | CDS  | phfC | PhfC protein, putative adhesion protein, fimbriae                                           | COG3121 | W  | Extracellular structures                                                | 1180887 | 1181555 | 105  | -4.54 | 1.64e-20 |
| plu0997    | CDS  | phfS | PhfC protein, putative adhesion protein, fimbriae                                           | COG3539 | N  | Cell motility                                                           | 1181612 | 1182121 | 609  | -4.37 | 1.66e-44 |
| plu1191    | CDS  | lysA | diaminopimelate decarboxylase (DAP decarboxylase)                                           | COG0019 | E  | Amino acid transport and metabolism                                     | 1373105 | 1374415 | 1126 | -2.62 | 1.57e-24 |
| plu1241    | CDS  | gpt  | xanthine-guanine phosphoribosyltransferase (XGPRT)                                          | COG2236 | H  | Coenzyme transport and metabolism                                       | 1435168 | 1435629 | 698  | -1.01 | 4.57e-3  |
| plu1242    | CDS  | yafA | -                                                                                           | COG1073 | T  | Signal transduction mechanisms                                          | 1435644 | 1436891 | 750  | -1.06 | 1.10e-3  |
| plu1382    | CDS  | prtS | Extracellular M4 metalloprotease precursor PrtS                                             | COG3227 | O  | Posttranslational modification, protein turnover, chaperones            | 1661809 | 1662906 | 1566 | -2.16 | 1.46e-17 |
| pluRNA1683 | tRNA | -    | transfer RNA-Val                                                                            | -       | -  | Unclassified                                                            | 1683915 | 1683990 | 156  | -1.49 | 1.11e-3  |
| pluRNA1684 | tRNA | -    | transfer RNA-Lys                                                                            | -       | -  | Unclassified                                                            | 1684372 | 1684447 | 474  | -1.05 | 3.44e-3  |
| plu1409    | CDS  | -    | putative MFS transporter                                                                    | COG2814 | G  | Carbohydrate transport and metabolism                                   | 1691868 | 1693100 | 398  | -2.07 | 1.43e-10 |
| plu1410    | CDS  | -    | conserved hypothetical protein                                                              | COG1475 | D  | Cell cycle control, cell division, chromosome partitioning              | 1693066 | 1693461 | 164  | -2.20 | 4.14e-8  |
| plu1411    | CDS  | -    | -                                                                                           | COG0399 | M  | Cell wall/membrane/envelope biogenesis                                  | 1693448 | 1694650 | 370  | -2.46 | 2.12e-14 |
| plu1412    | CDS  | -    | putative hemolysin erythrocyte lysis protein 2                                              | COG0079 | E  | Amino acid transport and metabolism                                     | 1694887 | 1696743 | 260  | -2.65 | 1.15e-13 |
| plu1413    | CDS  | -    | -                                                                                           | COG0223 | J  | Translation, ribosomal structure and biogenesis                         | 1696740 | 1697414 | 135  | -1.87 | 9.71e-6  |
| plu1414    | CDS  | -    | putative hydrolase                                                                          | COG0561 | HR | Coenzyme transport and metabolism, General function prediction only     | 1697422 | 1698249 | 496  | -1.15 | 4.95e-4  |
| plu1415    | CDS  | -    | Protein containing Membrane Attack Complex/Perforin (MACPF) domains                         | -       | -  | Unclassified                                                            | 1698682 | 1700214 | 31   | -1.88 | 3.31e-3  |
| pluRNA1750 | tRNA | -    | transfer RNA-Lys                                                                            | -       | -  | Unclassified                                                            | 1749948 | 1750023 | 935  | -1.39 | 9.16e-7  |
| pluRNA1750 | tRNA | -    | transfer RNA-Lys                                                                            | -       | -  | Unclassified                                                            | 1750058 | 1750133 | 216  | -1.51 | 1.42e-4  |
| plu1504    | CDS  | -    | Putative 2-amino-3-ketobutyrate coenzyme A ligase                                           | COG0156 | H  | Coenzyme transport and metabolism                                       | 1801468 | 1802814 | 375  | -2.12 | 3.54e-10 |
| plu1516    | CDS  | -    | Lipase                                                                                      | COG3675 | I  | Lipid transport and metabolism                                          | 1815904 | 1817010 | 290  | -1.41 | 5.46e-4  |
| plu1519    | CDS  | -    | Lipase                                                                                      | COG3675 | I  | Lipid transport and metabolism                                          | 1820645 | 1821769 | 563  | -1.74 | 9.34e-8  |
| plu1534    | CDS  | -    | DNA protection during starvation protein                                                    | COG0783 | PV | Inorganic ion transport and metabolism, Defense mechanisms              | 1835229 | 1835576 | 40   | -2.47 | 8.47e-7  |
| plu1537    | CDS  | pit  | Insecticidal crystal-related protein Pit                                                    | -       | -  | Unclassified                                                            | 1838326 | 1838736 | 5919 | -2.04 | 9.27e-17 |
| plu1561    | CDS  | -    | Putative calcium-dependent cell adhesion molecule-1 of Dictyostelium discoideum             | -       | -  | Unclassified                                                            | 1866612 | 1867232 | 1030 | -2.28 | 9.76e-17 |
| plu1575#   | CDS  | -    | Similar to crystalline inclusion protein type II (CipA-like protein)                        | -       | -  | Unclassified                                                            | 1882485 | 1882823 | 2740 | -4.58 | 2.00e-68 |
| plu1576    | CDS  | cipA | Crystalline inclusion protein CipA                                                          | -       | -  | Unclassified                                                            | 1883974 | 1884288 | 179  | -3.41 | 1.14e-15 |
| plu1651    | CDS  | -    | -                                                                                           | -       | -  | Unclassified                                                            | 1969768 | 1970754 | 22   | -2.27 | 1.61e-3  |
| plu1654    | CDS  | -    | conserved hypothetical protein                                                              | COG1196 | D  | Cell cycle control, cell division, chromosome partitioning              | 1973894 | 1975858 | 7.03 | -2.78 | 3.59e-3  |
| plu1665    | CDS  | -    | conserved hypothetical protein                                                              | COG3497 | X  | Mobilome: prophages, transposons                                        | 1988466 | 1989899 | 95   | -3.17 | 2.35e-11 |
| plu1666    | CDS  | -    | conserved hypothetical protein                                                              | COG3497 | X  | Mobilome: prophages, transposons                                        | 1989911 | 1990993 | 72   | -2.97 | 2.61e-10 |
| plu1667    | CDS  | -    | conserved hypothetical protein                                                              | COG0399 | M  | Cell wall/membrane/envelope biogenesis                                  | 1991047 | 1991496 | 39   | -3.82 | 5.34e-9  |
| pluRNA2186 | tRNA | -    | transfer RNA-Asn                                                                            | -       | -  | Unclassified                                                            | 2186131 | 2186206 | 51   | -1.67 | 3.65e-7  |
| plu1840    | CDS  | -    | Conserved hypothetical protein                                                              | -       | -  | Unclassified                                                            | 2187702 | 2188778 | 147  | -2.89 | 2.74e-5  |
| plu1967    | CDS  | pagC | PagC-like membrane protein (virulence-related membrane protein) of Escherichia coli O157:H7 | COG3637 | M  | Cell wall/membrane/envelope biogenesis                                  | 2339359 | 2339907 | 377  | -1.16 | 1.14e-3  |
| plu1968    | CDS  | dsdC | D-serine dehydratase (deaminase) transcriptional activator DsdC                             | COG0583 | K  | Transcription                                                           | 2340217 | 2341155 | 146  | -1.16 | 4.05e-3  |
| plu1969    | CDS  | dsdX | DsdX permease                                                                               | COG2610 | GR | Carbohydrate transport and metabolism, General function prediction only | 2341397 | 2342734 | 3063 | -3.51 | 6.32e-53 |
| plu1970    | CDS  | dsdA | D-serine dehydratase DsdA                                                                   | COG3048 | E  | Amino acid transport and metabolism                                     | 2343419 | 2344750 | 2905 | -2.35 | 1.22e-26 |
| plu1983    | CDS  | -    | putative transcriptional regulator                                                          | COG2197 | TK | Signal transduction mechanisms, Transcription                           | 2354123 | 2354818 | 31   | -2.39 | 1.37e-3  |
| plu1984    | CDS  | -    | -                                                                                           | COG2771 | K  | Transcription                                                           | 2354999 | 2355448 | 45   | -2.76 | 1.24e-6  |
| plu1985    | CDS  | -    | -                                                                                           | COG2771 | K  | Transcription                                                           | 2355488 | 2355625 | 21   | -3.12 | 2.33e-5  |
| plu1986    | CDS  | -    | hypothetical protein                                                                        | COG2771 | K  | Transcription                                                           | 2355775 | 2356209 | 156  | -2.65 | 1.09e-10 |
| plu2008    | CDS  | -    | putative transcriptional regulator, LuxR family                                             | COG2197 | TK | Signal transduction mechanisms, Transcription                           | 2377769 | 2378449 | 39   | -2.44 | 1.53e-4  |
| plu2011    | CDS  | -    | -                                                                                           | COG2197 | TK | Signal transduction mechanisms, Transcription                           | 2380505 | 2381185 | 108  | -2.09 | 6.85e-5  |
| plu2012    | CDS  | -    | -                                                                                           | COG2197 | TK | Signal transduction mechanisms, Transcription                           | 2381346 | 2382026 | 147  | -2.06 | 9.02e-6  |
| plu2013    | CDS  | -    | -                                                                                           | COG2197 | TK | Signal transduction mechanisms, Transcription                           | 2382053 | 2382733 | 135  | -2.19 | 4.62e-6  |
| plu2014    | CDS  | -    | -                                                                                           | COG2197 | TK | Signal transduction mechanisms, Transcription                           | 2382718 | 2382864 | 77   | -2.55 | 7.66e-7  |
| plu2015    | CDS  | -    | -                                                                                           | COG2197 | TK | Signal transduction mechanisms, Transcription                           | 2382894 | 2383571 | 245  | -2.38 | 3.22e-9  |
| plu2016    | CDS  | -    | -                                                                                           | COG2197 | TK | Signal transduction mechanisms, Transcription                           | 2383627 | 2384319 | 520  | -2.25 | 2.35e-11 |
| plu2019    | CDS  | -    | putative transcriptional regulator, LuxR family                                             | COG2197 | TK | Signal transduction mechanisms, Transcription                           | 2387125 | 2387799 | 44   | -2.03 | 1.01e-3  |
| plu2023    | CDS  | -    | putative tail fiber protein of a prophage                                                   | COG4675 | S  | Function unknown                                                        | 2392707 | 2394188 | 161  | -1.50 | 7.72e-4  |
| pluRNA2470 | tRNA | -    | transfer RNA-Ser                                                                            | -       | -  | Unclassified                                                            | 2470432 | 2470521 | 514  | -1.27 | 1.01e-4  |
| plu2143#   | CDS  | -    | hypothetical protein                                                                        | -       | -  | Unclassified                                                            | 2525733 | 2526353 | 1418 | -1.94 | 1.74e-12 |
| plu2144    | CDS  | hslJ | Heat shock protein HslJ                                                                     | COG3187 | O  | Posttranslational modification, protein turnover, chaperones            | 2526677 | 2527090 | 3227 | -1.83 | 2.46e-13 |
| plu2162    | CDS  | ydgl | -                                                                                           | COG0531 | E  | Amino acid transport and metabolism                                     | 2546307 | 2547698 | 401  | -1.09 | 1.90e-3  |
| plu2267    | CDS  | -    | conserved hypothetical protein                                                              | -       | -  | Unclassified                                                            | 2664517 | 2665476 | 50   | -1.99 | 9.56e-4  |
| plu2303    | CDS  | -    | putative tail fiber protein                                                                 | COG5301 | X  | Mobilome: prophages, transposons                                        | 2704727 | 2705602 | 20   | -2.88 | 2.87e-4  |
| plu2315    | CDS  | -    | Probable transcriptional regulator of the luminibactin locus                                | COG2207 | K  | Transcription                                                           | 2712189 | 2713160 | 263  | -1.12 | 4.78e-3  |
| plu2316    | CDS  | -    | Luminibactin receptor                                                                       | COG4771 | P  | Inorganic ion transport and metabolism                                  | 2713457 | 2715463 | 855  | -1.10 | 3.28e-5  |
| plu2336    | CDS  | -    | -                                                                                           | COG1960 | I  | Lipid transport and metabolism                                          | 2751654 | 2753417 | 30   | -2.10 | 1.58e-3  |
| plu2337    | CDS  | -    | hypothetical protein                                                                        | COG1038 | C  | Energy production and conversion                                        | 2753942 | 2754256 | 317  | -2.68 | 6.01e-15 |
| plu2350    | CDS  | -    | Oligopeptide ABC transporter; periplasmic binding protein                                   | COG4166 | E  | Amino acid transport and metabolism                                     | 2768877 | 2770487 | 18   | -2.68 | 2.95e-3  |
| plu2355    | CDS  | -    | hypothetical protein                                                                        | -       | -  | Unclassified                                                            | 2774021 | 2774488 | 58   | -2.53 | 2.06e-6  |
| plu2481    | CDS  | ail2 | Similar to Ail protein precursor of Yersinia                                                | COG3637 | M  | Cell wall/membrane/envelope biogenesis                                  | 2921745 | 2922290 | 904  | -3.09 | 5.55e-26 |
| plu2534    | CDS  | -    | conserved hypothetical protein; weak similarity with PirA of Photorhabdus luminescens Hm    | COG4633 | R  | General function prediction only                                        | 2982682 | 2983026 | 3943 | -2.63 | 1.38e-27 |
| plu2600    | CDS  | slyA | Transcriptional regulator protein SlyA                                                      | COG1846 | K  | Transcription                                                           | 3043036 | 3043467 | 406  | -1.20 | 4.55e-4  |
| plu2634    | CDS  | -    | putative hemin-binding protein                                                              | COG4558 | P  | Inorganic ion transport and metabolism                                  | 3084624 | 3085442 | 576  | -1.32 | 3.29e-5  |

|                 |     |        |                                                                                                                   |                |              |                                                                                                                                |                |                |            |              |                 |
|-----------------|-----|--------|-------------------------------------------------------------------------------------------------------------------|----------------|--------------|--------------------------------------------------------------------------------------------------------------------------------|----------------|----------------|------------|--------------|-----------------|
| plu2637         | CDS | -      | hypothetical protein                                                                                              |                | Unclassified | 3087284                                                                                                                        | 3087898        | 767            | -1.53      | 1.23e-7      |                 |
| plu2696         | CDS | sdaA   | L-serine dehydratase I (SDH I)                                                                                    | COG1760        | E            | Amino acid transport and metabolism                                                                                            | 3197110        | 3198474        | 396        | -1.27        | 3.96e-5         |
| plu2821         | CDS | ndh    | NADH dehydrogenase                                                                                                | COG1252        | C            | Energy production and conversion                                                                                               | 3351843        | 3353147        | 430        | -1.20        | 1.13e-5         |
| plu2849         | CDS | yeeF   | -                                                                                                                 | COG0531        | E            | Amino acid transport and metabolism                                                                                            | 3380945        | 3382327        | 1457       | -1.11        | 1.11e-4         |
| plu2957         | CDS | -      | Similar to bacteriophage protein                                                                                  | COG4675        | S            | Function unknown                                                                                                               | 3460804        | 3461709        | 82         | -2.51        | 4.29e-7         |
| plu2958         | CDS | -      | putative tail fiber assembly protein                                                                              | COG1881        | R            | General function prediction only                                                                                               | 3462413        | 3462835        | 363        | -2.28        | 2.30e-11        |
| plu2959#        | CDS | -      | <b>Some similarities with bacteriophage protein</b>                                                               | <b>COG4675</b> | <b>S</b>     | <b>Function unknown</b>                                                                                                        | <b>3462838</b> | <b>3463425</b> | <b>462</b> | <b>-2.30</b> | <b>5.07e-13</b> |
| plu2960         | CDS | -      | Similar to bacteriophage tail fiber protein                                                                       | COG4675        | S            | Function unknown                                                                                                               | 3463959        | 3464723        | 104        | -3.36        | 4.42e-12        |
| plu2961         | CDS | -      | putative bacteriophage tail fiber protein                                                                         | COG4675        | S            | Function unknown                                                                                                               | 3465167        | 3466582        | 135        | -2.42        | 2.03e-8         |
| plu2962#        | CDS | -      | <b>putative bacteriophage tail fiber protein</b>                                                                  | <b>COG4675</b> | <b>S</b>     | <b>Function unknown</b>                                                                                                        | <b>3466665</b> | <b>3468149</b> | <b>207</b> | <b>-3.26</b> | <b>3.39e-16</b> |
| plu2972         | CDS | -      | conserved hypothetical protein                                                                                    |                | Unclassified | 3478972                                                                                                                        | 3479619        | 224            | -1.70      | 1.90e-5      |                 |
| plu2977         | CDS | -      | conserved hypothetical protein                                                                                    |                | Unclassified | 3481924                                                                                                                        | 3482754        | 48             | -2.87      | 2.64e-7      |                 |
| plu2978         | CDS | -      | putative Hcp protein                                                                                              | COG3157        | U            | Intracellular trafficking, secretion, and vesicular transport                                                                  | 3482762        | 3483241        | 68         | -4.01        | 1.83e-13        |
| plu3001         | CDS | -      | conserved hypothetical protein                                                                                    | COG3591        | E            | Amino acid transport and metabolism                                                                                            | 3502295        | 3503821        | 331        | -1.96        | 1.10e-8         |
| pluRNA3538 tRNA | -   | -      | transfert RNA-Thr                                                                                                 |                | Unclassified | 3538549                                                                                                                        | 3538624        | 844            | -1.21      | 4.59e-4      |                 |
| plu3044         | CDS | ahpD   | AhpD, carboxymuconolactone decarboxylase involved in 2,5-dihydrophenylalanine, precursor of 2,5-dihydroxystilbene | COG2128        | P            | Inorganic ion transport and metabolism                                                                                         | 3543179        | 3543721        | 477        | -1.14        | 7.00e-4         |
| plu3075         | CDS | phaxA2 | PhaxA2, similar to binary toxin XaxA of Xenorhabdus nematophila                                                   |                | Unclassified | 3585640                                                                                                                        | 3586866        | 40             | -2.61      | 1.20e-5      |                 |
| plu3090         | CDS | lrhA   | Transcriptional regulator LrhA (HexA)                                                                             | COG0583        | K            | Transcription                                                                                                                  | 3603871        | 3604800        | 1403       | -1.17        | 1.73e-6         |
| plu3095         | CDS | ackA   | acetate kinase (acetokinase)                                                                                      | COG0282        | C            | Energy production and conversion                                                                                               | 3611182        | 3612384        | 860        | -1.62        | 4.90e-12        |
| plu3096         | CDS | pta    | Phosphate acetyltransferase (phosphotransacetylase)                                                               | COG0280        | C            | Energy production and conversion                                                                                               | 3612456        | 3614597        | 1549       | -1.21        | 7.94e-9         |
| plu3098         | CDS | -      | conserved hypothetical protein                                                                                    |                | Unclassified | 3616168                                                                                                                        | 3616842        | 84             | -2.12      | 3.79e-5      |                 |
| plu3159         | CDS | pdl    | putative lipase of Photorhabdus luminescens, strain W14                                                           | COG3675        | I            | Lipid transport and metabolism                                                                                                 | 3718571        | 3720448        | 135        | -1.69        | 1.89e-4         |
| plu3181         | CDS | tctC   | Probable tricarboxylate transport protein TctC                                                                    | COG3181        | C            | Energy production and conversion                                                                                               | 3742383        | 3743363        | 54         | -1.55        | 3.67e-3         |
| plu3204         | CDS | -      | -                                                                                                                 | COG3103        | R            | General function prediction only                                                                                               | 3771375        | 3771728        | 2541       | -1.38        | 1.28e-8         |
| plu3219         | CDS | -      | Similar to probable transcription regulator, LuxR family                                                          | COG2771        | K            | Transcription                                                                                                                  | 3807331        | 3808020        | 757        | -1.69        | 2.74e-8         |
| plu3220         | CDS | -      | Similar to probable transcription regulator, LuxR family                                                          | COG2197        | TK           | Signal transduction mechanisms, Transcription                                                                                  | 3808060        | 3808746        | 871        | -1.71        | 1.58e-8         |
| plu3221         | CDS | -      | Similar to probable transcription regulator, LuxR family                                                          | COG2197        | TK           | Signal transduction mechanisms, Transcription                                                                                  | 3809059        | 3809727        | 183        | -2.21        | 9.46e-8         |
| plu3330         | CDS | -      | conserved hypothetical protein                                                                                    | COG4675        | S            | Function unknown                                                                                                               | 3959757        | 3960584        | 100        | -2.14        | 1.46e-5         |
| plu3563         | CDS | -      | putative p-aminobenzoic acid synthase                                                                             | COG0147        | EH           | Amino acid transport and metabolism, Coenzyme transport and metabolism                                                         | 4198009        | 4200084        | 495        | -1.37        | 1.75e-5         |
| plu3565         | CDS | -      | putative class II aminotransferase and 5-aminolevulinic acid synthase                                             | COG0156        | H            | Coenzyme transport and metabolism                                                                                              | 4200468        | 4201742        | 188        | -1.69        | 2.08e-5         |
| plu3566         | CDS | -      | putative methylase and with protoporphyrinogen oxidase                                                            | COG2890        | J            | Translation, ribosomal structure and biogenesis                                                                                | 4201767        | 4202618        | 129        | -2.37        | 3.15e-8         |
| plu3567         | CDS | -      | putative N-formimidoyl fortimicin A synthase                                                                      | COG0665        | E            | Amino acid transport and metabolism                                                                                            | 4202615        | 4204048        | 211        | -3.19        | 1.20e-16        |
| plu3611         | CDS | yggE   | -                                                                                                                 | COG2968        | S            | Function unknown                                                                                                               | 4259005        | 4259727        | 5876       | -1.25        | 5.93e-7         |
| plu3622         | CDS | aceF   | dihydroliipoamide acetyltransferase component of pyruvate dehydrogenase complex (E2)                              | COG0508        | C            | Energy production and conversion                                                                                               | 4271312        | 4272910        | 3617       | -1.53        | 2.85e-13        |
| plu3623         | CDS | aceE   | pyruvate dehydrogenase E1 component                                                                               | COG2609        | C            | Energy production and conversion                                                                                               | 4272925        | 4275588        | 6728       | -1.83        | 3.66e-18        |
| plu3624         | CDS | pdhR   | pyruvate dehydrogenase complex repressor                                                                          | COG2186        | K            | Transcription                                                                                                                  | 4275778        | 4276542        | 681        | -2.36        | 9.09e-20        |
| plu3669         | CDS | -      | conserved hypothetical protein                                                                                    | COG0790        | T            | Signal transduction mechanisms                                                                                                 | 4320004        | 4320630        | 187        | -1.61        | 7.26e-5         |
| plu3672         | CDS | leuO   | activator protein in leuABCD operon                                                                               | COG0583        | K            | Transcription                                                                                                                  | 4323714        | 4324658        | 265        | -1.43        | 5.98e-5         |
| plu3680         | CDS | speB   | agmatinase (agmatine ureohydrolase) (AUH)                                                                         | COG0010        | E            | Amino acid transport and metabolism                                                                                            | 4334743        | 4335666        | 865        | -1.09        | 2.18e-4         |
| plu3681         | CDS | speA   | biosynthetic arginine decarboxylase (ADC)                                                                         | COG1166        | E            | Amino acid transport and metabolism                                                                                            | 4335836        | 4337740        | 795        | -1.38        | 3.77e-6         |
| plu3682         | CDS | -      | hypothetical protein                                                                                              |                | Unclassified | 4337867                                                                                                                        | 4338079        | 438            | -1.20      | 4.40e-4      |                 |
| plu3739         | CDS | aldB   | Aldehyde dehydrogenase B (Lactaldehyde dehydrogenase)                                                             | COG1012        | C            | Energy production and conversion                                                                                               | 4409211        | 4410695        | 1813       | -1.23        | 8.43e-5         |
| plu3790         | CDS | cspi   | cold shock-like protein (CPS-I)                                                                                   | COG1278        | K            | Transcription                                                                                                                  | 4452723        | 4452938        | 6615       | -1.37        | 8.48e-9         |
| plu3983         | CDS | -      | hypothetical protein                                                                                              |                | Unclassified | 4670172                                                                                                                        | 4670273        | 213            | -1.43      | 6.98e-4      |                 |
| pluCD546868     | CDS | -      | -                                                                                                                 |                | Unclassified | 4686529                                                                                                                        | 4686873        | 433            | -1.08      | 1.53e-4      |                 |
| plu4011         | CDS | -      | -                                                                                                                 |                | Unclassified | 4702279                                                                                                                        | 4702785        | 127            | -1.51      | 1.28e-3      |                 |
| plu4089         | CDS | fis    | DNA-binding protein (Factor-for-inversion stimulation protein) (HIN recombinational enhancer binding protein)     | COG2901        | K            | Transcription                                                                                                                  | 4776705        | 4777001        | 4539       | -1.05        | 2.37e-5         |
| plu4186         | CDS | antI   | Hydrolase/peptidase AntI involved in anthraquinone biosynthesis (type II polyketide synthase)                     | COG1073        | T            | Signal transduction mechanisms                                                                                                 | 4898888        | 4900042        | 547        | -3.48        | 5.71e-29        |
| plu4187         | CDS | antH   | Cyclase/aromatase AntH involved in anthraquinone biosynthesis (type II polyketide synthase)                       | COG2867        | J            | Translation, ribosomal structure and biogenesis                                                                                | 4900062        | 4901504        | 339        | -2.67        | 8.14e-16        |
| plu4188         | CDS | antG   | CoA ligase AntG involved in anthraquinone biosynthesis (type II polyketide synthase)                              | COG0318        | IQ           | Lipid transport and metabolism, Secondary metabolites biosynthesis, transport and catabolism                                   | 4901504        | 4903051        | 182        | -3.69        | 5.46e-19        |
| plu4189         | CDS | antF   | Acyl carrier protein AntF involved in anthraquinone biosynthesis (type II polyketide synthase)                    | COG0236        | IQ           | Lipid transport and metabolism, Secondary metabolites biosynthesis, transport and catabolism                                   | 4903075        | 4903323        | 96         | -4.13        | 8.65e-17        |
| plu4190         | CDS | antE   | Ketosynthase KS-beta AntE involved in anthraquinone biosynthesis (type II polyketide synthase)                    | COG0304        | IQ           | Lipid transport and metabolism, Secondary metabolites biosynthesis, transport and catabolism                                   | 4903358        | 4904473        | 263        | -2.32        | 4.88e-11        |
| plu4191         | CDS | antD   | Ketosynthase KS-alpha AntD involved in anthraquinone biosynthesis (type II polyketide synthase)                   | COG0304        | IQ           | Lipid transport and metabolism, Secondary metabolites biosynthesis, transport and catabolism                                   | 4904466        | 4905752        | 302        | -3.68        | 1.33e-25        |
| plu4192         | CDS | antC   | Cyclase AntC involved in anthraquinone biosynthesis (type II polyketide synthase)                                 | COG1878        | E            | Amino acid transport and metabolism                                                                                            | 4906404        | 4907219        | 206        | -4.20        | 4.11e-25        |
| plu4193         | CDS | antB   | Phosphopantetheinyl transferase AntB involved in anthraquinone biosynthesis (type II polyketide synthase)         | COG2091        | H            | Coenzyme transport and metabolism                                                                                              | 4907212        | 4907925        | 295        | -4.70        | 1.82e-34        |
| plu4194         | CDS | antA   | Ketoreductase AntA involved in anthraquinone biosynthesis (type II polyketide synthase)                           | COG1028        | IQR          | Lipid transport and metabolism, Secondary metabolites biosynthesis, transport and catabolism, General function prediction only | 4907928        | 4908704        | 460        | -3.80        | 2.75e-33        |
| plu4230         | CDS | -      | conserved hypothetical protein                                                                                    |                | Unclassified | 4952453                                                                                                                        | 4953391        | 62             | -3.38      | 1.21e-10     |                 |
| plu4238         | CDS | -      | conserved hypothetical protein                                                                                    |                | Unclassified | 4960560                                                                                                                        | 4961522        | 77             | -4.28      | 9.27e-17     |                 |
| plu4241         | CDS | -      | -                                                                                                                 |                | Unclassified | 4964137                                                                                                                        | 4965018        | 45             | -2.19      | 1.83e-4      |                 |
| plu4242         | CDS | ppxA   | photopexin A                                                                                                      | COG1524        | R            | General function prediction only                                                                                               | 4965343        | 4967037        | 35         | -2.06        | 1.33e-3         |
| pluRNA4975 tRNA | -   | -      | transfert RNA-Leu                                                                                                 |                | Unclassified | 4975653                                                                                                                        | 4975739        | 223            | -1.22      | 2.94e-3      |                 |
| plu4336         | CDS | -      | -                                                                                                                 | COG3670        | Q            | Secondary metabolites biosynthesis, transport and catabolism                                                                   | 5064178        | 5065650        | 82         | -2.44        | 8.47e-7         |
| plu4382         | CDS | ditD   | DitD protein for D-alanine esterification of lipoteichoic acid and wall teichoic acid                             | COG3966        | M            | Cell wall/membrane/envelope biogenesis                                                                                         | 5116163        | 5117365        | 255        | -1.97        | 1.14e-7         |
| plu4383         | CDS | ditB   | DitB protein for D-alanine esterification of lipoteichoic acid and wall teichoic acid                             | COG1696        | M            | Cell wall/membrane/envelope biogenesis                                                                                         | 5117509        | 5118633        | 72         | -2.21        | 2.10e-5         |

|                  |     |      |                                                                                                                |         |    |                                                                                                               |         |         |         |       |          |
|------------------|-----|------|----------------------------------------------------------------------------------------------------------------|---------|----|---------------------------------------------------------------------------------------------------------------|---------|---------|---------|-------|----------|
| plu4384          | CDS | ditA | D-alanine-activating enzyme (DAE) [D-alanine-D-alanyl carrier protein ligase] (DCL)                            | COG1020 | Q  | Secondary metabolites biosynthesis, transport and catabolism                                                  | 5118630 | 5120093 | 90      | -1.68 | 1.13e-3  |
| plu4393          | CDS | -    | conserved hypothetical protein                                                                                 | COG0823 | U  | Intracellular trafficking, secretion, and vesicular transport                                                 | 5131421 | 5131987 | 117     | -2.40 | 1.95e-8  |
| plu4418          | CDS | -    | putative pyrrolidone-carboxylate peptidase (5-oxoprolyl-peptidase) (Pyroglutamyl-peptidase I) (PGP-I) (Pyrase) | COG2039 | O  | Posttranslational modification, protein turnover, chaperones                                                  | 5166814 | 5167470 | 104     | -1.71 | 3.63e-4  |
| plu4419          | CDS | -    | putative exported protein                                                                                      | COG3485 | Q  | Secondary metabolites biosynthesis, transport and catabolism                                                  | 5167715 | 5168548 | 99      | -1.92 | 2.51e-4  |
| plu4424          | CDS | -    | putative MFS transporter                                                                                       | COG2814 | G  | Carbohydrate transport and metabolism                                                                         | 5175988 | 5177184 | 198     | -2.44 | 5.27e-11 |
| plu4496          | CDS | -    | conserved hypothetical protein                                                                                 | COG2509 | R  | General function prediction only                                                                              | 5252293 | 5253813 | 179     | -3.01 | 3.92e-13 |
| pluCD552537      | CDS | -    | -                                                                                                              | COG3335 | X  | Mobilome: prophages, transposons                                                                              | 5253759 | 5254148 | 136     | -3.11 | 2.35e-12 |
| plu4502          | CDS | -    | -                                                                                                              | COG0023 | J  | Translation, ribosomal structure and biogenesis                                                               | 5259368 | 5259619 | 1.21e+4 | -1.10 | 3.25e-6  |
| plu4523          | CDS | deaD | inducible ATP-independent RNA helicase                                                                         | COG0513 | L  | Replication, recombination and repair                                                                         | 5281393 | 5283327 | 4394    | -1.15 | 6.34e-7  |
| plu4540          | CDS | obgE | DNA-binding GTPase involved in cell partitioning; multicopy suppressor of ftsI(rrm) (by similarity)            | COG0536 | DL | Cell cycle control, cell division, chromosome partitioning, Replication, recombination and repair             | 5302270 | 5303445 | 1651    | -1.08 | 3.63e-5  |
| plu4558#         | CDS | ecfJ | Function unknown; rpoE regulon; periplasmic protein; expressed protein (by similarity)                         | COG3054 | R  | General function prediction only                                                                              | 5321428 | 5321982 | 1426    | -1.21 | 1.66e-5  |
| plu4570          | CDS | rplI | 50S ribosomal subunit protein L9                                                                               | COG0359 | J  | Translation, ribosomal structure and biogenesis                                                               | 5336224 | 5336676 | 8280    | -1.02 | 1.33e-4  |
| plutRNA5359 tRNA | -   | -    | transfer RNA-Gly                                                                                               | -       | -  | Unclassified                                                                                                  | 5359645 | 5359720 | 980     | -1.09 | 3.29e-4  |
| plutRNA5359 tRNA | -   | -    | transfer RNA-Gly                                                                                               | -       | -  | Unclassified                                                                                                  | 5359917 | 5359992 | 378     | -1.18 | 5.46e-4  |
| plu4628          | CDS | -    | putative L-2,4-diaminobutyrate decarboxylase                                                                   | COG0076 | E  | Amino acid transport and metabolism                                                                           | 5394901 | 5396445 | 104     | -1.46 | 2.17e-4  |
| plu4629          | CDS | -    | -                                                                                                              | COG3486 | Q  | Secondary metabolites biosynthesis, transport and catabolism                                                  | 5396476 | 5397777 | 66      | -1.49 | 2.28e-3  |
| plu4630          | CDS | -    | putative rhizobactin and aerobactin siderophores biosynthesis proteins RhsF and LucC                           | COG1670 | JO | Translation, ribosomal structure and biogenesis, Posttranslational modification, protein turnover, chaperones | 5397777 | 5400194 | 184     | -1.07 | 4.18e-3  |
| plu4668          | CDS | ilvC | ketol-acid reductoisomerase (acetohydroxy-acidisomeroeductase) (alpha-keto-beta-hydroxylacil reductoisomerase) | COG0059 | EH | Amino acid transport and metabolism, Coenzyme transport and metabolism                                        | 5443372 | 5444850 | 5347    | -2.14 | 6.40e-24 |
| plu4748#         | CDS | -    | -                                                                                                              | -       | -  | Unclassified                                                                                                  | 5528419 | 5529000 | 1453    | -1.93 | 7.79e-13 |
| plu4758          | CDS | rpmE | 50S ribosomal subunit protein L31                                                                              | COG0254 | J  | Translation, ribosomal structure and biogenesis                                                               | 5539633 | 5539848 | 8211    | -1.02 | 3.71e-5  |
| plu4844          | CDS | ppyS | ketosynthase responsible for production of pyrone, signaling molecule causing Photorhabdus cell clumping       | COG0332 | I  | Lipid transport and metabolism                                                                                | 5617384 | 5618445 | 18      | -2.18 | 2.94e-3  |
| plu4873          | CDS | -    | conserved hypothetical protein                                                                                 | -       | -  | Unclassified                                                                                                  | 5645829 | 5646260 | 576     | -1.19 | 3.39e-4  |
| plu4892          | CDS | -    | -                                                                                                              | COG0500 | QR | Secondary metabolites biosynthesis, transport and catabolism, General function prediction only                | 5665879 | 5666832 | 36      | -2.58 | 9.73e-5  |

**Supplementary Table 3C:** List of 237 genes overexpressed in *P. luminescens* TT01 between LB culture and LB+polyB culture (logarithmic phase, FDR  $\leq 0.005$ ,  $abs(\log_2FC) \geq 1$ )  
 # indicates the genes belonging to the PhoP regulon in LB broth.  
 ## indicates the genes belonging to the core PhoP regulon  
 \* ratio LB+polyB/LB

Colors highlight some functional categories:  
 components of secretion system (33 genes)  
 insecticidal toxins (9 genes)  
 transporter (25 genes)  
 extracellular enzymes

| Label       | Type | Name  | Product                                                                                                   | COG_ID  | COG_classID | COGClassDescription                                                         | Begin   | End     | normalized average read count | log2 fold change* | adjusted pvalue (FDR) |
|-------------|------|-------|-----------------------------------------------------------------------------------------------------------|---------|-------------|-----------------------------------------------------------------------------|---------|---------|-------------------------------|-------------------|-----------------------|
| plu0052     | CDS  | asnA  | Aspartate--ammonia ligase (Asparagine synthetase A)                                                       | COG2502 | E           | Amino acid transport and metabolism                                         | 46030   | 47022   | 637                           | 1.92              | 1.04e-9               |
| plu0072     | CDS  | ycjG  | -                                                                                                         | COG4147 | C           | conversion                                                                  | 69280   | 70929   | 370                           | 1.41              | 3.72e-5               |
| plu0073     | CDS  | ycjH  | -                                                                                                         | COG3162 | S           | Function unknown                                                            | 70926   | 71237   | 34                            | 2.02              | 6.47e-4               |
| plu0074#    | CDS  | acs   | acetyl-coenzyme A synthetase [acetate--COA ligase] (acyl-activating enzyme)                               | COG0365 | I           | Lipid transport and metabolism                                              | 71302   | 73257   | 1315                          | 1.92              | 3.29e-14              |
| plu0082     | CDS  | -     | conserved hypothetical protein                                                                            | COG5572 | S           | Function unknown                                                            | 78376   | 78669   | 174                           | 1.22              | 4.44e-3               |
| plu0100     | CDS  | pckA  | phosphoenolpyruvate carboxykinase [ATP]                                                                   | COG1866 | C           | conversion                                                                  | 96415   | 98034   | 1188                          | 1.13              | 1.24e-5               |
| plu0112     | CDS  | cynS  | cyanate lyase (cyanate hydrolase) (cyanase)                                                               | COG1513 | P           | Inorganic ion transport and metabolism                                      | 115374  | 115844  | 157                           | 1.23              | 4.63e-3               |
| plu0121     | CDS  | uspA  | universal stress protein A                                                                                | COG0589 | T           | mechanisms                                                                  | 126961  | 127392  | 1033                          | 1.11              | 3.98e-5               |
| plu0208     | CDS  | feoB  | ferrous iron transport protein B                                                                          | COG0370 | P           | Inorganic ion transport and metabolism                                      | 211862  | 214174  | 703                           | 1.36              | 1.84e-5               |
| plu0209     | CDS  | feoA  | ferrous iron transport protein A                                                                          | COG1918 | P           | metabolism                                                                  | 214227  | 214460  | 195                           | 1.56              | 1.63e-4               |
| plu0224     | CDS  | -     | conserved hypothetical protein                                                                            | -       | -           | Unclassified                                                                | 229778  | 230323  | 189                           | 2.83              | 4.45e-14              |
| plu0225     | CDS  | -     | Putative TpsA-related protein                                                                             | COG3210 | U           | Intracellular trafficking, secretion, and vesicular transport               | 230329  | 235488  | 737                           | 3.62              | 7.75e-35              |
| plu0226     | CDS  | -     | TpsB protein                                                                                              | COG2831 | U           | transport                                                                   | 235518  | 237197  | 176                           | 4.53              | 3.48e-25              |
| plu0228     | CDS  | -     | conserved hypothetical protein                                                                            | COG1807 | M           | biogenesis                                                                  | 237589  | 239052  | 472                           | 1.16              | 6.75e-4               |
| plu0300     | CDS  | dppA  | Periplasmic dipeptide transport protein precursor DppA                                                    | COG0747 | E           | Amino acid transport and metabolism                                         | 317950  | 319557  | 852                           | 2.15              | 7.06e-16              |
| plu0301     | CDS  | dppB  | Dipeptide transport system permease protein DppB                                                          | COG0601 | EP          | Amino acid transport and metabolism, Inorganic ion transport and metabolism | 319676  | 320695  | 249                           | 1.99              | 1.21e-8               |
| plu0302     | CDS  | dppC  | Dipeptide transport system permease protein DppC                                                          | COG1173 | EP          | Amino acid transport and metabolism, Inorganic ion transport and metabolism | 320706  | 321605  | 345                           | 1.80              | 2.56e-8               |
| plu0303     | CDS  | dppD  | Dipeptide transport ATP-binding protein dppD                                                              | COG0444 | EP          | Amino acid transport and metabolism                                         | 321618  | 322598  | 269                           | 2.00              | 9.47e-9               |
| plu0304     | CDS  | dppF  | Dipeptide transport ATP-binding protein dppF                                                              | COG4608 | E           | metabolism                                                                  | 322595  | 323614  | 414                           | 1.33              | 7.85e-5               |
| plu0418     | CDS  | -     | Major structural subunit MrpA of Proteus mirabilis                                                        | COG3539 | N           | Cell motility                                                               | 447141  | 447707  | 210                           | 1.34              | 1.66e-4               |
| plu0441     | CDS  | -     | conserved hypothetical protein                                                                            | COG4683 | S           | Function unknown                                                            | 472833  | 473132  | 169                           | 1.33              | 3.15e-3               |
| plu0515     | CDS  | tcaC  | B component of insecticidal toxin complex, protein TcaC                                                   | COG3209 | R           | only                                                                        | 567083  | 571540  | 381                           | 1.37              | 2.78e-5               |
| plu0525     | CDS  | -     | Similar to probable acetyltransferase                                                                     | COG0456 | J           | Translation, ribosomal structure and biogenesis                             | 582031  | 582573  | 101                           | 1.97              | 2.08e-5               |
| plu0526     | CDS  | -     | conserved hypothetical protein                                                                            | -       | -           | Unclassified                                                                | 582534  | 583718  | 96                            | 2.95              | 5.10e-10              |
| pluCDS05837 | CDS  | -     | -                                                                                                         | -       | -           | Unclassified                                                                | 583732  | 584238  | 153                           | 1.48              | 6.70e-4               |
| plu0527     | CDS  | -     | conserved hypothetical protein                                                                            | COG3220 | S           | Function unknown                                                            | 584213  | 584992  | 151                           | 2.89              | 2.19e-12              |
| plu0528     | CDS  | -     | Conserved hypothetical protein                                                                            | COG3220 | S           | Function unknown                                                            | 584996  | 586072  | 419                           | 3.69              | 1.42e-29              |
| plu0528     | CDS  | ycdB  | -                                                                                                         | -       | -           | Unclassified                                                                | 712917  | 713402  | 181                           | 2.21              | 5.10e-3               |
| plu0634     | CDS  | -     | Toxin secretion ABC transporter protein, HlyB family                                                      | COG2274 | V           | Defense mechanisms                                                          | 726383  | 728518  | 2133                          | 3.69              | 2.64e-46              |
| plu0635     | CDS  | -     | HlyD family secretion protein                                                                             | COG0845 | MV          | biogenesis, Defense mechanisms                                              | 728660  | 730075  | 589                           | 3.85              | 9.48e-36              |
| plu0636     | CDS  | -     | conserved hypothetical protein                                                                            | -       | -           | Unclassified                                                                | 730185  | 730706  | 331                           | 3.38              | 1.87e-23              |
| plu0637     | CDS  | -     | conserved hypothetical protein                                                                            | COG0722 | E           | Amino acid transport and metabolism                                         | 730755  | 731276  | 640                           | 3.68              | 2.52e-35              |
| plu0638     | CDS  | -     | conserved hypothetical protein                                                                            | -       | -           | Unclassified                                                                | 731335  | 731856  | 530                           | 3.60              | 4.90e-31              |
| plu0639     | CDS  | -     | conserved hypothetical protein                                                                            | -       | -           | Unclassified                                                                | 731915  | 732445  | 698                           | 3.72              | 7.24e-37              |
| plu0640     | CDS  | -     | Conserved hypothetical protein                                                                            | COG5000 | T           | Signal transduction                                                         | 732504  | 733025  | 1231                          | 3.78              | 1.83e-45              |
| plu0641     | CDS  | -     | conserved hypothetical protein                                                                            | -       | -           | Unclassified                                                                | 733074  | 733595  | 461                           | 3.93              | 1.02e-35              |
| plu0642     | CDS  | -     | conserved hypothetical protein                                                                            | -       | -           | Unclassified                                                                | 733644  | 734165  | 1125                          | 3.93              | 7.70e-48              |
| plu0643     | CDS  | -     | Putative transmembrane protein. The central region presents some similarities with propeptide convertase. | COG1404 | O           | Posttranslational modification, protein turnover, chaperones                | 734216  | 740587  | 7912                          | 3.64              | 2.42e-54              |
| plu0691#    | CDS  | cutF  | Copper homeostasis protein CutF precursor                                                                 | COG3015 | MV          | Cell wall/membrane/envelope biogenesis, Defense mechanisms                  | 794390  | 795061  | 3705                          | 1.60              | 2.51e-10              |
| plu0824     | CDS  | -     | Some similarities with gp31 protein of Bacteriophage                                                      | -       | -           | Unclassified                                                                | 955418  | 956575  | 122                           | 1.27              | 4.46e-3               |
| plu0842     | CDS  | speD  | S-adenosylmethionine decarboxylase proenzyme                                                              | COG1586 | E           | Amino acid transport and metabolism                                         | 973875  | 974669  | 644                           | 1.43              | 8.83e-7               |
| plu0843     | CDS  | speE  | spermidine synthase (putrescine aminopropyltransferase)                                                   | COG0421 | E           | Amino acid transport and metabolism                                         | 974708  | 975577  | 948                           | 2.02              | 8.62e-14              |
| plu0884     | CDS  | -     | conserved hypothetical protein                                                                            | COG3266 | D           | Cell cycle control, cell division, chromosome partitioning                  | 1012869 | 1014542 | 2543                          | 1.33              | 5.35e-8               |
| plu0885     | CDS  | -     | putative pyocin S3 immunity protein                                                                       | -       | -           | Unclassified                                                                | 1014542 | 1014994 | 3375                          | 1.20              | 1.07e-7               |
| plu0886     | CDS  | -     | Putative pyocin S3 immunity protein                                                                       | -       | -           | Unclassified                                                                | 1015076 | 1015528 | 551                           | 1.21              | 1.53e-5               |
| plu0887     | CDS  | -     | C-terminal region of klebicin B, pyocin S2 and the killer protein of pyocin S1                            | COG4104 | U           | Intracellular trafficking, secretion, and vesicular transport               | 1015625 | 1016074 | 430                           | 1.34              | 6.28e-6               |
| plu0888     | CDS  | -     | putative colicin / pyocin immunity protein                                                                | -       | -           | Unclassified                                                                | 1016082 | 1016333 | 713                           | 1.46              | 3.60e-8               |
| plu0902     | CDS  | hemL  | glutamate-1-semialdehyde 2,1-aminomutase                                                                  | COG0001 | H           | Coenzyme transport and metabolism                                           | 1036929 | 1038212 | 1225                          | 1.45              | 1.07e-7               |
| plu0903     | CDS  | -     | conserved hypothetical protein                                                                            | COG0657 | I           | Lipid transport and metabolism                                              | 1038263 | 1039048 | 862                           | 1.85              | 1.47e-10              |
| plu0932     | CDS  | -     | hypothetical protein                                                                                      | COG1708 | R           | General function prediction only                                            | 1073495 | 1074538 | 152                           | 4.07              | 8.51e-22              |
| plu0933     | CDS  | -     | Conserved hypothetical protein                                                                            | -       | -           | Unclassified                                                                | 1074544 | 1075578 | 60                            | 4.50              | 5.89e-15              |
| plu0934     | CDS  | -     | -                                                                                                         | COG0483 | G           | Carbohydrate transport and metabolism                                       | 1075575 | 1076420 | 24                            | 4.18              | 6.00e-8               |
| plu0935     | CDS  | -     | Putative biotin synthase-related enzyme                                                                   | COG2516 | R           | General function prediction only                                            | 1076423 | 1077556 | 48                            | 3.10              | 2.60e-8               |
| plu0961     | CDS  | tcdB1 | B component of insecticidal toxin complex, protein TcdB1                                                  | COG3209 | R           | only                                                                        | 1103029 | 1107459 | 212                           | 1.80              | 6.76e-7               |
| plu0962     | CDS  | tcdA1 | A component of insecticidal toxin complex, protein TcdA1                                                  | COG0497 | L           | Repair                                                                      | 1107512 | 1115089 | 423                           | 2.00              | 3.31e-11              |
| plu0969     | CDS  | tcdB2 | B component of insecticidal toxin complex, protein TcdB2                                                  | COG3209 | R           | only                                                                        | 1132074 | 1136501 | 105                           | 2.70              | 7.36e-10              |
| plu0970     | CDS  | tcdA2 | A component of insecticidal toxin complex, protein TcdA1                                                  | COG0497 | L           | repair                                                                      | 1136558 | 1143892 | 264                           | 3.48              | 1.30e-23              |
| plu0973     | CDS  | -     | putative di-tripeptide transporter protein YhiP of Escherichia coli                                       | COG3104 | E           | Amino acid transport and metabolism                                         | 1152675 | 1154144 | 310                           | 1.97              | 1.72e-10              |
| plu1010     | CDS  | -     | hypothetical protein                                                                                      | -       | -           | Unclassified                                                                | 1195389 | 1195637 | 81                            | 1.58              | 8.97e-4               |
| plu1012     | CDS  | -     | conserved hypothetical protein                                                                            | COG5441 | S           | Function unknown                                                            | 1196502 | 1197746 | 694                           | 1.16              | 2.47e-5               |

|             |     |       |                                                                                                                                                                |         |    |                                                                                                                                |         |         |      |      |          |
|-------------|-----|-------|----------------------------------------------------------------------------------------------------------------------------------------------------------------|---------|----|--------------------------------------------------------------------------------------------------------------------------------|---------|---------|------|------|----------|
| plu1149     | CDS | -     | CdiA protein (TpsA-related family); presence of the VENN motif and DUF638 domain                                                                               | COG3210 | U  | Intracellular trafficking, secretion, and vesicular transport<br>Intracellular trafficking, secretion, and vesicular transport | 1327789 | 1336602 | 7344 | 2.53 | 3.65e-28 |
| plu1150     | CDS | -     | CdiB protein (TpsB family)                                                                                                                                     | COG2831 | U  | Intracellular trafficking, secretion, and vesicular transport                                                                  | 1336651 | 1338315 | 2726 | 2.33 | 2.52e-23 |
| plu1192     | CDS | fadE  | -                                                                                                                                                              | COG1960 | I  | Lipid transport and metabolism                                                                                                 | 1374488 | 1376923 | 128  | 1.46 | 1.24e-3  |
| plu1234     | CDS | -     | putative exported protein<br>Highly similar to probable sigma-54 modulation protein YfiA of Escherichia coli                                                   | COG0584 | I  | Lipid transport and metabolism<br>Translation, ribosomal structure and biogenesis                                              | 1426574 | 1427470 | 60   | 1.75 | 9.01e-4  |
| plu1266     | CDS | yfiA  | -                                                                                                                                                              | COG1544 | J  | Amino acid transport and metabolism                                                                                            | 1466407 | 1466769 | 92   | 1.95 | 3.37e-5  |
| plu1306     | CDS | gluJ  | Glutamate/aspartate transport system permease protein GluJ                                                                                                     | COG0765 | E  | Amino acid transport and metabolism, Signal transduction mechanisms                                                            | 1514978 | 1515718 | 114  | 1.67 | 4.05e-4  |
| plu1307     | CDS | gluI  | Glutamate/aspartate transport system permease protein GluI                                                                                                     | COG0834 | ET | transduction mechanisms                                                                                                        | 1515851 | 1516744 | 579  | 2.04 | 1.03e-12 |
| pluCDS16291 | CDS | -     | -                                                                                                                                                              | -       | -  | Unclassified                                                                                                                   | 1629184 | 1629867 | 697  | 2.26 | 5.21e-18 |
| plu1367     | CDS | -     | CdiA protein (TpsA-related family); presence of the VENN motif and DUF638 domain                                                                               | COG3210 | U  | Intracellular trafficking, secretion, and vesicular transport<br>Intracellular trafficking, secretion, and vesicular transport | 1629806 | 1638691 | 3391 | 2.92 | 5.98e-35 |
| plu1368     | CDS | -     | CdiB protein (TpsB family)                                                                                                                                     | COG2831 | U  | Intracellular trafficking, secretion, and vesicular transport                                                                  | 1638740 | 1640404 | 495  | 3.01 | 2.76e-24 |
| plu1419     | CDS | kdpB  | potassium-transporting ATPase B chain                                                                                                                          | COG2216 | P  | Inorganic ion transport and metabolism                                                                                         | 1704464 | 1706530 | 40   | 1.82 | 6.40e-4  |
| plu1420     | CDS | kdpA  | potassium-transporting ATPase A chain<br>Similar to MccB protein of Escherichia coli, involved in the production of microcin C7                                | COG2060 | P  | Inorganic ion transport and metabolism                                                                                         | 1706551 | 1708257 | 72   | 1.85 | 7.93e-5  |
| plu1515     | CDS | -     | -                                                                                                                                                              | COG0476 | H  | Coenzyme transport and metabolism                                                                                              | 1814537 | 1815595 | 134  | 1.99 | 1.19e-6  |
| plu1579##   | CDS | -     | putative bacitracin transport permease YbjG of Escherichia coli                                                                                                | COG0671 | I  | Lipid transport and metabolism                                                                                                 | 1888106 | 1888714 | 741  | 1.82 | 2.45e-10 |
| plu1592     | CDS | cspD  | Cold shock-like protein CspD                                                                                                                                   | COG1278 | K  | Transcription                                                                                                                  | 1899373 | 1899594 | 192  | 1.79 | 3.02e-6  |
| plu1694     | CDS | -     | conserved hypothetical protein                                                                                                                                 | -       | -  | Unclassified                                                                                                                   | 2021795 | 2023357 | 11   | 2.79 | 1.69e-3  |
| plu1697     | CDS | -     | conserved hypothetical protein                                                                                                                                 | COG3422 | S  | Function unknown                                                                                                               | 2025763 | 2028669 | 28   | 2.00 | 2.12e-3  |
| plu1698     | CDS | -     | conserved hypothetical protein                                                                                                                                 | COG3299 | X  | Mobilome: prophages, transposons                                                                                               | 2028666 | 2031368 | 30   | 1.95 | 2.42e-3  |
| plu1706     | CDS | -     | conserved hypothetical protein                                                                                                                                 | COG3497 | X  | Mobilome: prophages, transposons                                                                                               | 2036552 | 2038036 | 265  | 3.50 | 2.37e-22 |
| plu1707     | CDS | -     | conserved hypothetical protein                                                                                                                                 | COG3497 | X  | Mobilome: prophages, transposons                                                                                               | 2038048 | 2039124 | 148  | 3.92 | 4.44e-20 |
| plu1708     | CDS | -     | conserved hypothetical protein                                                                                                                                 | COG0399 | M  | Cell wall/membrane/envelope biogenesis                                                                                         | 2039178 | 2039627 | 55   | 4.24 | 4.78e-14 |
| plu1780     | CDS | mgsA  | methylglyoxal synthase                                                                                                                                         | COG1803 | G  | Carbohydrate transport and metabolism                                                                                          | 2125558 | 2126016 | 53   | 1.82 | 1.66e-3  |
| plu1808     | CDS | -     | hypothetical protein                                                                                                                                           | -       | -  | Unclassified                                                                                                                   | 2156934 | 2157293 | 189  | 1.32 | 1.16e-3  |
| plu1813     | CDS | -     | putative di-tripeptide ABC transporter                                                                                                                         | COG3104 | E  | Amino acid transport and metabolism                                                                                            | 2159566 | 2161104 | 120  | 2.50 | 3.71e-9  |
| plu1864     | CDS | -     | Truncated gene. Putative phosphoenolpyruvate phosphomutase                                                                                                     | COG0615 | M  | Cell wall/membrane/envelope biogenesis                                                                                         | 2210011 | 2210184 | 98   | 3.96 | 3.15e-17 |
| plu1865     | CDS | -     | Truncated gene. Putative phosphoenolpyruvate phosphomutase                                                                                                     | COG2513 | G  | Carbohydrate transport and metabolism                                                                                          | 2210256 | 2210996 | 57   | 2.90 | 1.15e-8  |
| plu1866     | CDS | -     | Similar to nitrilotriacetate monoxygenase component A                                                                                                          | COG2141 | HR | Coenzyme transport and metabolism, General function prediction only                                                            | 2211178 | 2212509 | 73   | 3.57 | 9.74e-12 |
| plu1867     | CDS | -     | Truncated gene, similar to N-terminal of homocitrate synthase                                                                                                  | COG0119 | E  | Amino acid transport and metabolism                                                                                            | 2212546 | 2213232 | 61   | 2.92 | 1.01e-8  |
| plu1868     | CDS | -     | Truncated gene, similar to C-terminal of homocitrate synthase                                                                                                  | COG0119 | E  | Amino acid transport and metabolism                                                                                            | 2213239 | 2213682 | 38   | 2.84 | 1.00e-6  |
| plu1869     | CDS | -     | Similar to large subunit of 3-isopropylmalate dehydratase, large subunit                                                                                       | COG0065 | E  | Amino acid transport and metabolism                                                                                            | 2213679 | 2214920 | 151  | 1.92 | 7.66e-7  |
| plu1870     | CDS | -     | Similar to 3-isopropylmalate dehydratase, small subunit (IeuD-2)                                                                                               | COG0066 | E  | Amino acid transport and metabolism                                                                                            | 2214913 | 2215470 | 43   | 1.62 | 3.58e-3  |
| plu1871     | CDS | -     | Putative methyltransferases                                                                                                                                    | COG2226 | H  | Coenzyme transport and metabolism                                                                                              | 2215467 | 2216252 | 53   | 1.80 | 8.09e-4  |
| plu1882     | CDS | syiC  | Similar to non-ribosomal peptide synthetase (NRPS) proline dehydrogenase (Proline oxidase) / delta-1-pyrroline-5-carboxylate dehydrogenase (p5C dehydrogenase) | COG0506 | E  | Unclassified                                                                                                                   | 2240985 | 2242391 | 213  | 1.24 | 1.22e-3  |
| plu1957     | CDS | putA  | putA                                                                                                                                                           | COG0506 | E  | Amino acid transport and metabolism                                                                                            | 2322639 | 2326619 | 1675 | 1.33 | 1.26e-7  |
| plu1958     | CDS | putP  | Sodium/proline symporter (Proline permease)                                                                                                                    | COG0591 | E  | Amino acid transport and metabolism                                                                                            | 2327106 | 2328590 | 3142 | 1.03 | 3.69e-5  |
| plu1975     | CDS | -     | putative xenobiotic reductase B and NAD(P)H-dependent 2-cyclohexen-1-one reductase homolog                                                                     | COG1902 | C  | Energy production and conversion                                                                                               | 2348123 | 2349178 | 296  | 2.23 | 5.54e-11 |
| plu1979     | CDS | sgcA  | Putative phosphotransferase enzyme II, A component SgcA                                                                                                        | COG1762 | GT | Carbohydrate transport and metabolism, Signal transduction mechanisms                                                          | 2351773 | 2352216 | 284  | 1.04 | 1.22e-3  |
| plu1992     | CDS | fruB  | PTS system, fructose-specific IIA/FPr component                                                                                                                | COG1925 | TG | Signal transduction mechanisms, Carbohydrate transport and metabolism                                                          | 2362665 | 2363792 | 488  | 3.37 | 4.01e-28 |
| plu1993     | CDS | fruA  | PTS system, fructose-specific IIBC component                                                                                                                   | COG1299 | G  | Carbohydrate transport and metabolism                                                                                          | 2363862 | 2365532 | 303  | 2.50 | 1.00e-13 |
| plu1996     | CDS | yhfX  | -                                                                                                                                                              | COG3457 | E  | Amino acid transport and metabolism                                                                                            | 2367087 | 2368265 | 698  | 1.50 | 4.19e-8  |
| plu2133     | CDS | yeaY  | -                                                                                                                                                              | COG3065 | M  | Cell wall/membrane/envelope biogenesis                                                                                         | 2516428 | 2517006 | 877  | 1.24 | 1.71e-5  |
| plu2153     | CDS | -     | conserved hypothetical protein                                                                                                                                 | COG1376 | M  | Cell wall/membrane/envelope biogenesis                                                                                         | 2538015 | 2538377 | 84   | 3.37 | 9.33e-13 |
| plu2191     | CDS | -     | Similarity with diaminobutyric acid aminotransferase                                                                                                           | COG0160 | E  | Amino acid transport and metabolism                                                                                            | 2576697 | 2580116 | 3267 | 3.51 | 2.40e-44 |
| plu2192     | CDS | -     | Similar to molybdopterin and thiamine biosynthesis protein                                                                                                     | COG0476 | H  | Coenzyme transport and metabolism                                                                                              | 2580119 | 2581237 | 799  | 3.12 | 3.48e-28 |
| plu2193     | CDS | -     | Putative gamma-butyrobetaine,2-oxoglutarate                                                                                                                    | COG2175 | Q  | Secondary metabolites biosynthesis, transport and catabolism                                                                   | 2581248 | 2582255 | 753  | 3.09 | 2.51e-27 |
| plu2194     | CDS | -     | Similar to acetyltransferase                                                                                                                                   | COG0456 | J  | Translation, ribosomal structure and biogenesis                                                                                | 2582304 | 2582744 | 389  | 3.27 | 1.45e-23 |
| plu2195     | CDS | -     | Hypothetical protein                                                                                                                                           | COG2843 | M  | Cell wall/membrane/envelope biogenesis                                                                                         | 2582780 | 2583016 | 126  | 3.16 | 9.62e-13 |
| plu2196     | CDS | -     | Similar to capsule biosynthesis protein                                                                                                                        | COG2843 | M  | Cell wall/membrane/envelope biogenesis                                                                                         | 2582988 | 2583881 | 543  | 3.17 | 3.48e-25 |
| plu2197     | CDS | -     | Similar to NikS protein involved in the biosynthesis of the peptidyl nucleoside antibiotic nikkomycin                                                          | COG0026 | F  | Nucleotide transport and metabolism                                                                                            | 2583890 | 2585077 | 631  | 3.06 | 1.90e-25 |
| plu2198     | CDS | -     | Similar to the phosphoribosylamine-glycine ligase                                                                                                              | COG0151 | F  | Nucleotide transport and metabolism                                                                                            | 2585118 | 2586380 | 558  | 3.02 | 2.31e-24 |
| plu2199     | CDS | -     | Similar to permeases of the major facilitator superfamily                                                                                                      | COG2271 | G  | Carbohydrate transport and metabolism                                                                                          | 2586407 | 2587792 | 464  | 2.79 | 2.14e-20 |
| plu2200     | CDS | -     | Similar to glutamyl-tRNA(Gln) amidotransferase chain A                                                                                                         | COG0154 | J  | Translation, ribosomal structure and biogenesis                                                                                | 2587792 | 2589135 | 399  | 2.41 | 9.35e-15 |
| plu2231     | CDS | ynfD  | -                                                                                                                                                              | -       | -  | Unclassified                                                                                                                   | 2624343 | 2624606 | 695  | 1.37 | 1.47e-6  |
| plu2232     | CDS | ynfB  | -                                                                                                                                                              | COG1508 | K  | Transcription                                                                                                                  | 2624622 | 2624984 | 679  | 1.33 | 3.62e-6  |
| plu2238     | CDS | attM  | NAHL lactonase ; Zn-metallohydrolase family                                                                                                                    | COG0491 | R  | General function prediction only                                                                                               | 2632964 | 2633734 | 59   | 1.57 | 1.38e-3  |
| plu2313     | CDS | -     | Lipase                                                                                                                                                         | COG2931 | Q  | Secondary metabolites biosynthesis, transport and catabolism                                                                   | 2709005 | 2710858 | 173  | 1.29 | 1.91e-3  |
| plu2326     | CDS | txp40 | Txp40, 40 kDa insecticidal protein (previously name A24tox)                                                                                                    | -       | -  | Unclassified                                                                                                                   | 2744886 | 2745893 | 81   | 3.33 | 7.68e-12 |
| plu2347     | CDS | goaG  | 4-aminobutyrate aminotransferase (gamma-amino-N-butyrate transaminase) (GABA transaminase)                                                                     | COG0160 | E  | Amino acid transport and metabolism                                                                                            | 2764455 | 2765732 | 46   | 1.69 | 4.63e-3  |
| plu2412     | CDS | -     | conserved hypothetical protein                                                                                                                                 | COG1216 | G  | Carbohydrate transport and metabolism                                                                                          | 2832866 | 2833933 | 193  | 1.06 | 1.84e-3  |

|             |     |       |                                                                                                                                                                                                                       |              |    |         |         |      |      |          |
|-------------|-----|-------|-----------------------------------------------------------------------------------------------------------------------------------------------------------------------------------------------------------------------|--------------|----|---------|---------|------|------|----------|
| plu2420     | CDS | -     | -                                                                                                                                                                                                                     | Unclassified |    | 2839044 | 2843954 | 262  | 1.82 | 6.68e-8  |
| plu2453     | CDS | -     | Putative TpsA-related protein                                                                                                                                                                                         | COG3210      | U  | 2880371 | 2885434 | 126  | 2.05 | 1.70e-6  |
| plu2480##   | CDS | ail1  | All protein precursor of Yersinia                                                                                                                                                                                     | COG3637      | M  | 2920701 | 2921228 | 3938 | 2.29 | 2.09e-21 |
| plu2507#    | CDS | ygbJ  | Highly similar to hypothetical oxidoreductase YgbJ of Escherichia coli<br>Function unknown; regulated by FliDC and FliA; mutants are not defective in motility or chemotaxis (by similarity)                          | COG2084      | I  | 2951054 | 2951959 | 803  | 1.87 | 2.51e-9  |
| plu2508     | CDS | ygbK  | -                                                                                                                                                                                                                     | COG3395      | S  | 2951959 | 2953236 | 607  | 2.05 | 3.54e-10 |
| plu2509     | CDS | ygbL  | -                                                                                                                                                                                                                     | COG0235      | G  | 2953229 | 2953870 | 319  | 2.14 | 8.41e-9  |
| plu2510     | CDS | ygbM  | -                                                                                                                                                                                                                     | COG3622      | G  | 2953889 | 2954668 | 439  | 2.01 | 4.73e-9  |
| plu2511     | CDS | ygbI  | -                                                                                                                                                                                                                     | COG1349      | KG | 2954681 | 2955448 | 383  | 2.30 | 3.76e-11 |
| plu2512#    | CDS | -     | Putative nucleoside-diphosphate-sugar epimerase                                                                                                                                                                       | COG0451      | M  | 2955621 | 2956586 | 441  | 2.58 | 1.68e-14 |
| plu2513     | CDS | -     | -                                                                                                                                                                                                                     | COG2610      | GR | 2956589 | 2957974 | 549  | 2.27 | 7.53e-13 |
| plu2560     | CDS | dadX  | Alanine racemase, catabolic                                                                                                                                                                                           | COG0787      | M  | 3004014 | 3005102 | 300  | 1.63 | 3.84e-7  |
| plu2561     | CDS | dadA  | D-amino acid dehydrogenase small subunit                                                                                                                                                                              | COG0665      | E  | 3005109 | 3006422 | 278  | 1.80 | 2.05e-8  |
| plu2598     | CDS | ydhH  | -                                                                                                                                                                                                                     | COG2377      | M  | 3041021 | 3042139 | 371  | 1.71 | 2.52e-7  |
| plu2599     | CDS | slyB  | Outer membrane lipoprotein SlyB precursor                                                                                                                                                                             | COG3133      | M  | 3042481 | 3042951 | 4157 | 1.18 | 2.26e-6  |
| plu2609     | CDS | -     | -                                                                                                                                                                                                                     | COG2309      | E  | 3051950 | 3052927 | 167  | 1.19 | 1.10e-3  |
| pluCD530530 | CDS | -     | hypothetical protein                                                                                                                                                                                                  | COG0469      | G  | 3053012 | 3053125 | 300  | 1.17 | 6.83e-5  |
| plu2653     | CDS | nlpC  | Probable lipoprotein NlpC precursor                                                                                                                                                                                   | COG0791      | M  | 3107082 | 3107567 | 119  | 2.01 | 4.15e-6  |
| plu2654     | CDS | pbgE3 | 4-amino-4-deoxy-L-arabinose-phosphoundecaprenol flippase, PbgE3                                                                                                                                                       | COG2076      | V  | 3107673 | 3108053 | 196  | 2.33 | 2.79e-10 |
| plu2655#    | CDS | pbgE2 | 4-amino-4-deoxy-L-arabinose-phosphoundecaprenol flippase, PbgE2                                                                                                                                                       | COG2076      | V  | 3108050 | 3108391 | 259  | 2.03 | 3.99e-9  |
| plu2656#    | CDS | pbgE1 | 4-amino-4-deoxy-L-arabinose transferase, PbgE1 protein                                                                                                                                                                | COG1807      | M  | 3108388 | 3110049 | 1447 | 2.29 | 1.06e-18 |
| plu2657##   | CDS | pbgP4 | Conserved hypothetical protein PbgP4                                                                                                                                                                                  | COG0726      | GM | 3110057 | 3110950 | 2419 | 2.40 | 5.20e-22 |
| plu2658##   | CDS | pbgP3 | UDP-L-Ara4N formyltransferase ; UDP-GlcA C-4'-decarboxylase PbgP3                                                                                                                                                     | COG0223      | J  | 3110950 | 3112932 | 6214 | 2.44 | 1.95e-24 |
| plu2659##   | CDS | pbgP2 | undecaprenyl phosphate-L-Ara4FN transferase PbgP2                                                                                                                                                                     | COG0463      | M  | 3112933 | 3113910 | 1623 | 2.49 | 1.84e-22 |
| plu2660##   | CDS | pbgP1 | UDP-4-amino-4-deoxy-L-arabinose--oxoglutarate aminotransferase PbgP1                                                                                                                                                  | COG0399      | M  | 3113911 | 3115056 | 2190 | 2.52 | 8.88e-24 |
| plu2689     | CDS | ftnA  | nonheme ferritin 1                                                                                                                                                                                                    | COG1528      | P  | 3191952 | 3192455 | 2640 | 1.01 | 5.37e-6  |
| plu2691     | CDS | pip   | proline iminopeptidase (PIP)                                                                                                                                                                                          | COG0596      | HR | 3193177 | 3194130 | 1359 | 1.89 | 1.29e-15 |
| plu2692     | CDS | yebF  | -                                                                                                                                                                                                                     | COG0596      | HR | 3194204 | 3194578 | 433  | 1.68 | 1.86e-8  |
| plu2704     | CDS | -     | -                                                                                                                                                                                                                     | COG0846      | O  | 3204991 | 3208869 | 309  | 1.16 | 1.53e-3  |
| plu2779     | CDS | yegP  | -                                                                                                                                                                                                                     | COG3422      | S  | 3297706 | 3298050 | 157  | 1.63 | 7.26e-5  |
| plu2784#    | CDS | pagP  | LipidA acyltransferase PagP                                                                                                                                                                                           | Unclassified |    | 3305063 | 3305686 | 201  | 1.80 | 2.10e-6  |
| plu2807#    | CDS | phoP  | Two-component response regulator PhoP                                                                                                                                                                                 | COG0745      | TK | 3332475 | 3333143 | 302  | 1.49 | 5.42e-5  |
| plu2808     | CDS | phoQ  | Two-component sensor kinase PhoQ                                                                                                                                                                                      | COG0642      | T  | 3333163 | 3334626 | 354  | 1.37 | 5.97e-5  |
| plu2842     | CDS | -     | conserved hypothetical protein                                                                                                                                                                                        | COG0702      | R  | 3373241 | 3373873 | 304  | 1.37 | 2.11e-5  |
| plu3067     | CDS | -     | conserved hypothetical protein                                                                                                                                                                                        | COG0654      | HC | 3575125 | 3575667 | 1508 | 2.22 | 1.90e-17 |
| plu3102     | CDS | -     | putative methyltransferase                                                                                                                                                                                            | COG2226      | H  | 3621255 | 3622079 | 242  | 1.82 | 7.57e-8  |
| plu3103     | CDS | -     | putative cysteine desulfurase (Nifs protein homolog)                                                                                                                                                                  | COG1104      | E  | 3622091 | 3623257 | 190  | 1.81 | 2.08e-6  |
| plu3104     | CDS | -     | conserved hypothetical protein                                                                                                                                                                                        | COG1104      | E  | 3623257 | 3624141 | 265  | 2.46 | 8.03e-13 |
| plu3107     | CDS | astB  | succinylarginine dihydrolase                                                                                                                                                                                          | COG3724      | E  | 3627587 | 3628930 | 43   | 1.87 | 7.58e-4  |
| plu3108     | CDS | astD  | succinylglutamate semialdehyde dehydrogenase                                                                                                                                                                          | COG1012      | C  | 3628981 | 3630456 | 109  | 2.21 | 4.99e-7  |
| plu3109     | CDS | astA  | arginine N-succinyltransferase (AOST)                                                                                                                                                                                 | COG3138      | E  | 3630459 | 3631490 | 70   | 2.47 | 4.65e-7  |
| plu3110     | CDS | argM  | succinylornithine transaminase (succinylornithine aminotransferase) (carbon starvation protein C)                                                                                                                     | COG4992      | E  | 3631512 | 3632720 | 102  | 2.75 | 1.29e-10 |
| plu3120     | CDS | -     | Putative membrane protein                                                                                                                                                                                             | COG3209      | R  | 3639471 | 3643967 | 194  | 1.85 | 2.31e-6  |
| plu3121     | CDS | -     | hypothetical protein                                                                                                                                                                                                  | COG3209      | R  | 3643983 | 3644150 | 199  | 1.79 | 2.55e-6  |
| plu3146     | CDS | lsrB  | ABC transporter Binding Protein (BP) LsrB                                                                                                                                                                             | COG1879      | G  | 3709664 | 3710683 | 149  | 1.25 | 4.12e-3  |
| plu3154     | CDS | -     | Hemolysin-coregulated protein (Hcp protein)                                                                                                                                                                           | COG3157      | U  | 3714422 | 3714901 | 481  | 1.40 | 2.19e-7  |
| plu3164     | CDS | yfcG  | -                                                                                                                                                                                                                     | COG0625      | O  | 3724793 | 3725413 | 511  | 1.08 | 1.54e-3  |
| plu3201     | CDS | fadI  | Beta-ketoacyl-CoA thiolase, anaerobic beta-oxidation complex II; in FadR regulon (by similarity)                                                                                                                      | COG0183      | I  | 3766624 | 3767934 | 152  | 1.41 | 1.16e-3  |
| plu3287     | CDS | treC  | Trehalose-6-phosphate hydrolase (alpha,alpha-phosphotrehalase)<br>PTS system, trehalose-specific IIBC component (EIIBC-TRE) (trehalose-permease IIBC component) (phosphotransferase enzyme II, BC component) (EI-TRE) | COG0366      | G  | 3901245 | 3902906 | 1241 | 1.88 | 1.30e-12 |
| plu3288#    | CDS | treB  | Putative major fimbrial sub-unit protein                                                                                                                                                                              | COG1263      | G  | 3903006 | 3904427 | 643  | 2.21 | 2.59e-14 |
| plu3507     | CDS | -     | putative Fimbrial regulatory gene                                                                                                                                                                                     | COG3539      | N  | 4099071 | 4099475 | 280  | 6.26 | 9.09e-47 |
| plu3508     | CDS | -     | putative Fimbrial regulatory gene                                                                                                                                                                                     | COG3539      | N  | 4100136 | 4100411 | 68   | 4.61 | 2.92e-17 |
| plu3509     | CDS | -     | conserved hypothetical protein                                                                                                                                                                                        | COG0456      | J  | 4100619 | 4101074 | 166  | 1.81 | 3.70e-6  |
| plu3539     | CDS | prpE  | Propionate--CoA ligase (Propionyl-CoA synthetase)                                                                                                                                                                     | COG0365      | I  | 4168817 | 4170703 | 213  | 1.18 | 4.20e-4  |
| plu3540     | CDS | prpD  | 2-methylcitrate dehydratase                                                                                                                                                                                           | COG2079      | G  | 4170776 | 4172227 | 254  | 1.43 | 3.21e-6  |
| plu3541     | CDS | prpC  | 2-methylcitrate synthase (Methylcitrate synthase) (Citrate synthase 2)                                                                                                                                                | COG0372      | C  | 4172282 | 4173448 | 209  | 1.62 | 5.93e-7  |
| plu3542     | CDS | prpB  | Probable methylisocitrate lyase (2-methylisocitrate lyase)                                                                                                                                                            | COG2513      | G  | 4173509 | 4174399 | 200  | 1.93 | 2.57e-9  |
| plu3543     | CDS | prpR  | Propionate catabolism operon regulatory protein                                                                                                                                                                       | COG3829      | KT | 4174732 | 4176399 | 373  | 1.46 | 1.71e-5  |



|             |     |       |                                                                                                                                                                                         |         |     |                                                                                                                                   |         |         |      |      |          |
|-------------|-----|-------|-----------------------------------------------------------------------------------------------------------------------------------------------------------------------------------------|---------|-----|-----------------------------------------------------------------------------------------------------------------------------------|---------|---------|------|------|----------|
| plu3569     | CDS | -     | TpsB protein                                                                                                                                                                            | COG2831 | U   | Intracellular trafficking, secretion, and vesicular transport                                                                     | 4208442 | 4210121 | 145  | 2.89 | 2.68e-12 |
| plu3593     | CDS | -     | conserved hypothetical protein                                                                                                                                                          | COG3210 | U   | Intracellular trafficking, secretion, and vesicular transport                                                                     | 4235193 | 4236086 | 25   | 3.34 | 7.30e-7  |
| plu3594     | CDS | -     | Putative TpsA-related protein                                                                                                                                                           | COG3210 | U   | Intracellular trafficking, secretion, and vesicular transport                                                                     | 4236073 | 4242480 | 4387 | 3.58 | 7.76e-50 |
| plu3595     | CDS | -     | -                                                                                                                                                                                       | COG2831 | U   | Intracellular trafficking, secretion, and vesicular transport                                                                     | 4242432 | 4242791 | 384  | 3.48 | 8.52e-26 |
| plu3596     | CDS | gcvP  | glycine dehydrogenase [decarboxylating] (glycine decarboxylase) (glycine cleavage system P-protein)                                                                                     | COG0403 | E   | Amino acid transport and metabolism                                                                                               | 4243413 | 4246289 | 1528 | 1.76 | 7.96e-13 |
| plu3597     | CDS | gcvH  | glycine cleavage system H protein                                                                                                                                                       | COG0509 | E   | Amino acid transport and metabolism                                                                                               | 4246377 | 4246769 | 828  | 1.12 | 6.57e-5  |
| plu3598     | CDS | gcvT  | aminomethyltransferase (glycine cleavage system T protein)                                                                                                                              | COG0404 | E   | metabolism                                                                                                                        | 4246891 | 4247985 | 973  | 1.45 | 3.70e-8  |
| plu3625     | CDS | -     | hypothetical protein                                                                                                                                                                    | COG0404 | E   | Unclassified                                                                                                                      | 4277274 | 4277642 | 324  | 1.20 | 4.39e-4  |
| plu3626     | CDS | -     | -                                                                                                                                                                                       | COG0472 | M   | Cell wall/membrane/envelope biogenesis                                                                                            | 4277690 | 4278037 | 134  | 1.53 | 3.16e-4  |
| plu3627     | CDS | -     | putative transcription regulator.                                                                                                                                                       | COG3655 | K   | Transcription                                                                                                                     | 4278307 | 4278528 | 295  | 1.14 | 3.42e-4  |
| plu3628     | CDS | -     | conserved hypothetical protein                                                                                                                                                          | COG1086 | MO  | Cell wall/membrane/envelope biogenesis, Posttranslational modification, protein turnover, chaperones                              | 4278537 | 4279115 | 843  | 1.53 | 3.98e-8  |
| plu3630     | CDS | -     | Conserved hypothetical protein                                                                                                                                                          | COG3539 | N   | Cell motility                                                                                                                     | 4280090 | 4280476 | 144  | 5.03 | 1.21e-26 |
| pluCDS42807 | CDS | -     | hypothetical protein                                                                                                                                                                    | COG3539 | N   | Unclassified                                                                                                                      | 4280440 | 4280703 | 115  | 5.30 | 4.11e-25 |
| plu3631     | CDS | -     | putative fimbrial chaperone YcbR precursor of Escherichia coli                                                                                                                          | COG3121 | W   | Extracellular structures                                                                                                          | 4280806 | 4281522 | 98   | 4.73 | 9.09e-20 |
| plu3632     | CDS | -     | -                                                                                                                                                                                       | COG3539 | N   | Cell motility                                                                                                                     | 4281533 | 4281748 | 30   | 3.98 | 1.67e-9  |
| plu3633     | CDS | -     | -                                                                                                                                                                                       | COG3539 | N   | Cell motility                                                                                                                     | 4281700 | 4281996 | 28   | 4.22 | 1.17e-9  |
| plu3634     | CDS | -     | putative the N-terminal region of outer membrane usher protein precursor                                                                                                                | COG3188 | NW  | Cell motility, Extracellular structures                                                                                           | 4282079 | 4283065 | 26   | 3.57 | 2.59e-7  |
| plu3635     | CDS | -     | conserved hypothetical protein                                                                                                                                                          | COG3188 | NW  | Unclassified                                                                                                                      | 4283163 | 4283507 | 7.42 | 3.30 | 7.20e-4  |
| plu3718     | CDS | -     | CdiA protein (TpsA-related family); presence of the VENN motif and DUF638 domain                                                                                                        | COG3210 | U   | Intracellular trafficking, secretion, and vesicular transport                                                                     | 4374057 | 4383140 | 1683 | 3.27 | 4.86e-39 |
| plu3719     | CDS | -     | CdiB protein (TpsB family)                                                                                                                                                              | COG2831 | U   | Intracellular trafficking, secretion, and vesicular transport                                                                     | 4383189 | 4384853 | 198  | 3.13 | 4.07e-17 |
| plu3725     | CDS | abgB  | aminobenzoyl-glutamate utilization protein B                                                                                                                                            | COG1473 | R   | General function prediction only                                                                                                  | 4391036 | 4392484 | 34   | 1.98 | 1.00e-3  |
| plu3727     | CDS | abgR  | Putative transcriptional regulator of abgABT operon                                                                                                                                     | COG0583 | K   | Transcription                                                                                                                     | 4394074 | 4394973 | 94   | 2.23 | 4.75e-7  |
| plu3740     | CDS | -     | putative sodium:alanine symporter and other amino acid transport proteins                                                                                                               | COG1115 | E   | Amino acid transport and metabolism                                                                                               | 4410741 | 4412108 | 670  | 1.36 | 6.34e-7  |
| plu3767     | CDS | setN  | Type III secretion component protein SetN                                                                                                                                               | COG1157 | NU  | Cell motility, Intracellular trafficking, secretion, and vesicular transport                                                      | 4434397 | 4435719 | 79   | 2.57 | 5.22e-7  |
| plu3771     | CDS | setR  | Type III secretion component protein SetR                                                                                                                                               | COG4790 | U   | Intracellular trafficking, secretion, and vesicular transport                                                                     | 4438248 | 4438901 | 7.69 | 3.86 | 4.81e-4  |
| plu3908     | CDS | ggt   | gamma-glutamyltranspeptidase                                                                                                                                                            | COG0405 | E   | Amino acid transport and metabolism                                                                                               | 4579987 | 4581747 | 895  | 1.22 | 8.07e-6  |
| plu3991     | CDS | sstT  | Na <sup>+</sup> /serine (threonine) symporter                                                                                                                                           | COG3633 | E   | Amino acid transport and metabolism                                                                                               | 4678384 | 4679631 | 234  | 1.19 | 2.34e-3  |
| plu4084     | CDS | -     | putative transport protein and multidrug resistance protein like bicyclomycin resistance protein                                                                                        | COG2814 | G   | Carbohydrate transport and metabolism                                                                                             | 4770938 | 4772125 | 249  | 1.36 | 2.61e-4  |
| plu4168     | CDS | tccB1 | A component of insecticidal toxin complex (part 2), protein TccB1                                                                                                                       | COG1538 | M   | Cell wall/membrane/envelope biogenesis                                                                                            | 4869362 | 4874056 | 737  | 1.04 | 4.61e-4  |
| plu4169     | CDS | tccA1 | A component of insecticidal toxin complex (part 1), protein TccA1                                                                                                                       | COG3206 | M   | Cell wall/membrane/envelope biogenesis                                                                                            | 4874151 | 4877051 | 482  | 1.49 | 1.38e-6  |
| plu4172     | CDS | -     | putative pyocin S3 immunity protein and to Photorhabdus luminescens proteins                                                                                                            | COG3206 | M   | Unclassified                                                                                                                      | 4878614 | 4879081 | 305  | 1.00 | 4.20e-3  |
| plu4210#    | CDS | -     | Conserved hypothetical protein with SANT/Myb DNA-binding domain (IPR01005)                                                                                                              | COG0287 | E   | Amino acid transport and metabolism                                                                                               | 4923248 | 4925854 | 554  | 1.46 | 4.75e-7  |
| plu4211#    | CDS | -     | Putative Type VI secretion system effector, Hcp (IPR008514)                                                                                                                             | COG3157 | U   | Intracellular trafficking, secretion, and vesicular transport                                                                     | 4925955 | 4926446 | 1819 | 2.52 | 7.93e-26 |
| plu4212#    | CDS | -     | Hypothetical protein                                                                                                                                                                    | COG3157 | U   | Unclassified                                                                                                                      | 4926419 | 4926589 | 248  | 2.14 | 3.54e-10 |
| plu4213     | CDS | -     | Hypothetical protein                                                                                                                                                                    | COG3157 | U   | Unclassified                                                                                                                      | 4926590 | 4926778 | 50   | 2.46 | 2.41e-6  |
| plu4214#    | CDS | -     | Putative type VI secretion system IcmF, C-terminal (domains IPR010623 and IPR09612)                                                                                                     | COG3523 | U   | Intracellular trafficking, secretion, and vesicular transport                                                                     | 4927191 | 4930550 | 672  | 2.17 | 3.29e-14 |
| plu4215#    | CDS | -     | Conserved hypothetical protein. Putative membrane protein.                                                                                                                              | COG3000 | I   | Lipid transport and metabolism                                                                                                    | 4930543 | 4931718 | 275  | 1.86 | 1.31e-7  |
| plu4216#    | CDS | -     | Conserved hypothetical protein                                                                                                                                                          | COG4104 | U   | Intracellular trafficking, secretion, and vesicular transport                                                                     | 4931721 | 4931996 | 135  | 1.54 | 1.87e-4  |
| plu4217#    | CDS | -     | Conserved hypothetical protein. Putative membrane protein                                                                                                                               | COG4104 | U   | Unclassified                                                                                                                      | 4932024 | 4932692 | 260  | 1.50 | 7.79e-6  |
| plu4220#    | CDS | -     | Conserved hypothetical protein with SANT/Myb DNA-binding domain (IPR01005)                                                                                                              | COG0287 | E   | Amino acid transport and metabolism                                                                                               | 4934952 | 4937552 | 1320 | 1.14 | 9.94e-5  |
| plu4221#    | CDS | -     | Conserved hypothetical protein                                                                                                                                                          | COG0287 | E   | Unclassified                                                                                                                      | 4937552 | 4938592 | 427  | 1.36 | 1.15e-4  |
| plu4222#    | CDS | -     | Putative Type VI secretion system, RhsGE-associated Vgr protein (domain IPR06533)                                                                                                       | COG3501 | UXR | Intracellular trafficking, secretion, and vesicular transport, Mobilome: prophages, transposons, General function prediction only | 4938603 | 4940981 | 907  | 1.33 | 3.63e-5  |
| plu4223#    | CDS | -     | Putative type VI secretion ATPase, ClpV1 family                                                                                                                                         | COG0542 | O   | Posttranslational modification, protein turnover, chaperones                                                                      | 4940978 | 4943659 | 1722 | 1.11 | 4.55e-4  |
| plu4291#    | CDS | -     | conserved hypothetical protein                                                                                                                                                          | COG3577 | R   | General function prediction only                                                                                                  | 5018093 | 5019289 | 644  | 2.05 | 5.07e-12 |
| plu4402     | CDS | fadB  | Fatty oxidation complex alpha subunit [includes: enoyl-CoA hydratase; delta(3)-cis-delta(2)-trans-enoyl-CoA isomerase; 3-hydroxyacyl-CoA dehydrogenase; 3-hydroxybutyryl-CoA epimerase] | COG1024 | I   | Lipid transport and metabolism                                                                                                    | 5149379 | 5151565 | 386  | 1.54 | 6.21e-7  |
| plu4403     | CDS | fadA  | 3-ketoacyl-CoA thiolase (fatty oxidation complex beta subunit) (beta-ketothiolase) (acetyl-CoA acyltransferase)                                                                         | COG0183 | I   | Lipid transport and metabolism                                                                                                    | 5151577 | 5152743 | 256  | 1.37 | 1.24e-4  |
| plu4556     | CDS | yfl   | -                                                                                                                                                                                       | COG1253 | R   | General function prediction only                                                                                                  | 5319488 | 5320819 | 253  | 1.32 | 1.50e-4  |
| plu4601     | CDS | -     | -                                                                                                                                                                                       | COG3501 | UXR | Intracellular trafficking, secretion, and vesicular transport, Mobilome: prophages, transposons, General function prediction only | 5368573 | 5370549 | 1438 | 1.35 | 2.16e-6  |
| plu4602     | CDS | -     | Conserved hypothetical protein                                                                                                                                                          | COG1716 | T   | Signal transduction mechanisms                                                                                                    | 5370546 | 5371037 | 620  | 1.43 | 4.68e-6  |
| plu4603     | CDS | -     | conserved hypothetical protein                                                                                                                                                          | COG1716 | T   | Unclassified                                                                                                                      | 5371040 | 5371384 | 341  | 1.29 | 4.00e-4  |
| plu4604     | CDS | -     | conserved hypothetical protein                                                                                                                                                          | COG1716 | T   | Unclassified                                                                                                                      | 5371386 | 5371994 | 338  | 1.40 | 6.45e-5  |
| plu4605     | CDS | -     | Conserved hypothetical protein                                                                                                                                                          | COG1716 | T   | Unclassified                                                                                                                      | 5372018 | 5372740 | 428  | 1.44 | 5.86e-6  |
| plu4606     | CDS | -     | conserved hypothetical protein                                                                                                                                                          | COG4104 | U   | Intracellular trafficking, secretion, and vesicular transport                                                                     | 5372743 | 5373006 | 110  | 1.38 | 2.86e-3  |
| plu4607     | CDS | -     | conserved hypothetical protein                                                                                                                                                          | COG4104 | U   | Unclassified                                                                                                                      | 5373170 | 5373802 | 270  | 1.46 | 7.69e-5  |
| plu4608     | CDS | -     | Conserved hypothetical protein                                                                                                                                                          | COG4104 | U   | Unclassified                                                                                                                      | 5373851 | 5374585 | 395  | 1.52 | 8.62e-7  |
| plu4609     | CDS | -     | conserved hypothetical protein                                                                                                                                                          | COG4104 | U   | Intracellular trafficking, secretion, and vesicular transport                                                                     | 5374588 | 5374851 | 145  | 1.54 | 5.76e-4  |



|         |     |      |                                                                               |         |   |                                                              |         |         |     |      |          |
|---------|-----|------|-------------------------------------------------------------------------------|---------|---|--------------------------------------------------------------|---------|---------|-----|------|----------|
| plu4611 | CDS | -    | conserved hypothetical protein                                                |         |   | Unclassified                                                 | 5375668 | 5376402 | 71  | 1.63 | 1.10e-3  |
| plu4767 | CDS | glpF | glycerol uptake facilitator protein                                           | COG0580 | G | Carbohydrate transport and metabolism                        | 5548786 | 5549616 | 373 | 1.07 | 1.84e-3  |
| plu4774 | CDS | pfkA | 6-phosphofructokinase isozyme I (phosphofructokinase-1) (phosphohexokinase-1) | COG0205 | G | Carbohydrate transport and metabolism                        | 5555554 | 5556525 | 828 | 1.24 | 3.19e-5  |
| plu4777 | CDS | ynbA | -                                                                             | COG0558 | I | Lipid transport and metabolism                               | 5558482 | 5559156 | 170 | 1.32 | 1.59e-3  |
| plu4793 | CDS | cpxP | periplasmic protein precursor                                                 | COG3678 | O | Posttranslational modification, protein turnover, chaperones | 5566624 | 5567118 | 246 | 2.25 | 1.60e-11 |

**Supplementary Table 3D:** RT-qPCR comparative analysis of 20 differentially expressed marker genes in polyB resistant clones (PolyR) cultivated in LB+polyB or in LB cultures (OD=0.3)

# indicates the genes belonging to the PhoP regulon in LB broth.

## indicates the genes belonging to the core PhoP regulon.

Colors highlight some functional categories:

|        |                                |
|--------|--------------------------------|
| Red    | components of secretion system |
| Green  | insecticidal toxins            |
| Blue   | transporter                    |
| Yellow | extracellular enzymes          |

| Label     | Type | Name  | Product                                                                                 | COG_ID  | COG_classID | COGClassDescription                                                                                                            | log2 fold change<br>RNA-Seq<br>PolyR(LB+poly)<br>vs<br>TT01(LB) | log2 fold change<br>RT-qPCR<br>PolyR(LB+poly)<br>vs<br>TT01(LB) | log2 fold change<br>RT-qPCR<br>PolyR(LB)<br>vs<br>TT01(LB) |
|-----------|------|-------|-----------------------------------------------------------------------------------------|---------|-------------|--------------------------------------------------------------------------------------------------------------------------------|-----------------------------------------------------------------|-----------------------------------------------------------------|------------------------------------------------------------|
| plu0015   | CDS  | pts20 | Major phage tail sheath protein                                                         | COG3497 | X           | Mobilome: prophages, transposons                                                                                               | -5.87                                                           | -6.16                                                           | -3.46                                                      |
| plu0226   | CDS  | -     | TpsB protein                                                                            | COG2831 | U           | Intracellular trafficking, secretion, and vesicular transport                                                                  | 4.53                                                            | 4.29                                                            | 2.61                                                       |
| plu0300   | CDS  | dppA  | Periplasmic dipeptide transport protein precursor DppA                                  | COG0747 | E           | Amino acid transport and metabolism                                                                                            | 2.15                                                            | 2.36                                                            | 0.3                                                        |
| plu0373   | CDS  | -     | Putative Type VI secretion system effector, Hcp (IPR008514)                             | COG3157 | U           | Intracellular trafficking, secretion, and vesicular transport                                                                  | -2.01                                                           | -1.74                                                           | -1.7                                                       |
| plu0549   | CDS  | -     | CdiB protein (TpsB family)                                                              | COG2831 | U           | Intracellular trafficking, secretion, and vesicular transport                                                                  | -2.43                                                           | -1.74                                                           | -1.14                                                      |
| plu0691## | CDS  | cutF  | Copper homeostasis protein CutF precursor                                               | COG3015 | MV          | Cell wall/membrane/envelope biogenesis, Defense mechanisms                                                                     | 1.6                                                             | 1.97                                                            | 1.61                                                       |
| plu0969   | CDS  | tcdB2 | B component of insecticidal toxin complex, protein TcdB2                                | COG3209 | R           | General function prediction only                                                                                               | 2.7                                                             | 2.35                                                            | 0.76                                                       |
| plu1367   | CDS  | -     | CdiA protein (TpsA-related family); presence of the VENN motif and DUF638 domain        | COG3210 | U           | Intracellular trafficking, secretion, and vesicular transport                                                                  | 2.92                                                            | 2.66                                                            | 0.7                                                        |
| plu1382   | CDS  | prtS  | Extracellular M4 metalloprotease precursor PrtS                                         | COG3227 | O           | Posttranslational modification, protein turnover, chaperones                                                                   | -2.16                                                           | -2.91                                                           | -3.25                                                      |
| plu1414   | CDS  | -     | putative hydrolase                                                                      | COG0561 | HR          | Coenzyme transport and metabolism, General function prediction only                                                            | -1.15                                                           | -0.61                                                           | -0.38                                                      |
| plu1516   | CDS  | -     | Lipase                                                                                  | COG3675 | I           | Lipid transport and metabolism                                                                                                 | -1.41                                                           | -0.92                                                           | -0.74                                                      |
| plu1579## | CDS  | -     | putative bacitracin transport permease YbjG of Escherichia coli                         | COG0671 | I           | Lipid transport and metabolism                                                                                                 | 1.82                                                            | 1.53                                                            | 0.61                                                       |
| plu2326   | CDS  | txp40 | Txp40, 40 kDa insecticidal protein (previously name A24tox)                             |         |             | Unclassified                                                                                                                   | 3.33                                                            | 3.09                                                            | 4.18                                                       |
| plu2480## | CDS  | ail1  | Ail protein precursor of Yersinia                                                       | COG3637 | M           | Cell wall/membrane/envelope biogenesis                                                                                         | 2.29                                                            | 1.73                                                            | 1.97                                                       |
| plu2660## | CDS  | pbpP1 | UDP-4-amino-4-deoxy-L-arabinose--oxoglutarate aminotransferase PbpP1                    | COG0399 | M           | Cell wall/membrane/envelope biogenesis                                                                                         | 2.52                                                            | 2.10                                                            | 1.57                                                       |
| plu2807#  | CDS  | phoP  | Two-component response regulator PhoP                                                   | COG0745 | TK          | Signal transduction mechanisms, Transcription                                                                                  | 1.49                                                            | 1.40                                                            | 0.64                                                       |
| plu3594   | CDS  | -     | Putative TpsA-related protein                                                           | COG3210 | U           | Intracellular trafficking, secretion, and vesicular transport                                                                  | 3.58                                                            | 3.36                                                            | 2.00                                                       |
| plu3718   | CDS  | -     | CdiA protein (TpsA-related family); presence of the VENN motif and DUF638 domain        | COG3210 | U           | Intracellular trafficking, secretion, and vesicular transport                                                                  | 3.27                                                            | 2.86                                                            | 1.16                                                       |
| plu4194   | CDS  | antA  | Ketoreductase AntA involved in anthraquinone biosynthesis (type II polyketide synthase) | COG1028 | IQR         | Lipid transport and metabolism, Secondary metabolites biosynthesis, transport and catabolism, General function prediction only | -3.8                                                            | -3.64                                                           | -4.8                                                       |
| plu4211## | CDS  | -     | Putative Type VI secretion system effector, Hcp (IPR008514)                             | COG3157 | U           | Intracellular trafficking, secretion, and vesicular transport                                                                  | 2.52                                                            | 2.46                                                            | 0.90                                                       |

Supplementary Table 4: Bacterial strains and plasmids used in this study.

| Strain or plasmid                             | Description                                                                                                                                                                               | Source or reference   |
|-----------------------------------------------|-------------------------------------------------------------------------------------------------------------------------------------------------------------------------------------------|-----------------------|
| <b><i>P. luminescens</i> strains</b>          |                                                                                                                                                                                           |                       |
| TT01                                          | Strain isolated from the nematode <i>Heterorhabditis bacteriophora</i> TH01 in Trinidad; wild-type (WT) form                                                                              | Laboratory collection |
| <i>phoP</i>                                   | TT01 <i>phoP</i> ::cat ; <i>phoP</i> mutant                                                                                                                                               | 1                     |
| <i>pbgE</i>                                   | TT01 <i>pbgE1</i> ::Kan ; <i>pbgE</i> mutant                                                                                                                                              | 2                     |
| <i>phoP</i> / pBBR1-MCS5                      | <i>phoP</i> mutant carrying pBBR1-MCS5 (negative control), Gm <sup>R</sup>                                                                                                                | This study            |
| <i>phoP</i> / P <sub>lac</sub> - <i>phoPQ</i> | <i>phoP</i> mutant carrying P <sub>lac</sub> - <i>phoPQ</i> plasmid, Gm <sup>R</sup>                                                                                                      | 1                     |
| <i>pbgE</i> / pBBR1-MCS5                      | <i>pbgE</i> mutant carrying pBBR1-MCS5 (negative control), Gm <sup>R</sup>                                                                                                                | This study            |
| <i>pbgE</i> / P <sub>lac</sub> - <i>pbgPE</i> | <i>pbgE</i> mutant carrying P <sub>lac</sub> - <i>pbgPE</i> plasmid, Gm <sup>R</sup>                                                                                                      | 3                     |
| TT01/ P <sub>pbgPE</sub> - <i>gfp</i> [AAV]   | TT01 carrying P <sub>pbgPE</sub> - <i>gfp</i> [AAV] plasmid, Kan <sup>R</sup>                                                                                                             | This study            |
| TT01/ P <sub>pbgPE</sub> - <i>gfp</i> [mut3]  | TT01 carrying P <sub>pbgPE</sub> - <i>gfp</i> [mut3] plasmid, Kan <sup>R</sup>                                                                                                            | This study            |
| TT01/ pPROBE- <i>gfp</i> [AAV]                | TT01 carrying pPROBE- <i>gfp</i> [AAV] plasmid, Kan <sup>R</sup>                                                                                                                          | This study            |
| <b><i>E. coli</i> strains</b>                 |                                                                                                                                                                                           |                       |
| XL1 blue MRF'                                 | Δ( <i>mcrA</i> )183 Δ( <i>mcrCB</i> - <i>hdsSMR</i> - <i>mrr</i> )173 <i>endA1 supE44 thi-1 recA1 gyrA96 relA1 lac</i> [F' proAB lacI <sup>q</sup> ZΔM15 Tn10 ( <i>Tet<sup>r</sup></i> )] | Stratagene            |
| WM3064                                        | <i>thrB1004 pro thi rpsL hsdS lacZ</i> ΔM15 RP4-1360 Δ( <i>araBAD</i> )567 Δ <i>dapA</i> 1341::[erm pir (wt)]                                                                             | 4                     |
| BL21 (DE3) pLysS                              | F <sup>-</sup> <i>dcm ompT hsdS</i> (r <sub>B</sub> <sup>-</sup> m <sub>B</sub> <sup>-</sup> ) <i>gal</i> λ(DE3) [pLysS Cam <sup>R</sup> ]                                                | Laboratory stock      |
| <b>Plasmids</b>                               |                                                                                                                                                                                           |                       |
| pBBR1-MCS5                                    | broad host range vector Gm <sup>R</sup> <i>mob</i>                                                                                                                                        | 5                     |
| pPROBE- <i>gfp</i> [AAV]                      | Plasmid (pBBR1 replicon) containing promoter-less <i>gfp</i> [AAV] gene downstream from a multiple cloning site, Kan <sup>R</sup>                                                         | 6                     |
| P <sub>pbgPE</sub> - <i>gfp</i> [AAV]         | pPROBE with <i>gfp</i> [AAV] under the control of <i>pbgPE</i> promoter, Kan <sup>R</sup>                                                                                                 | this study            |
| pBB-KGFP                                      | pBB broad host range <i>gfp</i> [mut3] Kan <sup>R</sup>                                                                                                                                   | S. Köhler             |

---

|                                    |                                                                                               |            |
|------------------------------------|-----------------------------------------------------------------------------------------------|------------|
| <b>P<sub>pbgPE</sub>-gfp[mut3]</b> | pPROBE with <i>gfp</i> [mut3] under the control of <i>pbgPE</i> promoter, Kan <sup>R</sup>    | this study |
| <b>P<sub>T7</sub>PhoP-His</b>      | pET28 with <i>phoP</i> (His-tag) in N-term under the control of T7 promoter; Amp <sup>R</sup> | 7          |

---

- 1 Derzelle, S. *et al.* The PhoP-PhoQ two-component regulatory system of *Photorhabdus luminescens* is essential for virulence in insects. *Journal of bacteriology* **186**, 1270-1279, doi: 10.1128/JB.186.5.1270-1279 (2004).
- 2 Bennett, H. P. & Clarke, D. J. The *pbgPE* operon in *Photorhabdus luminescens* is required for pathogenicity and symbiosis. *Journal of bacteriology* **187**, 77-84, doi:10.1128/JB.187.1.77-84.2005 (2005).
- 3 Abi Khattar, Z. *Impact de la résistance aux peptides antimicrobiens et aux composés toxiques sur les interactions bactéries-insectes : Cas des infections par Photorhabdus luminescens et Bacillus cereus* PhD thesis, Université Montpellier 2, Université Saint-Joseph de Beyrouth, (2009).
- 4 Paulick, A. *et al.* Two different stator systems drive a single polar flagellum in *Shewanella oneidensis* MR-1. *Molecular microbiology* **71**, 836-850, doi:10.1111/j.1365-2958.2008.06570.x (2009).
- 5 Kovach, M.E., Elzer, P.H., Hill, D.S., Robertson, G.T., Farris, M.A., Roop, R.M., 2nd, and Peterson, K.M. Four new derivatives of the broad-host-range cloning vector pBBR1MCS, carrying different antibiotic-resistance cassettes. *Gene* **166**: 175–176, doi:10.1016/0378-1119(95)00584-1 (1995).
- 6 Miller, W. G., Leveau, J. H. & Lindow, S. E. Improved *gfp* and *inaZ* broad-host-range promoter-probe vectors. *Molecular plant-microbe interactions : MPMI* **13**, 1243-1250, doi:10.1094/MPMI.2000.13.11.1243 (2000).
- 7 Mouammine, A. *et al.* Ail and PagC-related proteins in the entomopathogenic bacteria of *Photorhabdus* genus. *PLoS one* **9**, e110060, doi:10.1371/journal.pone.0110060 (2014).

Supplementary Table 5

| Primer name                         | Primer sequence (5' to 3')                    | Use                                                                                           |
|-------------------------------------|-----------------------------------------------|-----------------------------------------------------------------------------------------------|
| L-P <sub>pbgPE</sub> - <i>Xba</i> I | GCTCTAGATTACAGTCCAGGCTTATGTATGTGCC            | cloning of <i>pbgPE</i> promoter from <i>Photorhabdus luminescens</i> TT01                    |
| R-P <sub>pbgPE</sub> - <i>Kpn</i> I | CAGGTACCCTATGGAAGAAAGCTATCCATAAAA<br>CACAGTCC |                                                                                               |
| L-P <sub>pbgPE</sub>                | TTACAGTCCAGGCTTATGTATGTGCC                    | EMSA analysis of <i>pbgPE</i> promoter                                                        |
| R-P <sub>pbgPE</sub>                | ATGGAAGAAAGCTATCCATAAAAACACAGTCC              |                                                                                               |
| L-P <sub>phoP</sub>                 | AAACATCCGTCTGTTGCTATCC                        | EMSA analysis of <i>phoP</i> promoter                                                         |
| R-P <sub>phoP</sub>                 | CTCTCCAGCAGGCAGTTATTG                         |                                                                                               |
| L- <i>gyrB</i>                      | ATACACGAAGAAGAAGGTGTTTCAG                     | qRT-PCR of an internal region within <i>gyrB</i> from <i>Photorhabdus luminescens</i> TT01    |
| R- <i>gyrB</i>                      | TACCTGTCTGTTTCAGTTTCTCCAAC                    |                                                                                               |
| L- <i>recA</i>                      | GTTCAATGGACGTTGAAACTATCTC                     | qRT-PCR of an internal region within <i>recA</i> from <i>Photorhabdus luminescens</i> TT01    |
| R- <i>recA</i>                      | ATCAACACCCAACCTTCTTAGCATAG                    |                                                                                               |
| L- <i>cutF</i>                      | GTAGATCAGACTTTTCATGGTGCTC                     | qRT-PCR of an internal region within <i>cutF</i> from <i>Photorhabdus luminescens</i> TT01    |
| R- <i>cutF</i>                      | AGATTTCTGGTCGCTGATTTTGTC                      |                                                                                               |
| L- <i>ail1</i> P1                   | AGAACATTAGTGGCTTCAGTGGTAG                     | qRT-PCR of an internal region within <i>ail1</i> from <i>Photorhabdus luminescens</i> TT01    |
| R- <i>ail1</i> P1                   | ATTATCCAACCTCGTAGCGGTATTTTC                   |                                                                                               |
| L- <i>pbgP1</i>                     | GAATTCGATGTCTAAAGTTTCATGG                     | qRT-PCR of an internal region within <i>pbgP1</i> from <i>Photorhabdus luminescens</i> TT01   |
| R- <i>pbgP1</i>                     | GCGAATATTCATTGATTCCAATTTA                     |                                                                                               |
| L- <i>mgtE</i>                      | ACTGTAGCCGATGATTTATTTGTGT                     | qRT-PCR of an internal region within <i>mgtE</i> from <i>Photorhabdus luminescens</i> TT01    |
| R- <i>mgtE</i>                      | ACGTATTTTCATCTTCAACCAACTC                     |                                                                                               |
| L-3988                              | GCAACGAAAGATTGTTATGGATTAT                     | qRT-PCR of an internal region within <i>plu3988</i> from <i>Photorhabdus luminescens</i> TT01 |
| R-3988                              | TAATGATTCCCAGAAAGAGTCGTAA                     |                                                                                               |
| L- <i>plu4211</i>                   | AAAGGTTTCGGTGGATGTACACAAC                     | qRT-PCR of an internal region within <i>plu4211</i> from <i>Photorhabdus luminescens</i> TT01 |
| R- <i>plu4211</i>                   | CGCTTTATACAGATACGGGCTAGA                      |                                                                                               |
| L- <i>plu4227</i>                   | GGTTTACTCGTCTTTGTTTGAGAAA                     | qRT-PCR of an internal region within <i>plu4227</i> from <i>Photorhabdus luminescens</i> TT01 |
| R- <i>plu4227</i>                   | CTTTATCCAACCTGTTCCACTTTTGTG                   |                                                                                               |

| <b>Primer name</b> | <b>Primer sequence (5' to 3')</b> | <b>Use</b>                                                                                    |
|--------------------|-----------------------------------|-----------------------------------------------------------------------------------------------|
| L-plu0015          | AATTAGGTGTGAAGCCTCGTATTCT         | qRT-PCR of an internal region within <i>plu0015</i> from <i>Photorhabdus luminescens</i> TT01 |
| R-plu0015          | ATCAGTTCTCGTTGACTGAAGTTTT         |                                                                                               |
| L-plu0226          | GTTATATCGTGATGGAGAGCAGAAG         | qRT-PCR of an internal region within <i>plu0226</i> from <i>Photorhabdus luminescens</i> TT01 |
| R-plu0226          | ACCATCGGGTTAAAGGTGACATAG          |                                                                                               |
| L-plu0300          | GCAGAATATGCAGATAAGATGATGA         | qRT-PCR of an internal region within <i>plu0300</i> from <i>Photorhabdus luminescens</i> TT01 |
| R-plu0300          | AATAGAGAAAAGTAGCCGGTCAACT         |                                                                                               |
| L-plu0373          | GCAACCATCTTTAGTCAGGACATTA         | qRT-PCR of an internal region within <i>plu0373</i> from <i>Photorhabdus luminescens</i> TT01 |
| R-plu0373          | AAATACCTCCCAGAATCTCATTCT          |                                                                                               |
| L-plu0549          | AAGCAAAAATCTGAATGTCCAAGT          | qRT-PCR of an internal region within <i>plu0549</i> from <i>Photorhabdus luminescens</i> TT01 |
| R-plu0549          | TACCGATGTAGTGACGATGAGATAA         |                                                                                               |
| L-plu0969          | TGGTTGTTCTACCTGGTATTTGATT         | qRT-PCR of an internal region within <i>plu0969</i> from <i>Photorhabdus luminescens</i> TT01 |
| R-plu0969          | GATACATCAGTATCTGACGGCATAA         |                                                                                               |
| L-plu1367          | TACTCAAGTTGCTAATCCAAGT            | qRT-PCR of an internal region within <i>plu1367</i> from <i>Photorhabdus luminescens</i> TT01 |
| R-plu1367          | ACCTGCTCCTACAGGAGAATAGTTT         |                                                                                               |
| L-plu1382          | TGAAGAAGCTGATTGGATTATAGGT         | qRT-PCR of an internal region within <i>plu1382</i> from <i>Photorhabdus luminescens</i> TT01 |
| R-plu1382          | ACTCCACCATTGTCTCTATAAATCG         |                                                                                               |
| L-plu1414          | TCAAGTATGGGAAAGCAAATTGTAT         | qRT-PCR of an internal region within <i>plu1414</i> from <i>Photorhabdus luminescens</i> TT01 |
| R-plu1414          | TCAATCACTCTTTTACGATGTGAC          |                                                                                               |
| L-plu1516          | GGTTTGATGAGAATTTCAATGTAGG         | qRT-PCR of an internal region within <i>plu1516</i> from <i>Photorhabdus luminescens</i> TT01 |
| R-plu1516          | ATTTTATCAATTGCCTCAATCAATG         |                                                                                               |
| L-plu1579          | GAAGGCTTCGGTTATAACTTTCTTC         | qRT-PCR of an internal region within <i>plu1579</i> from <i>Photorhabdus luminescens</i> TT01 |
| R-plu1579          | AGTGAACGCCTAAATAGACTCTGG          |                                                                                               |
| L-plu2326          | GATTACCTGATGGCAGAATAGGTTA         | qRT-PCR of an internal region within <i>plu2326</i> from <i>Photorhabdus luminescens</i> TT01 |
| R-plu2326          | GTACCAATACTTTTGTGCTGTCT           |                                                                                               |

| <b>Primer name</b> | <b>Primer sequence (5' to 3')</b> | <b>Use</b>                                                                                    |
|--------------------|-----------------------------------|-----------------------------------------------------------------------------------------------|
| L-plu2807          | ATTACTATCTGGTCGAGAGCGAAC          | qRT-PCR of an internal region within <i>plu2807</i> from <i>Photorhabdus luminescens</i> TT01 |
| R-plu2807          | TGGTAACATAATCATCTGCTCCTG          |                                                                                               |
| L-plu3594          | CCCCTATGAATATGAAGATGAACAC         | qRT-PCR of an internal region within <i>plu3594</i> from <i>Photorhabdus luminescens</i> TT01 |
| R-plu3594          | TCAGTATCAATAATGTCACCACCAG         |                                                                                               |
| L-plu3718          | CTGACGGGGACTCATAACTCAG            | qRT-PCR of an internal region within <i>plu3718</i> from <i>Photorhabdus luminescens</i> TT01 |
| R-plu3718          | TTTATTACCTGCGTTGATCAATTTT         |                                                                                               |
| L-plu4194          | CTTATTCTGCTTCTAAGCATGGTGT         | qRT-PCR of an internal region within <i>plu4194</i> from <i>Photorhabdus luminescens</i> TT01 |
| R-plu4194          | TCTTCTACTCTTCTTTTCGCTTCTG         |                                                                                               |
